# Supplementary material for: Variable lignin structure revealed inPopulusleaves
Source: Royal Society of Chemistry journal article supplement (doi:10.1039/d3ra03142j), 2023-01-01

## Supplementary Information

### Variable lignin structure revealed in *Populus* leaves

Nathan Bryant<sup>a</sup>, Nancy Engle<sup>b</sup>, Timothy Tschaplinski<sup>b</sup>, Yunqiao Pu<sup>b</sup>, Arthur J. Ragauskas<sup>a,b,c,\*</sup>

<sup>a</sup> Department of Chemical and Biomolecular Engineering, University of Tennessee, Knoxville, Tennessee 37996, United States

<sup>b</sup> BioEnergy Science Center & Center for Bioenergy Innovation, Biosciences Division, University of Tennessee-Oak Ridge National Laboratory Joint Institute for Biological Science, Oak Ridge National Laboratory, Oak Ridge, TN 37831, USA

<sup>c</sup> Department of Chemical and Biomolecular Engineering, University of Tennessee, Center for Renewable Carbon, Department of Forestry, Wildlife, and Fisheries, University of Tennessee Institute of Agriculture, Knoxville, TN 37996 (USA)

Corresponding author email address: [aragausk@utk.edu](mailto:aragausk@utk.edu)

Enzymatic hydrolysis yields of select samples

| <b>Sample</b>    | <b>Leaf biomass pre-EH (mg)</b> | <b>Leaf biomass post-EH (mg)</b> | <b>Mass loss during EH (mg)</b> | <b>Mass loss during EH (%)</b> |
|------------------|---------------------------------|----------------------------------|---------------------------------|--------------------------------|
| 1121-N-1-17-9    | 412.4                           | 211                              | 201.4                           | 49%                            |
| 1121-N-2-23-77   | 351.1                           | 186.1                            | 165                             | 47%                            |
| GW-9591-N-1-17-8 | 447.9                           | 171.4                            | 276.5                           | 62%                            |

FTIR absorbance values of spectra after baseline correction and normalization between [0,1].

| <b>Sample</b>     | <b>1620-1625 cm<sup>-1</sup></b> | <b>1515-1520 cm<sup>-1</sup></b> | <b>1315-1320 cm<sup>-1</sup></b> | <b>1230-1235 cm<sup>-1</sup></b> | <b>890-895 cm<sup>-1</sup></b> | <b>822-827 cm<sup>-1</sup></b> |
|-------------------|----------------------------------|----------------------------------|----------------------------------|----------------------------------|--------------------------------|--------------------------------|
| 425-S-4-26-30     | 0.552                            | 0.263                            | 0.117                            | 0.111                            | 0.112                          | 0.115                          |
| 1121-N-1-17-9     | 0.632                            | 0.260                            | 0.078                            | 0.050                            | 0.034                          | 0.049                          |
| 1121-N-2-23-77    | 0.544                            | 0.196                            | 0.062                            | 0.043                            | 0.045                          | 0.037                          |
| 1121-S-3-8-39     | 0.606                            | 0.256                            | 0.071                            | 0.067                            | 0.028                          | 0.063                          |
| GW-9591-N-1-17-8  | 0.605                            | 0.254                            | 0.069                            | 0.066                            | 0.046                          | 0.059                          |
| 425-N-1-25-5      | 0.808                            | 0.199                            | 0.464                            | 0.030                            | 0.088                          | 0.077                          |
| 856-S-4-26-29     | 1                                | 0.452                            | 0.442                            | 0.106                            | 0.079                          | 0.120                          |
| 1025-N-2-7-47     | 1                                | 0.559                            | 0.387                            | 0.084                            | 0.047                          | 0.114                          |
| 1031-N-1-3-32     | 1                                | 0.612                            | 0.278                            | 0.104                            | 0.051                          | 0.146                          |
| 1121-S-4-24-25    | 1                                | 0.563                            | 0.290                            | 0.065                            | 0.042                          | 0.123                          |
| 1181-S-4-27-3     | 1                                | 0.513                            | 0.341                            | 0.057                            | 0.031                          | 0.080                          |
| GW-9589-S-3-5-9   | 1                                | 0.450                            | 0.421                            | 0.069                            | 0.063                          | 0.091                          |
| GW-9591-S-4-22-27 | 1                                | 0.582                            | 0.346                            | 0.167                            | 0.071                          | 0.116                          |
| GW-9860-N-1-22-44 | 1                                | 0.326                            | 0.588                            | 0.068                            | 0.071                          | 0.098                          |
| GW-9953-N         | 1                                | 0.335                            | 0.560                            | 0.034                            | 0.048                          | 0.061                          |
| LILC-26-4-S-23-13 | 1                                | 0.341                            | 0.636                            | 0.089                            | 0.097                          | 0.105                          |

Ratios of FTIR peaks of interest and NMR S/G ratio for comparison

| Sample            | 830 cm <sup>-1</sup> /<br>1230-1235cm <sup>-1</sup> | 1620-1625cm <sup>-1</sup> /<br>1515-1520cm <sup>-1</sup> | 1315-1320cm <sup>-1</sup> /<br>1230-1235cm <sup>-1</sup> | 830cm <sup>-1</sup> /<br>890-895cm <sup>-1</sup> | NMR<br>S/G<br>ratio |
|-------------------|-----------------------------------------------------|----------------------------------------------------------|----------------------------------------------------------|--------------------------------------------------|---------------------|
| 425-S-4-26-30     | 0.50                                                | 2.10                                                     | 1.05                                                     | 1.02                                             |                     |
| 1121-N-1-17-9     | 0.23                                                | 2.43                                                     | 1.55                                                     | 1.44                                             | 2.9                 |
| 1121-N-2-23-77    | 0.20                                                | 2.77                                                     | 1.43                                                     | 0.82                                             | 1.5                 |
| 1121-S-3-8-39     | 0.33                                                | 2.37                                                     | 1.06                                                     | 2.24                                             |                     |
| GW-9591-N-1-17-8  | 0.26                                                | 2.38                                                     | 1.05                                                     | 1.27                                             |                     |
| 425-N-1-25-5      | 0.30                                                | 4.07                                                     | 15.59                                                    | 0.88                                             | 0.6                 |
| 856-S-4-26-29     | 0.47                                                | 2.21                                                     | 4.17                                                     | 1.53                                             | 0.7                 |
| 1025-N-2-7-47     | 0.55                                                | 1.79                                                     | 4.61                                                     | 2.43                                             | 3.4                 |
| 1031-N-1-3-32     | 0.55                                                | 1.63                                                     | 2.68                                                     | 2.88                                             | 9.8                 |
| 1121-S-4-24-25    | 0.57                                                | 1.78                                                     | 4.46                                                     | 2.93                                             | 8.1                 |
| 1181-S-4-27-3     | 0.46                                                | 1.95                                                     | 6.02                                                     | 2.57                                             | 2.8                 |
| GW-9589-S-3-5-9   | 0.42                                                | 2.22                                                     | 6.07                                                     | 1.46                                             | 1.2                 |
| GW-9591-S-4-22-27 | 0.40                                                | 1.72                                                     | 2.07                                                     | 1.64                                             | 0.5                 |
| GW-9860-N-1-22-44 | 0.38                                                | 3.06                                                     | 8.70                                                     | 1.39                                             | 0.7                 |
| GW-9953-N         | 0.38                                                | 2.99                                                     | 16.59                                                    | 1.26                                             | 0.6                 |
| LILC-26-4-S-23-13 | 0.37                                                | 2.93                                                     | 7.12                                                     | 1.09                                             | 0.3                 |

FTIR absorbance ratio of the 830cm<sup>-1</sup> (associated with syringyl units) and 1230cm<sup>-1</sup> (associated with guaiacyl units) peaks. Statistical tests reveal these two measurements are correlated (CC=0.58, p-value=0.03).

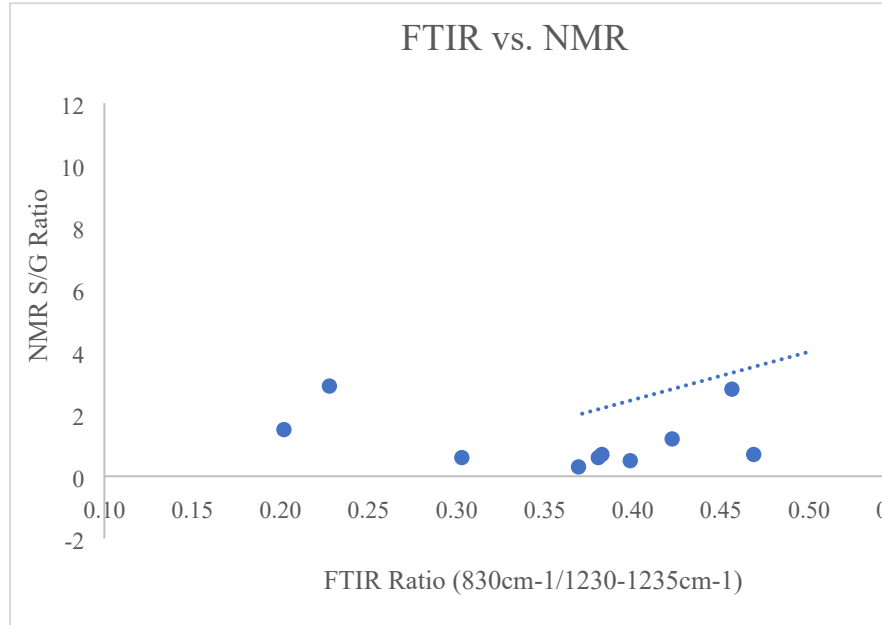

**Linear Fit**  
 Column 1 = 0.3488194 + 0.022383\*Column 2

**Summary of Fit**

|                            |          |
|----------------------------|----------|
| RSquare                    | 0.345962 |
| RSquare Adj                | 0.286504 |
| Root Mean Square Error     | 0.097724 |
| Mean of Response           | 0.40581  |
| Observations (or Sum Wgts) | 13       |

**Lack Of Fit**

**Analysis of Variance**

| Source   | DF | Sum of Squares | Mean Square | F Ratio            |
|----------|----|----------------|-------------|--------------------|
| Model    | 1  | 0.05556687     | 0.055567    | 5.8186             |
| Error    | 11 | 0.10504875     | 0.009550    | <b>Prob &gt; F</b> |
| C. Total | 12 | 0.16061562     |             | <b>0.0345*</b>     |

**Parameter Estimates**

| Term      | Estimate  | Std Error | t Ratio | Prob> t        |
|-----------|-----------|-----------|---------|----------------|
| Intercept | 0.3488194 | 0.035956  | 9.70    | <.0001*        |
| Column 2  | 0.022383  | 0.009279  | 2.41    | <b>0.0345*</b> |

**Multivariate**

**Correlations**

|          | Column 1 | Column 2 |
|----------|----------|----------|
| Column 1 | 1.0000   | 0.5824   |
| Column 2 | 0.5824   | 1.0000   |

## Correlations between S/G ratio and $\beta$ -O-4 linkage abundance

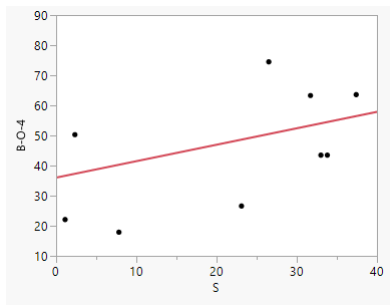

S units (uncondensed) vs.  $\beta$ -O-4 content for all data points.  $p$ -value=0.28. CC=0.36.

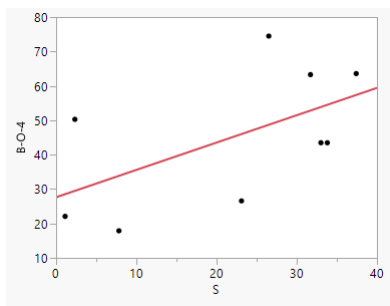

S units (uncondensed) vs.  $\beta$ -O-4 content, two S/G outlier samples removed.  $p$ -value=0.11. CC=0.57.

Principal component analysis of FTIR spectra from Figure 4 in the main text, re-scaled to illustrate 95% confidence intervals.

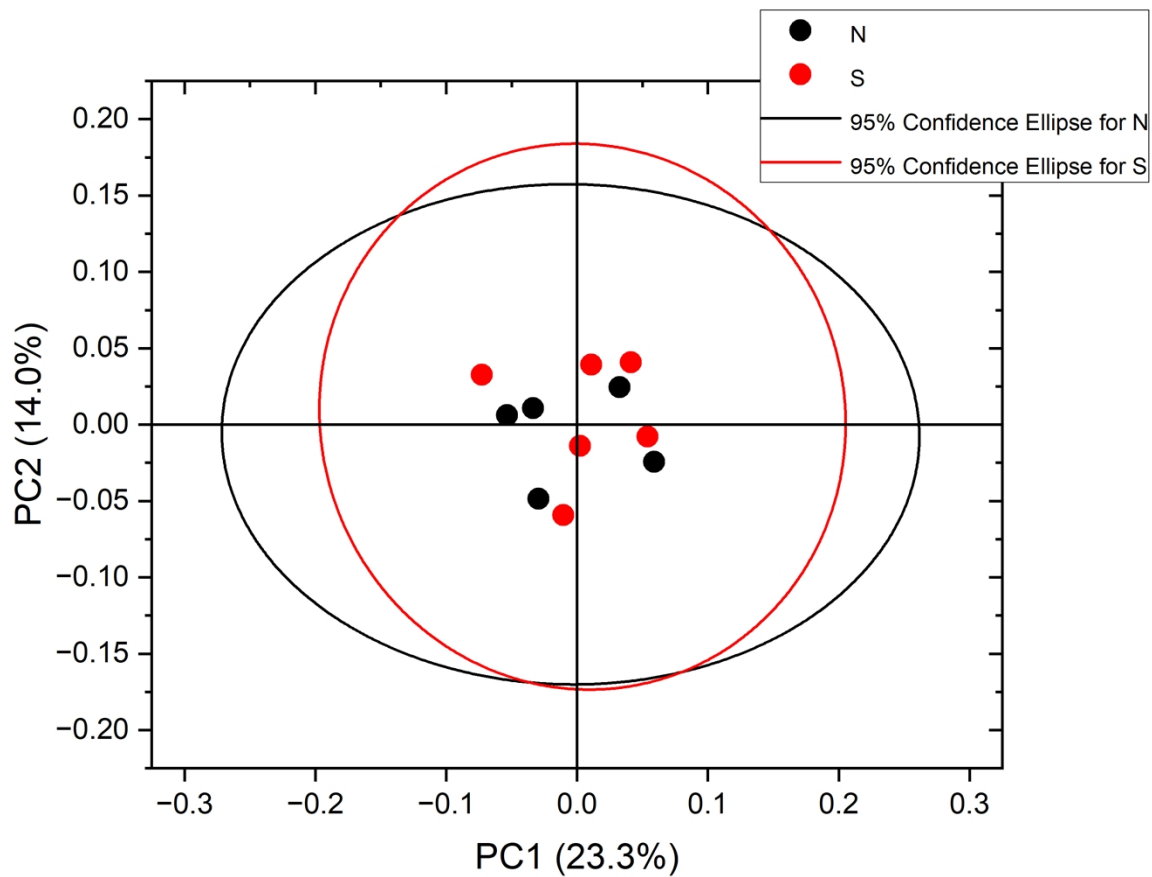

Principal component analysis of metabolite abundance from Figure 6 in the main text, re-scaled to illustrate 95% confidence intervals.

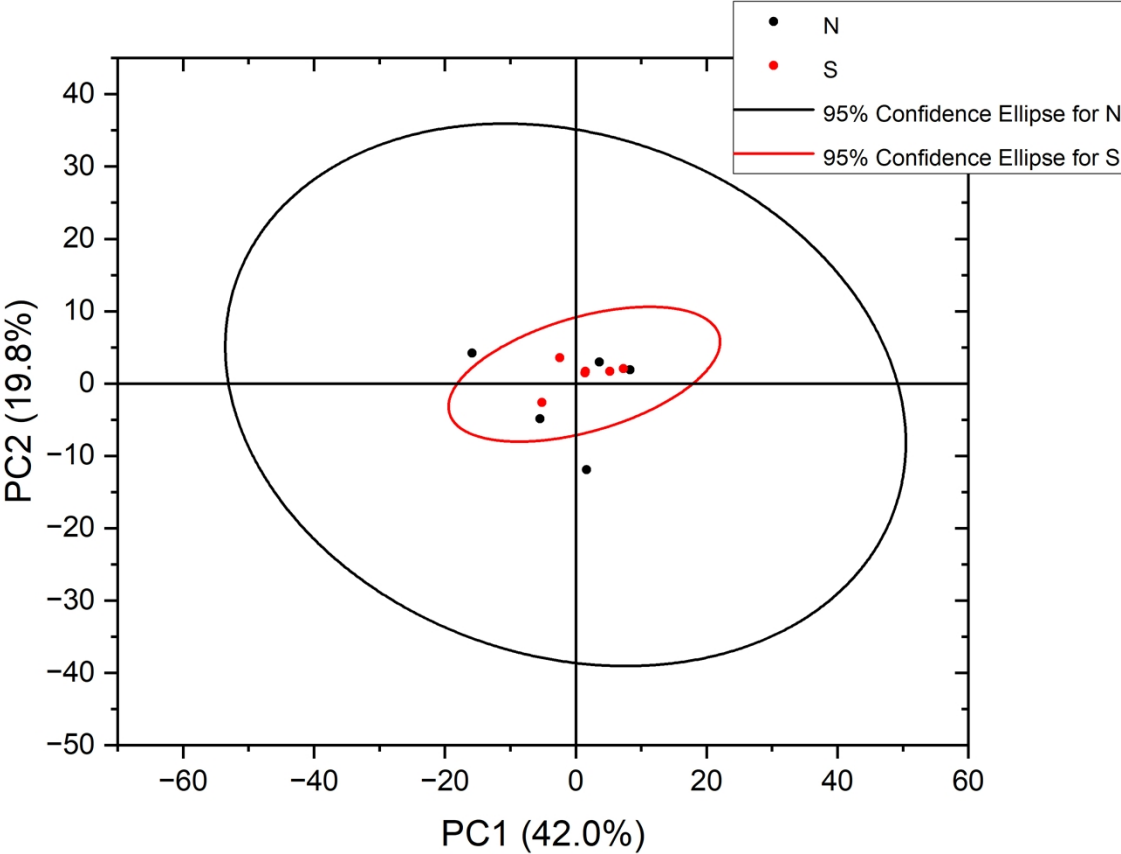

Supplement: d3ra03142j4.pdf [file d3ra03142j4.pdf]
