# Supplementary material for: Variable lignin structure revealed inPopulusleaves
Source: Royal Society of Chemistry journal article supplement (doi:10.1039/d3ra03142j), 2023-01-01
Supplement: d3ra03142j1.xlsx [file d3ra03142j1.xlsx]

## Sheet: Sheet1
Principal Component Number	Eigenvalue	Wavenumber	PC1 (23.3%)	PC2 (14.0%)	Spectral Names	PC1 (23.3%)	PC2 (14.0%)	Group	Level Names	Outlier	X of Ellipse	Y of Ellipse	Group for Ellipse
Eigenvalues	Eigenvalues	Loadings	Loadings	Loadings	Scores	Scores	Scores	Scores	Scores	Scores	Scores	Scores	Scores
1	0.00195	1800	0.01633	0.00268	425-N-1-25-5	-0.03343	0.01066	1	N		-0.27147	-0.00403	1
2	0.00118	1799.5	0.0122	0.00949	856-S-4-26-29	0.00231	-0.01398	2	S		-0.27146	-0.003	1
3	0.000943988	1799	-0.0038	-0.00724	1025-N-2-7-47	0.03266	0.02447	1			-0.27143	-0.00197	1
4	0.000858677	1798.5	-0.01536	-0.01204	1031-N-1-3-32	0.05907	-0.02432	1		1031-N-1-3-32	-0.2714	-0.0009438	1
5	0.000756766	1798	-0.01118	-0.00448	1121-S-4-24-25	0.0109	0.0392	2			-0.27135	8.56582e-05	1
6	0.000725209	1797.5	-0.01022	-0.000226645	1181-S-4-27-3	0.05375	-0.00783	2			-0.2713	0.00111	1
7	0.000642762	1797	-0.000321866	0.01057	GW-9589-S-3-5-9	-0.01053	-0.05935	2		GW-9589-S-3-5-9	-0.27123	0.00214	1
8	0.000511252	1796.5	0.012	0.01736	GW-9591-S-4-22-27	0.04105	0.04077	2		GW-9591-S-4-22-27	-0.27115	0.00317	1
9	0.000448721	1796	0.00599	0.01453	GW-9860-N-1-22-44	-0.05359	0.00627	1			-0.27106	0.0042	1
10	0.000357509	1795.5	-0.00623	0.00911	GW-9953-N	-0.02954	-0.04865	1			-0.27097	0.00523	1
11	9.35426e-34	1795	-0.01325	0.000550842	LILC-26-4-S-23-13	-0.07265	0.03276	2		LILC-26-4-S-23-13	-0.27086	0.00626	1
		1794.5	-0.00839	-0.0103							-0.27074	0.00728	1
		1794	0.01454	-0.02109							-0.27061	0.00831	1
		1793.5	0.03195	-0.00713							-0.27047	0.00933	1
		1793	0.01515	0.00763							-0.27032	0.01036	1
		1792.5	-0.01642	-0.00254							-0.27015	0.01138	1
		1792	-0.02356	-0.00191							-0.26998	0.01241	1
		1791.5	-0.00883	0.00207							-0.2698	0.01343	1
		1791	-0.00196	-0.01084							-0.26961	0.01445	1
		1790.5	-0.0011	-0.01977							-0.2694	0.01547	1
		1790	0.00303	-0.00632							-0.26919	0.01649	1
		1789.5	0.00422	0.0097							-0.26897	0.01751	1
		1789	0.00178	0.00846							-0.26873	0.01853	1
		1788.5	-0.00316	0.0045							-0.26849	0.01955	1
		1788	-0.00612	0.000807325							-0.26823	0.02057	1
		1787.5	-0.00806	-0.00567							-0.26796	0.02158	1
		1787	-0.00663	-0.01028							-0.26769	0.0226	1
		1786.5	-0.00229	-0.00678							-0.2674	0.02361	1
		1786	0.000738853	0.00514							-0.2671	0.02462	1
		1785.5	0.00664	0.01365							-0.2668	0.02563	1
		1785	0.00766	0.01571							-0.26648	0.02664	1
		1784.5	0.00113	-0.00155							-0.26615	0.02765	1
		1784	-0.00352	-0.02196							-0.26581	0.02866	1
		1783.5	-0.00735	-0.01182							-0.26546	0.02967	1
		1783	-0.01012	0.000557075							-0.2651	0.03067	1
		1782.5	-0.00859	9.26436e-05							-0.26473	0.03167	1
		1782	-0.000468446	0.00431							-0.26435	0.03267	1
		1781.5	0.01025	0.01987							-0.26396	0.03367	1
		1781	0.0133	0.02464							-0.26356	0.03467	1
		1780.5	0.0128	0.01502							-0.26315	0.03567	1
		1780	0.00498	0.00636							-0.26273	0.03666	1
		1779.5	-0.00524	-0.01206							-0.2623	0.03766	1
		1779	-0.00559	-0.01527							-0.26186	0.03865	1
		1778.5	-0.00272	-0.00499							-0.26141	0.03964	1
		1778	-0.00207	-0.00663							-0.26095	0.04062	1
		1777.5	-0.01	-0.00849							-0.26048	0.04161	1
		1777	-0.01576	-0.00231							-0.26	0.04259	1
		1776.5	-0.00482	0.01578							-0.2595	0.04358	1
		1776	0.0042	0.02784							-0.259	0.04456	1
		1775.5	0.000914835	0.01837							-0.25849	0.04554	1
		1775	-0.00126	0.00174							-0.25797	0.04651	1
		1774.5	0.00394	-0.01165							-0.25744	0.04749	1
		1774	0.01924	-0.01146							-0.2569	0.04846	1
		1773.5	0.02616	0.00575							-0.25634	0.04943	1
		1773	-0.0031	0.02015							-0.25578	0.05039	1
		1772.5	-0.02721	0.00664							-0.25521	0.05136	1
		1772	-0.01083	-0.02508							-0.25463	0.05232	1
		1771.5	0.00557	-0.0399							-0.25404	0.05328	1
		1771	0.00268	-0.03035							-0.25344	0.05424	1
		1770.5	-0.01048	-0.01248							-0.25282	0.0552	1
		1770	-0.0147	-0.000828192							-0.2522	0.05615	1
		1769.5	0.00245	0.01768							-0.25157	0.0571	1
		1769	0.02203	0.04814							-0.25093	0.05805	1
		1768.5	0.02384	0.04548							-0.25028	0.059	1
		1768	0.00625	0.000788828							-0.24962	0.05994	1
		1767.5	-0.01057	-0.02892							-0.24895	0.06088	1
		1767	-0.01577	-0.02442							-0.24827	0.06182	1
		1766.5	-0.01279	0.00225							-0.24758	0.06275	1
		1766	-0.00113	0.02618							-0.24689	0.06369	1
		1765.5	0.00325	0.01367							-0.24618	0.06462	1
		1765	-0.0047	-0.00788							-0.24546	0.06554	1
		1764.5	-0.00528	-0.01113							-0.24473	0.06647	1
		1764	-0.00462	-0.00924							-0.244	0.06739	1
		1763.5	-0.00829	0.00302							-0.24325	0.06831	1
		1763	0.00525	0.01866							-0.2425	0.06922	1
		1762.5	0.02409	0.01844							-0.24173	0.07014	1
		1762	0.0207	0.00517							-0.24096	0.07105	1
		1761.5	0.00556	-0.02937							-0.24017	0.07195	1
		1761	-0.0117	-0.04336							-0.23938	0.07286	1
		1760.5	-0.01327	-0.01428							-0.23858	0.07376	1
		1760	0.000653019	0.00656							-0.23777	0.07465	1
		1759.5	-0.00482	0.00887							-0.23695	0.07555	1
		1759	-0.01565	0.0036							-0.23612	0.07644	1
		1758.5	-0.0062	-0.000260372							-0.23528	0.07732	1
		1758	0.01017	0.00807							-0.23443	0.07821	1
		1757.5	0.01861	0.0335							-0.23357	0.07909	1
		1757	0.01491	0.03574							-0.23271	0.07997	1
		1756.5	0.0028	-0.00938							-0.23183	0.08084	1
		1756	-0.01135	-0.03752							-0.23095	0.08171	1
		1755.5	-0.01703	-0.02056							-0.23005	0.08258	1
		1755	-0.00953	0.00358							-0.22915	0.08344	1
		1754.5	-0.00163	0.01013							-0.22824	0.0843	1
		1754	-0.00545	0.00146							-0.22732	0.08516	1
		1753.5	-0.0122	-0.00318							-0.22639	0.08601	1
		1753	-0.00492	-0.01183							-0.22546	0.08686	1
		1752.5	0.02075	-0.01401							-0.22451	0.0877	1
		1752	0.0433	0.01396							-0.22356	0.08855	1
		1751.5	0.02544	0.02785							-0.22259	0.08938	1
		1751	-0.01154	-0.00515							-0.22162	0.09022	1
		1750.5	-0.02084	-0.03498							-0.22064	0.09105	1
		1750	-0.00414	-0.00864							-0.21965	0.09188	1
		1749.5	0.01315	0.03152							-0.21865	0.0927	1
		1749	0.01388	0.0345							-0.21765	0.09352	1
		1748.5	-0.00453	0.01359							-0.21663	0.09433	1
		1748	-0.02294	0.00349							-0.21561	0.09514	1
		1747.5	-0.01837	-5.22317e-05							-0.21458	0.09595	1
		1747	-0.00422	-0.01453							-0.21354	0.09675	1
		1746.5	0.01331	-0.02263							-0.21249	0.09755	1
		1746	0.02576	-0.0235							-0.21144	0.09834	1
		1745.5	0.00619	-0.01967							-0.21037	0.09913	1
		1745	-0.01484	-0.00732							-0.2093	0.09992	1
		1744.5	-0.00712	0.01235							-0.20822	0.1007	1
		1744	0.00352	0.03042							-0.20713	0.10148	1
		1743.5	0.00974	0.02405							-0.20604	0.10225	1
		1743	0.00876	-0.00222							-0.20493	0.10302	1
		1742.5	-0.00888	-0.01672							-0.20382	0.10379	1
		1742	-0.01723	-0.00473							-0.2027	0.10455	1
		1741.5	0.00219	0.00462							-0.20157	0.1053	1
		1741	0.03022	-0.00519							-0.20044	0.10606	1
		1740.5	0.03812	0.00312							-0.19929	0.1068	1
		1740	0.00891	0.01234							-0.19814	0.10755	1
		1739.5	-0.03841	-0.01165							-0.19698	0.10828	1
		1739	-0.04943	-0.03012							-0.19582	0.10902	1
		1738.5	-0.01314	-0.01476							-0.19464	0.10975	1
		1738	0.02139	0.01011							-0.19346	0.11047	1
		1737.5	0.01621	0.01026							-0.19227	0.11119	1
		1737	-0.00653	0.00136							-0.19108	0.11191	1
		1736.5	-0.00906	0.00234							-0.18987	0.11262	1
		1736	0.01505	-0.00752							-0.18866	0.11332	1
		1735.5	0.05672	-0.03156							-0.18745	0.11402	1
		1735	0.06777	-0.0271							-0.18622	0.11472	1
		1734.5	0.02037	-0.00988							-0.18499	0.11541	1
		1734	-0.02548	-0.03475							-0.18375	0.1161	1
		1733.5	-0.03947	-0.03298							-0.1825	0.11678	1
		1733	-0.04188	0.02453							-0.18125	0.11746	1
		1732.5	-0.02952	0.04491							-0.17999	0.11813	1
		1732	-0.00899	0.01239							-0.17872	0.1188	1
		1731.5	0.00801	-0.00533							-0.17745	0.11946	1
		1731	0.00792	0.01807							-0.17616	0.12012	1
		1730.5	-0.00335	0.04097							-0.17488	0.12077	1
		1730	-0.00504	0.02908							-0.17358	0.12142	1
		1729.5	-0.00112	-0.005							-0.17228	0.12206	1
		1729	-0.00196	-0.0264							-0.17097	0.1227	1
		1728.5	-0.00401	-0.02203							-0.16966	0.12333	1
		1728	0.00343	-0.00686							-0.16834	0.12396	1
		1727.5	0.00789	0.00195							-0.16701	0.12458	1
		1727	0.00776	-0.00503							-0.16567	0.12519	1
		1726.5	0.00393	-0.01068							-0.16433	0.12581	1
		1726	-0.00227	-0.00942							-0.16299	0.12641	1
		1725.5	-0.00497	-0.000842642							-0.16164	0.12701	1
		1725	-0.01146	0.00609							-0.16028	0.12761	1
		1724.5	-0.0046	0.00431							-0.15891	0.1282	1
		1724	0.0085	0.0133							-0.15754	0.12878	1
		1723.5	0.00789	0.01836							-0.15616	0.12936	1
		1723	0.00339	0.00778							-0.15478	0.12994	1
		1722.5	0.00405	-0.00752							-0.15339	0.13051	1
		1722	0.01029	-0.02174							-0.15199	0.13107	1
		1721.5	0.00109	-0.02502							-0.15059	0.13163	1
		1721	-0.01755	-0.00829							-0.14919	0.13218	1
		1720.5	-0.01761	0.01301							-0.14777	0.13273	1
		1720	-0.00281	0.023							-0.14636	0.13327	1
		1719.5	0.01674	0.03068							-0.14493	0.13381	1
		1719	0.02365	0.03213							-0.1435	0.13434	1
		1718.5	0.02228	0.01952							-0.14207	0.13486	1
		1718	0.01743	-0.02534							-0.14063	0.13538	1
		1717.5	-0.00936	-0.07388							-0.13918	0.1359	1
		1717	-0.03494	-0.04819							-0.13773	0.1364	1
		1716.5	-0.02712	0.00836							-0.13628	0.13691	1
		1716	0.01056	0.02123							-0.13482	0.1374	1
		1715.5	0.03715	0.01859							-0.13335	0.13789	1
		1715	0.02142	0.03131							-0.13188	0.13838	1
		1714.5	-0.00768	0.02799							-0.1304	0.13886	1
		1714	-0.01817	-0.00425							-0.12892	0.13933	1
		1713.5	-0.01327	-0.02926							-0.12743	0.1398	1
		1713	-0.00536	-0.02329							-0.12594	0.14026	1
		1712.5	-0.0014	-0.00399							-0.12445	0.14072	1
		1712	0.00464	0.00275							-0.12295	0.14117	1
		1711.5	0.00765	0.00537							-0.12144	0.14162	1
		1711	0.00535	0.00468							-0.11993	0.14206	1
		1710.5	0.00556	0.0116							-0.11842	0.14249	1
		1710	-0.00317	0.01414							-0.1169	0.14292	1
		1709.5	-0.00911	-0.00234							-0.11537	0.14334	1
		1709	-0.00615	-0.00338							-0.11385	0.14375	1
		1708.5	-0.00769	0.00487							-0.11231	0.14416	1
		1708	0.00564	0.00557							-0.11078	0.14457	1
		1707.5	0.03145	0.0045							-0.10924	0.14497	1
		1707	0.02313	-0.00616							-0.10769	0.14536	1
		1706.5	-0.00931	-0.01694							-0.10614	0.14574	1
		1706	-0.02147	-0.00477							-0.10459	0.14612	1
		1705.5	-0.01593	0.02049							-0.10303	0.1465	1
		1705	-0.00559	0.02307							-0.10147	0.14686	1
		1704.5	-0.000131475	0.000108076							-0.09991	0.14723	1
		1704	-0.00474	-0.0165							-0.09834	0.14758	1
		1703.5	-0.01955	-0.01152							-0.09677	0.14793	1
		1703	-0.0319	0.02199							-0.09519	0.14827	1
		1702.5	-0.02162	0.06084							-0.09361	0.14861	1
		1702	0.0347	0.04301							-0.09203	0.14894	1
		1701.5	0.12165	-0.01967							-0.09045	0.14927	1
		1701	0.12197	-0.02056							-0.08886	0.14959	1
		1700.5	-0.0036	-0.04349							-0.08726	0.1499	1
		1700	-0.10793	-0.1385							-0.08567	0.15021	1
		1699.5	-0.10713	-0.07958							-0.08407	0.15051	1
		1699	-0.05123	0.063							-0.08247	0.1508	1
		1698.5	0.0015	0.08166							-0.08086	0.15109	1
		1698	0.01955	0.03654							-0.07925	0.15137	1
		1697.5	0.03902	-0.00305							-0.07764	0.15165	1
		1697	0.09032	-0.01049							-0.07603	0.15192	1
		1696.5	0.11671	0.03208							-0.07441	0.15218	1
		1696	0.05254	0.04842							-0.07279	0.15243	1
		1695.5	-0.06767	-0.0107							-0.07117	0.15269	1
		1695	-0.11651	-0.04298							-0.06954	0.15293	1
		1694.5	-0.05307	-0.00898							-0.06792	0.15317	1
		1694	0.01805	0.00854							-0.06629	0.1534	1
		1693.5	0.03735	0.00075685							-0.06465	0.15362	1
		1693	0.02549	-0.00133							-0.06302	0.15384	1
		1692.5	0.00579	-0.00708							-0.06138	0.15405	1
		1692	0.00617	-0.01078							-0.05974	0.15426	1
		1691.5	0.01225	0.00613							-0.0581	0.15446	1
		1691	0.00376	0.01915							-0.05646	0.15465	1
		1690.5	-0.00514	0.0014							-0.05481	0.15484	1
		1690	-0.01034	-0.01342							-0.05316	0.15502	1
		1689.5	-0.00558	0.00295							-0.05152	0.1552	1
		1689	0.007	0.01895							-0.04986	0.15536	1
		1688.5	0.00814	0.01797							-0.04821	0.15553	1
		1688	-0.00348	0.00891							-0.04656	0.15568	1
		1687.5	-0.02711	-0.00539							-0.0449	0.15583	1
		1687	-0.04429	-0.00455							-0.04324	0.15597	1
		1686.5	-0.01429	-0.01355							-0.04158	0.15611	1
		1686	0.06577	-0.05424							-0.03992	0.15624	1
		1685.5	0.12383	-0.03886							-0.03826	0.15636	1
		1685	0.06472	0.09222							-0.03659	0.15648	1
		1684.5	-0.05406	0.15686							-0.03493	0.15659	1
		1684	-0.0823	0.00542							-0.03326	0.15669	1
		1683.5	-0.03955	-0.13748							-0.0316	0.15679	1
		1683	-0.03103	-0.10903							-0.02993	0.15688	1
		1682.5	-0.03288	-0.03323							-0.02826	0.15696	1
		1682	-0.00401	0.01578							-0.02659	0.15704	1
		1681.5	0.02198	0.05265							-0.02492	0.15711	1
		1681	0.03257	0.06443							-0.02325	0.15718	1
		1680.5	0.03042	0.03146							-0.02157	0.15724	1
		1680	0.00936	-0.0208							-0.0199	0.15729	1
		1679.5	-0.0135	-0.04572							-0.01823	0.15733	1
		1679	-0.01907	-0.02441							-0.01655	0.15737	1
		1678.5	-0.01243	0.01663							-0.01488	0.15741	1
		1678	-0.01455	0.03708							-0.0132	0.15743	1
		1677.5	-0.02165	0.04185							-0.01153	0.15745	1
		1677	-0.00262	0.02465							-0.00985	0.15746	1
		1676.5	0.04042	-0.01085							-0.00817	0.15747	1
		1676	0.06716	-0.03234							-0.0065	0.15747	1
		1675.5	0.02837	-0.0457							-0.00482	0.15747	1
		1675	-0.05026	-0.04668							-0.00314	0.15745	1
		1674.5	-0.07716	-0.01518							-0.00147	0.15743	1
		1674	-0.03852	0.02322							0.000207156	0.15741	1
		1673.5	0.0129	0.02121							0.00188	0.15738	1
		1673	0.03901	0.00215							0.00356	0.15734	1
		1672.5	0.02441	0.00713							0.00523	0.15729	1
		1672	-0.00979	0.02135							0.00691	0.15724	1
		1671.5	-0.02773	0.02457							0.00858	0.15718	1
		1671	-0.02049	0.00635							0.01026	0.15712	1
		1670.5	0.0089	-0.03727							0.01193	0.15705	1
		1670	0.0379	-0.05378							0.0136	0.15697	1
		1669.5	0.02619	-0.01518							0.01527	0.15689	1
		1669	-0.02371	0.01459							0.01694	0.1568	1
		1668.5	-0.0481	0.01582							0.01861	0.1567	1
		1668	-0.02407	0.01778							0.02028	0.1566	1
		1667.5	0.00447	0.01434							0.02195	0.15649	1
		1667	0.01633	-0.00417							0.02362	0.15637	1
		1666.5	0.00801	-0.0194							0.02529	0.15625	1
		1666	-0.00964	-0.01076							0.02695	0.15612	1
		1665.5	-0.01449	0.01368							0.02861	0.15598	1
		1665	-0.00723	0.0248							0.03028	0.15584	1
		1664.5	0.01054	0.02039							0.03194	0.15569	1
		1664	0.04051	-0.000802813							0.0336	0.15554	1
		1663.5	0.04308	-0.02925							0.03525	0.15538	1
		1663	-0.00946	-0.02265							0.03691	0.15521	1
		1662.5	-0.05959	0.00499							0.03856	0.15504	1
		1662	-0.05063	0.01344							0.04022	0.15485	1
		1661.5	-0.0096	0.00298							0.04187	0.15467	1
		1661	0.01603	-0.01073							0.04352	0.15448	1
		1660.5	0.01744	-0.01096							0.04516	0.15428	1
		1660	0.00693	0.00143							0.04681	0.15407	1
		1659.5	-0.00108	0.00661							0.04845	0.15386	1
		1659	0.00166	0.00198							0.05009	0.15364	1
		1658.5	0.00948	-0.0044							0.05173	0.15342	1
		1658	0.01001	-0.00308							0.05337	0.15318	1
		1657.5	-0.00241	0.00755							0.055	0.15295	1
		1657	-0.02208	0.02979							0.05664	0.1527	1
		1656.5	-0.02804	0.04415							0.05827	0.15245	1
		1656	-0.02031	0.03805							0.05989	0.1522	1
		1655.5	-0.01087	0.01618							0.06152	0.15193	1
		1655	0.00774	-0.03588							0.06314	0.15167	1
		1654.5	0.04001	-0.10857							0.06476	0.15139	1
		1654	0.07803	-0.1109							0.06638	0.15111	1
		1653.5	0.07877	0.00387							0.06799	0.15082	1
		1653	0.00474	0.06117							0.0696	0.15053	1
		1652.5	-0.09817	0.02844							0.07121	0.15023	1
		1652	-0.12692	0.04495							0.07281	0.14992	1
		1651.5	-0.06238	0.04785							0.07441	0.14961	1
		1651	-0.00355	0.00125							0.07601	0.14929	1
		1650.5	0.00778	-0.01914							0.07761	0.14897	1
		1650	0.00867	-0.01072							0.0792	0.14864	1
		1649.5	0.00917	-0.00485							0.08079	0.1483	1
		1649	0.01216	-0.015							0.08237	0.14796	1
		1648.5	0.01573	-0.01569							0.08396	0.14761	1
		1648	0.00888	-0.00178							0.08553	0.14725	1
		1647.5	0.00723	-0.01772							0.08711	0.14689	1
		1647	0.01416	-0.06214							0.08868	0.14652	1
		1646.5	0.00968	-0.05452							0.09025	0.14615	1
		1646	-0.00765	0.01305							0.09181	0.14577	1
		1645.5	-0.02462	0.0606							0.09337	0.14539	1
		1645	-0.03389	0.04909							0.09493	0.14499	1
		1644.5	-0.02633	-0.00354							0.09648	0.1446	1
		1644	-0.00479	-0.03947							0.09803	0.14419	1
		1643.5	0.00588	-0.02718							0.09957	0.14378	1
		1643	0.00281	0.00487							0.10111	0.14337	1
		1642.5	-0.00131	0.02702							0.10265	0.14295	1
		1642	-0.00357	0.0292							0.10418	0.14252	1
		1641.5	-0.00352	0.01998							0.10571	0.14209	1
		1641	-0.00475	0.0096							0.10723	0.14165	1
		1640.5	-0.00593	-0.00458							0.10875	0.14121	1
		1640	-0.01395	-0.00959							0.11026	0.14075	1
		1639.5	-0.02081	-0.0043							0.11177	0.1403	1
		1639	-0.01175	-0.00413							0.11327	0.13984	1
		1638.5	-0.00987	0.00147							0.11477	0.13937	1
		1638	-0.00739	0.02906							0.11627	0.13889	1
		1637.5	0.00568	0.04466							0.11776	0.13842	1
		1637	0.01847	-0.00186							0.11924	0.13793	1
		1636.5	0.02831	-0.1143							0.12072	0.13744	1
		1636	0.00768	-0.16062							0.1222	0.13694	1
		1635.5	-0.02313	-0.03565							0.12367	0.13644	1
		1635	-0.03108	0.09858							0.12514	0.13593	1
		1634.5	-0.03073	0.09691							0.1266	0.13542	1
		1634	-0.01844	0.03358							0.12805	0.1349	1
		1633.5	0.00361	-0.00139							0.1295	0.13438	1
		1633	0.019	-0.00964							0.13095	0.13385	1
		1632.5	0.01757	-0.01053							0.13239	0.13331	1
		1632	-0.00401	-0.00144							0.13382	0.13277	1
		1631.5	-0.02512	0.01697							0.13525	0.13222	1
		1631	-0.03448	0.03388							0.13667	0.13167	1
		1630.5	-0.02916	0.03349							0.13809	0.13111	1
		1630	-0.00185	0.01256							0.1395	0.13055	1
		1629.5	0.02449	-0.00864							0.1409	0.12998	1
		1629	0.02217	-0.0166							0.1423	0.12941	1
		1628.5	-0.00459	-0.01346							0.1437	0.12883	1
		1628	-0.01104	-0.000170807							0.14509	0.12824	1
		1627.5	0.00956	0.01441							0.14647	0.12765	1
		1627	0.01697	0.01879							0.14785	0.12706	1
		1626.5	0.00812	0.00959							0.14922	0.12646	1
		1626	-0.00617	0.0086							0.15058	0.12585	1
		1625.5	-0.00242	0.01606							0.15194	0.12524	1
		1625	0.00975	-0.00441							0.15329	0.12462	1
		1624.5	0.00106	-0.04464							0.15464	0.124	1
		1624	-0.00783	-0.05392							0.15597	0.12337	1
		1623.5	-0.0036	-0.01084							0.15731	0.12274	1
		1623	0.00569	0.04261							0.15863	0.12211	1
		1622.5	0.0137	0.06054							0.15995	0.12146	1
		1622	0.02115	0.04302							0.16127	0.12082	1
		1621.5	0.02395	0.02363							0.16257	0.12017	1
		1621	0.018	0.02674							0.16387	0.11951	1
		1620.5	0.01498	0.02588							0.16517	0.11885	1
		1620	0.01571	0.00977							0.16645	0.11818	1
		1619.5	0.00931	0.0114							0.16773	0.11751	1
		1619	0.00134	0.00657							0.16901	0.11683	1
		1618.5	0.02051	-0.0263							0.17027	0.11615	1
		1618	0.08752	-0.09134							0.17153	0.11546	1
		1617.5	0.14808	-0.12886							0.17279	0.11477	1
		1617	0.08712	-0.03152							0.17403	0.11408	1
		1616.5	-0.06128	0.09638							0.17527	0.11337	1
		1616	-0.1166	0.11959							0.1765	0.11267	1
		1615.5	-0.04599	0.06704							0.17773	0.11196	1
		1615	0.03272	0.01287							0.17894	0.11124	1
		1614.5	0.05131	-0.0056							0.18015	0.11052	1
		1614	0.03872	-0.01427							0.18135	0.1098	1
		1613.5	0.03333	-0.03192							0.18255	0.10907	1
		1613	0.02513	-0.02752							0.18374	0.10834	1
		1612.5	0.01419	-0.01329							0.18492	0.1076	1
		1612	0.00821	-0.01398							0.18609	0.10686	1
		1611.5	-0.01068	-0.00871							0.18725	0.10611	1
		1611	-0.02554	-0.01179							0.18841	0.10536	1
		1610.5	-0.01702	-0.01106							0.18956	0.1046	1
		1610	-0.00689	0.00762							0.1907	0.10384	1
		1609.5	0.000315432	0.01441							0.19184	0.10308	1
		1609	0.00172	0.00209							0.19296	0.10231	1
		1608.5	-0.00895	-0.00891							0.19408	0.10154	1
		1608	-0.01512	0.000919859							0.19519	0.10076	1
		1607.5	-0.00393	0.01026							0.19629	0.09998	1
		1607	0.00449	-0.00501							0.19739	0.09919	1
		1606.5	-0.000822273	-0.02206							0.19848	0.0984	1
		1606	-0.00139	-0.02213							0.19956	0.09761	1
		1605.5	-0.00344	-0.02082							0.20063	0.09681	1
		1605	-0.01186	-0.02004							0.20169	0.09601	1
		1604.5	-0.01411	-0.00434							0.20274	0.0952	1
		1604	-0.00978	0.02419							0.20379	0.09439	1
		1603.5	-0.00773	0.02275							0.20483	0.09358	1
		1603	-0.00855	-0.00412							0.20586	0.09276	1
		1602.5	-0.01459	-0.01539							0.20688	0.09194	1
		1602	-0.02227	-0.01842							0.20789	0.09111	1
		1601.5	-0.02815	-0.0124							0.2089	0.09028	1
		1601	-0.03508	-0.00562							0.20989	0.08945	1
		1600.5	-0.02694	-0.0042							0.21088	0.08861	1
		1600	-0.00366	-0.00585							0.21186	0.08777	1
		1599.5	0.01143	-0.01803							0.21283	0.08692	1
		1599	-0.00222	-0.01812							0.21379	0.08607	1
		1598.5	-0.02636	-0.00819							0.21474	0.08522	1
		1598	-0.03387	-0.00796							0.21569	0.08436	1
		1597.5	-0.02585	-0.00356							0.21662	0.0835	1
		1597	-0.01734	0.00855							0.21755	0.08264	1
		1596.5	-0.01987	0.00968							0.21847	0.08178	1
		1596	-0.01826	0.00586							0.21938	0.0809	1
		1595.5	-0.0129	0.000623123							0.22028	0.08003	1
		1595	-0.0127	-0.01687							0.22117	0.07915	1
		1594.5	-0.00386	-0.0341							0.22205	0.07827	1
		1594	0.014	-0.0271							0.22293	0.07739	1
		1593.5	0.01825	0.00419							0.22379	0.0765	1
		1593	0.00757	0.01032							0.22465	0.07561	1
		1592.5	-0.00729	-0.00475							0.22549	0.07472	1
		1592	-0.01942	0.00239							0.22633	0.07382	1
		1591.5	-0.01014	0.01026							0.22716	0.07292	1
		1591	0.00207	0.00619							0.22798	0.07202	1
		1590.5	-0.00235	0.00992							0.22879	0.07111	1
		1590	0.00265	0.01588							0.22959	0.0702	1
		1589.5	0.01424	0.00355							0.23038	0.06929	1
		1589	0.00775	-0.01484							0.23116	0.06838	1
		1588.5	0.00231	-0.02334							0.23193	0.06746	1
		1588	0.00556	-0.01457							0.2327	0.06654	1
		1587.5	0.000433018	0.0116							0.23345	0.06561	1
		1587	-0.00135	0.01965							0.23419	0.06469	1
		1586.5	0.00357	0.0144							0.23493	0.06376	1
		1586	0.00136	0.01348							0.23565	0.06282	1
		1585.5	0.00157	0.00237							0.23637	0.06189	1
		1585	0.01164	-0.01097							0.23708	0.06095	1
		1584.5	0.01449	-0.01014							0.23777	0.06001	1
		1584	0.00748	-0.00291							0.23846	0.05907	1
		1583.5	0.00863	0.00199							0.23914	0.05812	1
		1583	0.01146	0.00309							0.23981	0.05717	1
		1582.5	0.00439	0.00162							0.24046	0.05622	1
		1582	0.00766	0.00886							0.24111	0.05527	1
		1581.5	0.01357	0.01187							0.24175	0.05431	1
		1581	0.0037	0.00195							0.24238	0.05335	1
		1580.5	-0.00601	-0.00999							0.243	0.05239	1
		1580	0.000259889	-0.01092							0.24361	0.05143	1
		1579.5	0.00826	0.000850589							0.24421	0.05047	1
		1579	0.00545	0.02561							0.2448	0.0495	1
		1578.5	0.00465	0.04336							0.24538	0.04853	1
		1578	0.01712	0.02495							0.24595	0.04756	1
		1577.5	0.04888	-0.00658							0.24651	0.04658	1
		1577	0.05789	-0.02074							0.24706	0.04561	1
		1576.5	0.01076	-0.01975							0.2476	0.04463	1
		1576	-0.03985	-0.01307							0.24813	0.04365	1
		1575.5	-0.04054	0.000404985							0.24865	0.04267	1
		1575	-0.00716	0.00946							0.24916	0.04168	1
		1574.5	0.01573	0.01085							0.24966	0.0407	1
		1574	0.02031	0.01136							0.25015	0.03971	1
		1573.5	0.01455	0.01478							0.25063	0.03872	1
		1573	0.01396	0.01265							0.2511	0.03773	1
		1572.5	0.01191	0.00764							0.25156	0.03674	1
		1572	-0.00013902	0.00679							0.25201	0.03574	1
		1571.5	0.00786	0.000293301							0.25245	0.03474	1
		1571	0.0287	-0.01285							0.25288	0.03375	1
		1570.5	0.03232	-0.02552							0.2533	0.03275	1
		1570	0.00899	-0.01155							0.2537	0.03175	1
		1569.5	-0.01448	-0.00392							0.2541	0.03074	1
		1569	-0.01902	-0.01755							0.25449	0.02974	1
		1568.5	-0.01596	-0.01794							0.25487	0.02873	1
		1568	-0.00959	-0.00948							0.25524	0.02773	1
		1567.5	-0.00558	0.01081							0.25559	0.02672	1
		1567	-0.00435	0.02362							0.25594	0.02571	1
		1566.5	0.00681	0.01671							0.25628	0.0247	1
		1566	0.02325	0.01042							0.2566	0.02369	1
		1565.5	0.01969	0.0128							0.25692	0.02267	1
		1565	0.00422	0.01605							0.25723	0.02166	1
		1564.5	-0.0087	-0.00317							0.25752	0.02064	1
		1564	-0.01527	-0.02692							0.25781	0.01963	1
		1563.5	-0.00765	-0.02386							0.25808	0.01861	1
		1563	-0.00535	-0.000254989							0.25835	0.01759	1
		1562.5	-0.0276	0.0345							0.2586	0.01657	1
		1562	-0.04183	0.03627							0.25884	0.01555	1
		1561.5	-0.00924	-0.0157							0.25908	0.01453	1
		1561	0.0554	-0.0734							0.2593	0.01351	1
		1560.5	0.08473	-0.052							0.25951	0.01248	1
		1560	0.04628	0.03656							0.25971	0.01146	1
		1559.5	0.00536	0.05901							0.2599	0.01043	1
		1559	0.00802	0.03057							0.26008	0.00941	1
		1558.5	0.01238	0.01508							0.26025	0.00838	1
		1558	-0.03246	-0.02326							0.26041	0.00736	1
		1557.5	-0.07947	-0.04066							0.26056	0.00633	1
		1557	-0.06567	0.00355							0.2607	0.0053	1
		1556.5	-0.02332	0.02849							0.26083	0.00428	1
		1556	0.02231	0.0148							0.26095	0.00325	1
		1555.5	0.06403	-0.00104							0.26105	0.00222	1
		1555	0.06982	-0.01599							0.26115	0.00119	1
		1554.5	0.02929	-0.02627							0.26124	0.000161364	1
		1554	-0.0252	-0.02279							0.26131	-0.000868077	1
		1553.5	-0.04738	-0.0029							0.26138	-0.0019	1
		1553	-0.03233	0.00648							0.26143	-0.00293	1
		1552.5	-0.01323	-0.002							0.26147	-0.00396	1
		1552	-0.00761	-0.01357							0.26151	-0.00499	1
		1551.5	-0.00243	-0.00496							0.26153	-0.00602	1
		1551	0.01919	0.02702							0.26154	-0.00705	1
		1550.5	0.05038	0.05725							0.26154	-0.00808	1
		1550	0.05113	0.04165							0.26154	-0.00911	1
		1549.5	0.01361	-0.01492							0.26152	-0.01014	1
		1549	-0.02197	-0.04588							0.26149	-0.01117	1
		1548.5	-0.03519	-0.03824							0.26145	-0.0122	1
		1548	-0.03133	-0.00474							0.2614	-0.01323	1
		1547.5	-0.02439	0.01869							0.26133	-0.01426	1
		1547	-0.01194	0.00521							0.26126	-0.01528	1
		1546.5	0.01445	-0.0242							0.26118	-0.01631	1
		1546	0.04279	-0.02162							0.26109	-0.01734	1
		1545.5	0.03651	0.02211							0.26098	-0.01837	1
		1545	-0.01315	0.04985							0.26087	-0.0194	1
		1544.5	-0.05616	0.04502							0.26074	-0.02042	1
		1544	-0.05023	0.02476							0.26061	-0.02145	1
		1543.5	0.00631	0.00811							0.26046	-0.02247	1
		1543	0.06564	-0.00884							0.26031	-0.0235	1
		1542.5	0.06722	-0.02856							0.26014	-0.02452	1
		1542	0.00899	-0.03171							0.25996	-0.02555	1
		1541.5	-0.04205	-0.02183							0.25978	-0.02657	1
		1541	-0.02685	-0.03482							0.25958	-0.02759	1
		1540.5	0.02947	-0.05606							0.25937	-0.02861	1
		1540	0.05517	0.00556							0.25915	-0.02963	1
		1539.5	0.01454	0.08496							0.25892	-0.03065	1
		1539	-0.04498	0.05381							0.25868	-0.03167	1
		1538.5	-0.06738	-0.00495							0.25843	-0.03269	1
		1538	-0.04889	-0.00747							0.25817	-0.0337	1
		1537.5	-0.00481	-0.00477							0.2579	-0.03472	1
		1537	0.02396	-0.00698							0.25762	-0.03573	1
		1536.5	0.0117	0.0116							0.25732	-0.03674	1
		1536	-0.01519	0.02523							0.25702	-0.03776	1
		1535.5	-0.00827	0.00733							0.25671	-0.03877	1
		1535	0.03306	-0.01917							0.25639	-0.03977	1
		1534.5	0.05572	-0.02945							0.25605	-0.04078	1
		1534	0.02514	-0.01891							0.25571	-0.04179	1
		1533.5	-0.03326	-0.01562							0.25536	-0.04279	1
		1533	-0.05418	-0.02258							0.25499	-0.0438	1
		1532.5	-0.0319	0.00235							0.25462	-0.0448	1
		1532	-0.00829	0.03079							0.25423	-0.0458	1
		1531.5	0.000492697	0.02592							0.25384	-0.0468	1
		1531	0.000857469	0.00927							0.25343	-0.0478	1
		1530.5	-0.0011	0.000599797							0.25302	-0.04879	1
		1530	-0.00262	-0.000894394							0.25259	-0.04979	1
		1529.5	-0.00129	-0.00193							0.25215	-0.05078	1
		1529	-3.32686e-05	-0.00496							0.25171	-0.05177	1
		1528.5	-0.00643	-0.01242							0.25125	-0.05276	1
		1528	-0.01862	-0.00735							0.25078	-0.05374	1
		1527.5	-0.01404	0.01051							0.25031	-0.05473	1
		1527	0.00507	-0.00306							0.24982	-0.05571	1
		1526.5	0.01669	-0.02683							0.24932	-0.05669	1
		1526	0.01559	-0.01236							0.24882	-0.05767	1
		1525.5	-0.00175	0.02281							0.2483	-0.05865	1
		1525	-0.02285	0.04434							0.24777	-0.05962	1
		1524.5	-0.02171	0.03451							0.24724	-0.0606	1
		1524	-0.00177	0.00756							0.24669	-0.06157	1
		1523.5	0.01219	-0.01786							0.24613	-0.06254	1
		1523	0.01593	-0.03589							0.24557	-0.0635	1
		1522.5	0.03037	-0.05108							0.24499	-0.06447	1
		1522	0.03538	-0.04563							0.2444	-0.06543	1
		1521.5	0.00889	-0.00144							0.24381	-0.06639	1
		1521	-0.01844	0.0348							0.2432	-0.06735	1
		1520.5	-0.03525	0.0302							0.24259	-0.0683	1
		1520	-0.0436	0.01691							0.24196	-0.06925	1
		1519.5	-0.03869	0.00871							0.24132	-0.0702	1
		1519	-0.00909	-0.0136							0.24068	-0.07115	1
		1518.5	0.0236	-0.02651							0.24002	-0.0721	1
		1518	0.01889	-0.00937							0.23936	-0.07304	1
		1517.5	-0.00468	0.000662363							0.23868	-0.07398	1
		1517	-0.02267	-0.01941							0.238	-0.07491	1
		1516.5	-0.03716	-0.0296							0.23731	-0.07585	1
		1516	-0.04008	-0.00207							0.2366	-0.07678	1
		1515.5	-0.02117	0.02429							0.23589	-0.07771	1
		1515	-0.00404	0.02722							0.23517	-0.07863	1
		1514.5	-0.00796	0.0067							0.23444	-0.07956	1
		1514	-0.01788	-0.03236							0.2337	-0.08048	1
		1513.5	-0.02464	-0.0414							0.23294	-0.08139	1
		1513	-0.02452	-0.00825							0.23218	-0.08231	1
		1512.5	-0.01463	0.01895							0.23141	-0.08322	1
		1512	-0.00361	0.00967							0.23064	-0.08413	1
		1511.5	-0.00906	-0.00797							0.22985	-0.08503	1
		1511	-0.01569	-0.00275							0.22905	-0.08593	1
		1510.5	-0.00773	0.00595							0.22824	-0.08683	1
		1510	-0.00555	0.0087							0.22743	-0.08773	1
		1509.5	-0.00679	0.01229							0.2266	-0.08862	1
		1509	0.00165	0.0101							0.22577	-0.08951	1
		1508.5	0.01292	0.00333							0.22492	-0.09039	1
		1508	0.01806	-0.00744							0.22407	-0.09128	1
		1507.5	0.01209	-0.0138							0.22321	-0.09215	1
		1507	0.01034	0.00139							0.22234	-0.09303	1
		1506.5	0.03164	0.00219							0.22146	-0.0939	1
		1506	0.02607	-0.0298							0.22057	-0.09477	1
		1505.5	-0.0133	-0.02897							0.21967	-0.09564	1
		1505	-0.02722	0.01903							0.21877	-0.0965	1
		1504.5	-0.0186	0.03877							0.21785	-0.09736	1
		1504	-0.00693	0.01693							0.21693	-0.09821	1
		1503.5	-0.000974953	0.00343							0.216	-0.09906	1
		1503	-0.00607	0.000875647							0.21505	-0.09991	1
		1502.5	-0.00694	-0.00323							0.2141	-0.10075	1
		1502	0.005	-0.00438							0.21314	-0.10159	1
		1501.5	0.01846	-0.00141							0.21218	-0.10243	1
		1501	0.0227	0.01465							0.2112	-0.10326	1
		1500.5	0.01466	0.02495							0.21022	-0.10409	1
		1500	0.0062	0.00691							0.20922	-0.10491	1
		1499.5	0.00162	-0.01322							0.20822	-0.10573	1
		1499	-0.00763	-0.02088							0.20721	-0.10655	1
		1498.5	-0.01361	-0.01851							0.20619	-0.10736	1
		1498	-0.01194	-0.00544							0.20517	-0.10817	1
		1497.5	0.000809823	0.00202							0.20413	-0.10898	1
		1497	0.02152	0.01189							0.20309	-0.10978	1
		1496.5	0.01844	0.02582							0.20204	-0.11057	1
		1496	0.00104	0.01118							0.20098	-0.11137	1
		1495.5	-0.00949	-0.0193							0.19991	-0.11215	1
		1495	-0.01606	-0.02347							0.19883	-0.11294	1
		1494.5	-0.00804	-0.00651							0.19775	-0.11372	1
		1494	-0.000910023	0.00426							0.19666	-0.11449	1
		1493.5	0.000352616	0.0166							0.19556	-0.11526	1
		1493	0.00284	0.0178							0.19445	-0.11603	1
		1492.5	-0.00493	0.00144							0.19333	-0.11679	1
		1492	-0.01496	-0.01632							0.19221	-0.11755	1
		1491.5	-0.00842	-0.02673							0.19108	-0.11831	1
		1491	0.01098	-0.000720306							0.18994	-0.11906	1
		1490.5	0.03554	0.04415							0.18879	-0.1198	1
		1490	0.0471	0.03909							0.18763	-0.12054	1
		1489.5	0.02467	-0.01016							0.18647	-0.12128	1
		1489	0.00583	-0.03529							0.1853	-0.12201	1
		1488.5	0.00367	-0.02892							0.18412	-0.12274	1
		1488	-0.00387	-0.00908							0.18294	-0.12346	1
		1487.5	-0.00774	0.01708							0.18175	-0.12418	1
		1487	-0.00565	0.02136							0.18055	-0.12489	1
		1486.5	0.0045	0.00412							0.17934	-0.1256	1
		1486	0.01406	0.00233							0.17813	-0.1263	1
		1485.5	0.01407	0.00978							0.1769	-0.127	1
		1485	0.01222	0.00253							0.17568	-0.12769	1
		1484.5	0.00644	-0.00651							0.17444	-0.12838	1
		1484	2.20352e-05	-0.0019							0.1732	-0.12907	1
		1483.5	-0.00421	0.00889							0.17195	-0.12975	1
		1483	-0.00124	0.00595							0.17069	-0.13042	1
		1482.5	0.00888	0.00358							0.16942	-0.13109	1
		1482	0.01417	0.00929							0.16815	-0.13176	1
		1481.5	0.01196	0.00271							0.16688	-0.13242	1
		1481	0.0047	-0.00539							0.16559	-0.13307	1
		1480.5	-0.00417	-0.00497							0.1643	-0.13372	1
		1480	-0.00309	0.000529423							0.163	-0.13437	1
		1479.5	0.00263	0.01434							0.1617	-0.135	1
		1479	-0.00249	0.02092							0.16039	-0.13564	1
		1478.5	-0.00518	0.00113							0.15907	-0.13627	1
		1478	0.00506	-0.02296							0.15774	-0.13689	1
		1477.5	0.03315	-0.01385							0.15641	-0.13751	1
		1477	0.05559	0.0226							0.15508	-0.13813	1
		1476.5	0.03679	0.02951							0.15373	-0.13874	1
		1476	-0.00764	0.000583235							0.15238	-0.13934	1
		1475.5	-0.03713	-0.01938							0.15103	-0.13994	1
		1475	-0.02928	-0.01182							0.14966	-0.14053	1
		1474.5	0.00279	0.0159							0.1483	-0.14112	1
		1474	0.0318	0.03092							0.14692	-0.1417	1
		1473.5	0.04147	0.01352							0.14554	-0.14228	1
		1473	0.03352	-0.027							0.14416	-0.14285	1
		1472.5	0.00752	-0.05106							0.14276	-0.14342	1
		1472	-0.02466	-0.04232							0.14136	-0.14398	1
		1471.5	-0.04046	-0.01733							0.13996	-0.14453	1
		1471	-0.03534	0.01524							0.13855	-0.14508	1
		1470.5	-0.01872	0.02205							0.13714	-0.14563	1
		1470	0.00145	0.00583							0.13572	-0.14617	1
		1469.5	0.01288	0.00625							0.13429	-0.1467	1
		1469	0.00316	0.00639							0.13286	-0.14723	1
		1468.5	-0.00267	0.00247							0.13142	-0.14775	1
		1468	0.00266	0.00784							0.12998	-0.14827	1
		1467.5	-0.0035	0.00228							0.12853	-0.14878	1
		1467	-0.00918	0.000839743							0.12708	-0.14928	1
		1466.5	0.00815	0.0027							0.12562	-0.14978	1
		1466	0.03541	0.00548							0.12415	-0.15028	1
		1465.5	0.04624	0.01725							0.12268	-0.15076	1
		1465	0.02182	-0.00525							0.12121	-0.15125	1
		1464.5	-0.02472	-0.03192							0.11973	-0.15172	1
		1464	-0.04666	-0.0111							0.11825	-0.15219	1
		1463.5	-0.02229	0.01147							0.11676	-0.15266	1
		1463	0.01553	0.0086							0.11526	-0.15312	1
		1462.5	0.02622	0.00684							0.11377	-0.15357	1
		1462	0.01881	-0.000921369							0.11226	-0.15402	1
		1461.5	0.009	-0.00719							0.11076	-0.15446	1
		1461	3.37986e-05	0.01157							0.10924	-0.1549	1
		1460.5	-0.00317	0.01721							0.10773	-0.15533	1
		1460	-0.000432093	0.01312							0.10621	-0.15576	1
		1459.5	0.000439716	0.02315							0.10468	-0.15617	1
		1459	-0.00887	0.01967							0.10315	-0.15659	1
		1458.5	0.00478	0.000959987							0.10162	-0.15699	1
		1458	0.06648	-0.00705							0.10008	-0.15739	1
		1457.5	0.11203	-0.00569							0.09853	-0.15779	1
		1457	0.04108	-0.02086							0.09699	-0.15818	1
		1456.5	-0.09798	-0.03926							0.09544	-0.15856	1
		1456	-0.13134	-0.01733							0.09388	-0.15894	1
		1455.5	-0.0427	0.01295							0.09232	-0.15931	1
		1455	0.03874	-0.00347							0.09076	-0.15967	1
		1454.5	0.04803	-0.01856							0.0892	-0.16003	1
		1454	0.01369	0.00361							0.08763	-0.16038	1
		1453.5	-0.00927	0.0233							0.08605	-0.16073	1
		1453	2.69423e-05	0.02792							0.08447	-0.16107	1
		1452.5	0.01183	0.01904							0.08289	-0.1614	1
		1452	0.01238	-0.00698							0.08131	-0.16173	1
		1451.5	0.00755	-0.00915							0.07972	-0.16205	1
		1451	-0.00896	0.01719							0.07813	-0.16237	1
		1450.5	-0.03046	0.0196							0.07654	-0.16268	1
		1450	-0.03104	0.00749							0.07494	-0.16298	1
		1449.5	0.002	0.00552							0.07334	-0.16328	1
		1449	0.03448	0.000572133							0.07173	-0.16357	1
		1448.5	0.02722	-0.01003							0.07013	-0.16386	1
		1448	-0.01299	-0.01805							0.06852	-0.16414	1
		1447.5	-0.03237	-0.02588							0.06691	-0.16441	1
		1447	-0.01906	-0.01587							0.06529	-0.16467	1
		1446.5	-0.00587	0.01198							0.06367	-0.16493	1
		1446	0.00123	0.01856							0.06205	-0.16519	1
		1445.5	-0.00598	0.00986							0.06043	-0.16543	1
		1445	-0.01767	-0.00902							0.0588	-0.16568	1
		1444.5	-0.02143	-0.02193							0.05717	-0.16591	1
		1444	-0.01774	-0.0076							0.05554	-0.16614	1
		1443.5	-0.00833	-0.000936767							0.05391	-0.16636	1
		1443	-0.0091	0.000631135							0.05227	-0.16658	1
		1442.5	-0.01693	0.00884							0.05063	-0.16679	1
		1442	-0.02602	-0.000795409							0.04899	-0.16699	1
		1441.5	-0.01953	-0.02079							0.04735	-0.16718	1
		1441	-0.00209	-0.0285							0.04571	-0.16737	1
		1440.5	-0.00519	-0.02518							0.04406	-0.16756	1
		1440	-0.02026	-0.00681							0.04241	-0.16774	1
		1439.5	-0.03227	0.01166							0.04076	-0.16791	1
		1439	-0.03778	0.01067							0.03911	-0.16807	1
		1438.5	-0.02286	-0.005							0.03745	-0.16823	1
		1438	0.000891856	-0.02685							0.0358	-0.16838	1
		1437.5	0.00144	-0.01648							0.03414	-0.16853	1
		1437	-0.00883	0.00529							0.03248	-0.16867	1
		1436.5	-0.01089	-0.01106							0.03082	-0.1688	1
		1436	-0.01584	-0.02595							0.02916	-0.16893	1
		1435.5	-0.01565	-0.01524							0.0275	-0.16905	1
		1435	-0.00452	-0.00943							0.02583	-0.16916	1
		1434.5	-0.000821695	-0.00742							0.02417	-0.16927	1
		1434	-0.00877	-0.00258							0.0225	-0.16937	1
		1433.5	-0.01772	0.00185							0.02083	-0.16946	1
		1433	-0.01325	0.00988							0.01916	-0.16955	1
		1432.5	-0.00499	0.000895557							0.01749	-0.16963	1
		1432	-0.00729	-0.00813							0.01582	-0.1697	1
		1431.5	-0.00225	0.00325							0.01415	-0.16977	1
		1431	0.01365	-0.00285							0.01248	-0.16983	1
		1430.5	0.01374	-0.01513							0.01081	-0.16989	1
		1430	-0.00281	-0.00638							0.00913	-0.16994	1
		1429.5	-0.00483	-0.005							0.00746	-0.16998	1
		1429	0.00484	-0.00227							0.00578	-0.17002	1
		1428.5	0.00396	0.01125							0.00411	-0.17005	1
		1428	-0.000866293	0.01198							0.00243	-0.17007	1
		1427.5	-0.000247168	-0.00167							0.000757523	-0.17009	1
		1427	0.00668	-0.00804							-0.000918403	-0.1701	1
		1426.5	0.01162	0.00278							-0.00259	-0.1701	1
		1426	0.00304	-0.00267							-0.00427	-0.1701	1
		1425.5	-0.00524	-0.01846							-0.00595	-0.17009	1
		1425	0.00666	5.90386e-05							-0.00762	-0.17007	1
		1424.5	0.02389	0.03677							-0.0093	-0.17005	1
		1424	0.03105	0.03838							-0.01098	-0.17002	1
		1423.5	0.02803	0.0141							-0.01265	-0.16998	1
		1423	0.00747	-0.00337							-0.01433	-0.16994	1
		1422.5	-0.01274	-0.01577							-0.016	-0.16989	1
		1422	-0.01647	-0.01439							-0.01768	-0.16984	1
		1421.5	-0.00304	-0.000951506							-0.01935	-0.16978	1
		1421	0.02285	-0.00673							-0.02102	-0.16971	1
		1420.5	0.03997	-0.00278							-0.0227	-0.16964	1
		1420	0.03364	0.03892							-0.02437	-0.16955	1
		1419.5	0.0121	0.04087							-0.02604	-0.16947	1
		1419	0.000871741	-0.01018							-0.02771	-0.16937	1
		1418.5	-0.00819	-0.03101							-0.02938	-0.16927	1
		1418	-0.00978	-0.00939							-0.03105	-0.16917	1
		1417.5	0.00496	0.01687							-0.03272	-0.16905	1
		1417	0.00705	0.02638							-0.03438	-0.16894	1
		1416.5	0.00431	0.01243							-0.03605	-0.16881	1
		1416	0.00531	-0.000943922							-0.03771	-0.16868	1
		1415.5	0.00324	-0.00346							-0.03937	-0.16854	1
		1415	0.0034	-0.00565							-0.04104	-0.16839	1
		1414.5	0.00284	-0.00768							-0.0427	-0.16824	1
		1414	-0.00467	-0.01355							-0.04435	-0.16808	1
		1413.5	-0.00293	-0.00979							-0.04601	-0.16792	1
		1413	0.01261	0.01187							-0.04767	-0.16775	1
		1412.5	0.01209	0.02337							-0.04932	-0.16757	1
		1412	0.00827	0.01871							-0.05097	-0.16739	1
		1411.5	0.01476	0.01085							-0.05262	-0.1672	1
		1411	0.00178	0.000501498							-0.05427	-0.167	1
		1410.5	-0.01115	-0.00776							-0.05592	-0.1668	1
		1410	-0.00251	-0.01369							-0.05756	-0.16659	1
		1409.5	-0.00189	-0.0096							-0.0592	-0.16638	1
		1409	0.000520415	0.000854135							-0.06084	-0.16615	1
		1408.5	0.01193	0.00568							-0.06248	-0.16593	1
		1408	0.01003	0.00459							-0.06412	-0.16569	1
		1407.5	0.00379	-0.00865							-0.06575	-0.16545	1
		1407	-0.00145	-0.01801							-0.06738	-0.16521	1
		1406.5	-0.008	-4.24279e-06							-0.06901	-0.16495	1
		1406	-0.00915	0.03082							-0.07064	-0.16469	1
		1405.5	0.000154114	0.03808							-0.07226	-0.16443	1
		1405	0.01252	0.01463							-0.07388	-0.16416	1
		1404.5	0.01634	-0.00743							-0.0755	-0.16388	1
		1404	0.01273	-0.01463							-0.07711	-0.16359	1
		1403.5	0.0041	-0.02253							-0.07872	-0.1633	1
		1403	-0.00358	-0.02299							-0.08033	-0.16301	1
		1402.5	-0.00148	-0.00323							-0.08194	-0.1627	1
		1402	-0.00181	0.01543							-0.08354	-0.16239	1
		1401.5	-0.01752	0.01616							-0.08514	-0.16208	1
		1401	-0.01766	0.00701							-0.08674	-0.16176	1
		1400.5	0.00465	0.00317							-0.08833	-0.16143	1
		1400	0.01234	0.00976							-0.08992	-0.1611	1
		1399.5	0.01061	0.00836							-0.09151	-0.16076	1
		1399	0.00333	-0.00988							-0.0931	-0.16041	1
		1398.5	-0.006	-0.02173							-0.09468	-0.16006	1
		1398	-0.00464	-0.01824							-0.09625	-0.1597	1
		1397.5	-0.00685	-0.00517							-0.09783	-0.15933	1
		1397	-0.0107	0.000515016							-0.09939	-0.15896	1
		1396.5	-0.00791	-0.000881138							-0.10096	-0.15859	1
		1396	0.00267	0.01006							-0.10252	-0.15821	1
		1395.5	0.01879	0.01758							-0.10408	-0.15782	1
		1395	0.02876	0.01868							-0.10563	-0.15742	1
		1394.5	0.01845	0.00884							-0.10718	-0.15702	1
		1394	-0.0103	-0.01198							-0.10873	-0.15662	1
		1393.5	-0.02952	-0.02146							-0.11027	-0.1562	1
		1393	-0.01875	-0.01827							-0.11181	-0.15579	1
		1392.5	0.00397	-0.0027							-0.11334	-0.15536	1
		1392	0.00325	0.01063							-0.11487	-0.15493	1
		1391.5	-0.00687	0.014							-0.1164	-0.1545	1
		1391	0.00239	0.01627							-0.11792	-0.15405	1
		1390.5	0.000848794	0.00514							-0.11943	-0.15361	1
		1390	-0.01662	-0.0079							-0.12094	-0.15315	1
		1389.5	-0.0211	-0.01414							-0.12245	-0.15269	1
		1389	-0.01048	-0.02246							-0.12395	-0.15223	1
		1388.5	0.00763	-0.0017							-0.12545	-0.15176	1
		1388	0.0194	0.03031							-0.12694	-0.15128	1
		1387.5	0.01439	0.01622							-0.12843	-0.1508	1
		1387	-0.00322	-0.01725							-0.12991	-0.15031	1
		1386.5	-0.01365	-0.02413							-0.13139	-0.14982	1
		1386	-0.0097	-0.00352							-0.13287	-0.14932	1
		1385.5	-0.00439	0.02059							-0.13433	-0.14881	1
		1385	-0.0034	0.0241							-0.1358	-0.1483	1
		1384.5	-0.0037	0.0105							-0.13725	-0.14779	1
		1384	-0.00532	-0.00449							-0.13871	-0.14726	1
		1383.5	-0.00755	-0.00692							-0.14015	-0.14674	1
		1383	0.004	-0.00366							-0.1416	-0.1462	1
		1382.5	0.01968	-0.00305							-0.14303	-0.14567	1
		1382	0.01575	0.000964935							-0.14446	-0.14512	1
		1381.5	0.00195	-0.000693114							-0.14589	-0.14457	1
		1381	-0.00474	-0.000415211							-0.14731	-0.14402	1
		1380.5	-0.00295	0.00619							-0.14872	-0.14346	1
		1380	0.00168	0.0039							-0.15013	-0.14289	1
		1379.5	0.00235	-0.00261							-0.15153	-0.14232	1
		1379	0.00308	-0.00322							-0.15293	-0.14174	1
		1378.5	-0.000483347	-0.00254							-0.15432	-0.14116	1
		1378	-0.00651	-0.00929							-0.15571	-0.14057	1
		1377.5	-0.00187	-0.01098							-0.15709	-0.13998	1
		1377	-0.00473	-0.00495							-0.15846	-0.13938	1
		1376.5	-0.00649	-0.00503							-0.15983	-0.13878	1
		1376	-0.00177	0.000747528							-0.16119	-0.13817	1
		1375.5	7.16994e-05	0.00441							-0.16254	-0.13756	1
		1375	0.00607	0.00622							-0.16389	-0.13694	1
		1374.5	0.01326	0.01951							-0.16524	-0.13632	1
		1374	0.0129	0.01252							-0.16657	-0.13569	1
		1373.5	-0.00258	-0.00814							-0.1679	-0.13505	1
		1373	-0.01009	-0.01829							-0.16922	-0.13441	1
		1372.5	-0.00436	-0.01529							-0.17054	-0.13377	1
		1372	-0.00319	-0.00842							-0.17185	-0.13312	1
		1371.5	-0.00698	-0.00907							-0.17315	-0.13246	1
		1371	-0.01038	-0.00416							-0.17445	-0.1318	1
		1370.5	-0.00526	-0.00387							-0.17574	-0.13114	1
		1370	0.00141	-0.00571							-0.17703	-0.13047	1
		1369.5	0.000513026	0.0065							-0.1783	-0.1298	1
		1369	0.00198	0.01541							-0.17957	-0.12912	1
		1368.5	0.00237	0.01842							-0.18083	-0.12843	1
		1368	-0.00519	0.01326							-0.18209	-0.12774	1
		1367.5	-0.01878	0.00978							-0.18334	-0.12705	1
		1367	-0.02413	0.02244							-0.18458	-0.12635	1
		1366.5	-0.00432	0.01469							-0.18582	-0.12565	1
		1366	0.02096	-0.02991							-0.18704	-0.12494	1
		1365.5	0.03269	-0.07235							-0.18826	-0.12423	1
		1365	0.02704	-0.07283							-0.18948	-0.12351	1
		1364.5	0.0111	-0.02173							-0.19068	-0.12279	1
		1364	-0.00449	0.04157							-0.19188	-0.12206	1
		1363.5	-0.01297	0.06146							-0.19307	-0.12133	1
		1363	-0.00573	0.04019							-0.19426	-0.1206	1
		1362.5	0.00121	0.0017							-0.19543	-0.11986	1
		1362	0.00364	-0.0232							-0.1966	-0.11911	1
		1361.5	0.0105	-0.01973							-0.19776	-0.11836	1
		1361	0.01414	-0.01757							-0.19892	-0.11761	1
		1360.5	0.0098	-0.01431							-0.20006	-0.11685	1
		1360	-0.00699	-0.0055							-0.2012	-0.11609	1
		1359.5	-0.02328	0.0116							-0.20233	-0.11532	1
		1359	-0.01954	0.02787							-0.20345	-0.11455	1
		1358.5	-0.01005	0.01761							-0.20457	-0.11378	1
		1358	-0.00493	0.00156							-0.20567	-0.113	1
		1357.5	0.00578	-0.000720228							-0.20677	-0.11221	1
		1357	0.00843	0.00478							-0.20786	-0.11142	1
		1356.5	0.000961805	0.00904							-0.20895	-0.11063	1
		1356	0.00502	0.00938							-0.21002	-0.10984	1
		1355.5	0.00702	0.00422							-0.21109	-0.10904	1
		1355	0.00232	-0.00551							-0.21215	-0.10823	1
		1354.5	0.00682	-0.01392							-0.2132	-0.10742	1
		1354	0.00199	-0.01727							-0.21424	-0.10661	1
		1353.5	-0.00722	-0.01057							-0.21527	-0.10579	1
		1353	-0.00109	-0.00228							-0.2163	-0.10497	1
		1352.5	-0.000509391	-0.00195							-0.21732	-0.10415	1
		1352	-0.0011	-0.00154							-0.21832	-0.10332	1
		1351.5	0.00596	-0.00473							-0.21932	-0.10249	1
		1351	0.00587	-0.01099							-0.22032	-0.10165	1
		1350.5	0.00599	-0.00581							-0.2213	-0.10081	1
		1350	0.00677	0.01057							-0.22227	-0.09997	1
		1349.5	0.00155	0.01856							-0.22324	-0.09912	1
		1349	-0.00907	0.00824							-0.2242	-0.09827	1
		1348.5	-0.01593	-0.00974							-0.22515	-0.09742	1
		1348	-0.01105	-0.00583							-0.22609	-0.09656	1
		1347.5	-0.000651174	0.01184							-0.22702	-0.0957	1
		1347	0.00827	0.0099							-0.22794	-0.09484	1
		1346.5	0.0123	0.00304							-0.22885	-0.09397	1
		1346	0.00721	-0.00997							-0.22976	-0.09309	1
		1345.5	-0.00775	-0.01904							-0.23065	-0.09222	1
		1345	-0.00882	-0.000514669							-0.23154	-0.09134	1
		1344.5	0.0021	0.01097							-0.23242	-0.09046	1
		1344	0.0024	4.65522e-05							-0.23329	-0.08957	1
		1343.5	0.000920879	-0.00828							-0.23415	-0.08868	1
		1343	-0.00167	-0.01741							-0.235	-0.08779	1
		1342.5	-0.00904	-0.01852							-0.23584	-0.0869	1
		1342	-0.01216	0.00633							-0.23667	-0.086	1
		1341.5	-0.01427	0.02445							-0.2375	-0.0851	1
		1341	-0.02008	0.01768							-0.23831	-0.08419	1
		1340.5	-0.01544	0.01366							-0.23912	-0.08328	1
		1340	0.00521	0.01321							-0.23991	-0.08237	1
		1339.5	0.02089	0.000323293							-0.2407	-0.08146	1
		1339	0.01517	-0.01188							-0.24148	-0.08054	1
		1338.5	-0.00241	-0.01341							-0.24225	-0.07962	1
		1338	-0.01421	-0.00451							-0.243	-0.0787	1
		1337.5	-0.01359	0.00933							-0.24375	-0.07778	1
		1337	-0.00905	0.01834							-0.24449	-0.07685	1
		1336.5	-0.00309	0.01365							-0.24522	-0.07592	1
		1336	0.00503	-0.00778							-0.24594	-0.07498	1
		1335.5	0.00232	-0.01601							-0.24665	-0.07405	1
		1335	-0.01031	-0.00382							-0.24736	-0.07311	1
		1334.5	-0.02004	0.00683							-0.24805	-0.07216	1
		1334	-0.01782	0.01279							-0.24873	-0.07122	1
		1333.5	-0.00654	0.01371							-0.2494	-0.07027	1
		1333	-0.00348	0.00207							-0.25007	-0.06932	1
		1332.5	-0.00316	-0.00511							-0.25072	-0.06837	1
		1332	0.00568	0.00804							-0.25136	-0.06742	1
		1331.5	0.00721	0.00426							-0.252	-0.06646	1
		1331	0.00173	-0.00631							-0.25262	-0.0655	1
		1330.5	0.000410148	0.00507							-0.25324	-0.06454	1
		1330	-0.000298785	0.00304							-0.25384	-0.06357	1
		1329.5	-0.00162	-0.00472							-0.25444	-0.06261	1
		1329	-7.89642e-05	-0.00387							-0.25502	-0.06164	1
		1328.5	0.00811	-0.00983							-0.25559	-0.06067	1
		1328	0.00873	-0.00742							-0.25616	-0.0597	1
		1327.5	-0.00639	-0.00461							-0.25671	-0.05872	1
		1327	-0.01931	-0.01582							-0.25726	-0.05774	1
		1326.5	-0.02307	-0.01663							-0.2578	-0.05677	1
		1326	-0.01947	-0.00481							-0.25832	-0.05578	1
		1325.5	-0.02198	-0.000311297							-0.25884	-0.0548	1
		1325	-0.03115	-0.00121							-0.25934	-0.05382	1
		1324.5	-0.03635	-0.01285							-0.25984	-0.05283	1
		1324	-0.04085	-0.03147							-0.26032	-0.05184	1
		1323.5	-0.04678	-0.03737							-0.2608	-0.05085	1
		1323	-0.05351	-0.03215							-0.26126	-0.04986	1
		1322.5	-0.04869	-0.02705							-0.26171	-0.04886	1
		1322	-0.03907	-0.02367							-0.26216	-0.04787	1
		1321.5	-0.03346	-0.01164							-0.26259	-0.04687	1
		1321	-0.02728	-0.00752							-0.26302	-0.04587	1
		1320.5	-0.02548	-0.00796							-0.26343	-0.04487	1
		1320	-0.0255	0.0131							-0.26383	-0.04387	1
		1319.5	-0.00645	0.04076							-0.26423	-0.04287	1
		1319	0.03309	0.0586							-0.26461	-0.04186	1
		1318.5	0.06756	0.05718							-0.26498	-0.04086	1
		1318	0.09466	0.0512							-0.26535	-0.03985	1
		1317.5	0.12577	0.04481							-0.2657	-0.03884	1
		1317	0.15958	0.03117							-0.26604	-0.03783	1
		1316.5	0.18187	0.02856							-0.26637	-0.03682	1
		1316	0.17385	0.02284							-0.26669	-0.03581	1
		1315.5	0.13753	0.01539							-0.267	-0.03479	1
		1315	0.09964	0.01307							-0.26731	-0.03378	1
		1314.5	0.06911	-0.000821376							-0.2676	-0.03276	1
		1314	0.04281	-0.01452							-0.26788	-0.03174	1
		1313.5	0.01918	-0.00676							-0.26814	-0.03073	1
		1313	-0.00967	0.00197							-0.2684	-0.02971	1
		1312.5	-0.03628	-0.0121							-0.26865	-0.02869	1
		1312	-0.05291	-0.02228							-0.26889	-0.02767	1
		1311.5	-0.05391	-0.02166							-0.26912	-0.02664	1
		1311	-0.04464	-0.0166							-0.26934	-0.02562	1
		1310.5	-0.04298	-0.01195							-0.26954	-0.0246	1
		1310	-0.04714	-0.01377							-0.26974	-0.02357	1
		1309.5	-0.04491	-0.0097							-0.26992	-0.02255	1
		1309	-0.03269	-0.000632682							-0.2701	-0.02152	1
		1308.5	-0.02085	0.00216							-0.27026	-0.0205	1
		1308	-0.01512	-0.00188							-0.27042	-0.01947	1
		1307.5	-0.01674	-0.00465							-0.27056	-0.01844	1
		1307	-0.02496	-0.00695							-0.2707	-0.01742	1
		1306.5	-0.02214	-0.01172							-0.27082	-0.01639	1
		1306	-0.00731	-0.00954							-0.27093	-0.01536	1
		1305.5	0.000943828	-0.00174							-0.27103	-0.01433	1
		1305	0.00663	0.00673							-0.27112	-0.0133	1
		1304.5	0.00826	0.0132							-0.2712	-0.01227	1
		1304	-0.00697	0.00441							-0.27128	-0.01124	1
		1303.5	-0.01282	0.00395							-0.27133	-0.01021	1
		1303	0.00123	0.01213							-0.27138	-0.00918	1
		1302.5	0.00748	0.0019							-0.27142	-0.00815	1
		1302	0.00132	-0.00139							-0.27145	-0.00712	1
		1301.5	-0.01258	-0.00249							-0.27147	-0.00609	1
		1301	-0.021	-0.01103							-0.27148	-0.00506	1
		1300.5	-0.01507	-0.000845065							-0.27147	-0.00403	1
		1300	-0.00209	0.01054							--	--	--
		1299.5	0.01161	0.00613							-0.19599	0.02765	2
		1299	0.01263	0.00197							-0.19586	0.02877	2
		1298.5	9.02152e-05	-0.00168							-0.19572	0.02988	2
		1298	-0.0059	-0.00122							-0.19558	0.03099	2
		1297.5	0.000634901	0.000335286							-0.19543	0.0321	2
		1297	0.00506	-0.003							-0.19527	0.03321	2
		1296.5	0.0048	0.00274							-0.1951	0.03432	2
		1296	0.00635	0.00877							-0.19492	0.03543	2
		1295.5	-0.000971212	0.0087							-0.19474	0.03654	2
		1295	-0.00803	0.000226879							-0.19455	0.03765	2
		1294.5	0.00108	-0.00635							-0.19435	0.03875	2
		1294	0.000460659	0.0026							-0.19414	0.03985	2
		1293.5	-0.009	0.00555							-0.19392	0.04096	2
		1293	-0.01193	0.00254							-0.1937	0.04206	2
		1292.5	-0.00512	0.00279							-0.19347	0.04316	2
		1292	0.00564	-0.0068							-0.19323	0.04425	2
		1291.5	0.0024	-0.01085							-0.19298	0.04535	2
		1291	-0.00549	-0.000700905							-0.19273	0.04644	2
		1290.5	-0.01108	5.90981e-05							-0.19247	0.04754	2
		1290	-0.01025	-0.00108							-0.1922	0.04863	2
		1289.5	-0.00215	-0.00174							-0.19192	0.04972	2
		1289	0.000855958	-0.00657							-0.19163	0.05081	2
		1288.5	0.00259	0.000748551							-0.19134	0.05189	2
		1288	-0.000823916	0.00972							-0.19104	0.05298	2
		1287.5	-0.00619	0.0057							-0.19073	0.05406	2
		1287	-0.00716	-0.00492							-0.19041	0.05514	2
		1286.5	-0.01222	-0.01434							-0.19009	0.05622	2
		1286	-0.01303	-0.01263							-0.18976	0.05729	2
		1285.5	-0.01324	-0.00346							-0.18942	0.05837	2
		1285	-0.01596	-0.000361404							-0.18907	0.05944	2
		1284.5	-0.00908	-0.00257							-0.18872	0.06051	2
		1284	-0.00497	-0.00805							-0.18835	0.06158	2
		1283.5	-0.00828	-0.01476							-0.18798	0.06264	2
		1283	-0.00431	-0.0072							-0.18761	0.06371	2
		1282.5	-0.000229912	-0.00309							-0.18722	0.06477	2
		1282	-0.00229	-0.00687							-0.18683	0.06583	2
		1281.5	-0.01239	-0.000676903							-0.18643	0.06688	2
		1281	-0.01638	0.00751							-0.18602	0.06794	2
		1280.5	0.00219	0.00531							-0.18561	0.06899	2
		1280	0.01536	-0.00901							-0.18518	0.07004	2
		1279.5	0.00199	-0.01167							-0.18475	0.07108	2
		1279	-0.01341	-0.00605							-0.18431	0.07213	2
		1278.5	-0.00701	-0.00466							-0.18387	0.07317	2
		1278	0.00261	0.000700302							-0.18342	0.07421	2
		1277.5	0.00163	0.00243							-0.18296	0.07524	2
		1277	-0.000302035	-0.00553							-0.18249	0.07628	2
		1276.5	0.00177	-0.0107							-0.18201	0.07731	2
		1276	0.00621	0.00154							-0.18153	0.07833	2
		1275.5	0.00438	0.01725							-0.18104	0.07936	2
		1275	-0.00105	0.01522							-0.18054	0.08038	2
		1274.5	-0.00258	0.00288							-0.18004	0.0814	2
		1274	0.00733	-0.00695							-0.17953	0.08241	2
		1273.5	0.01275	-0.00484							-0.17901	0.08343	2
		1273	0.00286	0.00914							-0.17848	0.08443	2
		1272.5	-0.00133	0.02182							-0.17795	0.08544	2
		1272	-0.00116	0.01325							-0.17741	0.08644	2
		1271.5	0.00283	-0.0075							-0.17686	0.08744	2
		1271	0.00898	-0.01277							-0.17631	0.08844	2
		1270.5	0.00621	-0.00876							-0.17574	0.08943	2
		1270	0.00328	-0.00318							-0.17518	0.09042	2
		1269.5	0.000965338	0.000200991							-0.1746	0.09141	2
		1269	-0.0046	0.00784							-0.17402	0.09239	2
		1268.5	-0.000988767	0.01648							-0.17343	0.09337	2
		1268	0.00606	0.01447							-0.17283	0.09435	2
		1267.5	0.00971	0.00669							-0.17222	0.09532	2
		1267	0.00693	-0.00497							-0.17161	0.09629	2
		1266.5	-0.00344	-0.01248							-0.17099	0.09726	2
		1266	-0.00585	-0.00962							-0.17037	0.09822	2
		1265.5	-0.00257	-0.00126							-0.16974	0.09918	2
		1265	-0.00304	0.00141							-0.1691	0.10013	2
		1264.5	-0.00169	0.00798							-0.16845	0.10108	2
		1264	0.00749	0.02306							-0.1678	0.10203	2
		1263.5	0.01236	0.02067							-0.16714	0.10297	2
		1263	0.00423	-0.00604							-0.16647	0.10391	2
		1262.5	-0.00369	-0.01165							-0.1658	0.10485	2
		1262	-0.00327	0.0036							-0.16512	0.10578	2
		1261.5	0.00246	0.0044							-0.16443	0.1067	2
		1261	0.00487	0.00789							-0.16374	0.10763	2
		1260.5	0.00583	0.01144							-0.16304	0.10855	2
		1260	0.00607	5.41141e-05							-0.16233	0.10946	2
		1259.5	0.0031	-0.01672							-0.16162	0.11037	2
		1259	-0.00168	-0.01598							-0.1609	0.11128	2
		1258.5	-0.00698	-0.00121							-0.16018	0.11218	2
		1258	-0.00352	0.00636							-0.15944	0.11308	2
		1257.5	0.00029433	0.01766							-0.1587	0.11398	2
		1257	-0.00188	0.01676							-0.15796	0.11487	2
		1256.5	-0.000851624	-0.00616							-0.15721	0.11575	2
		1256	0.0075	-0.01247							-0.15645	0.11663	2
		1255.5	0.01537	-0.00613							-0.15568	0.11751	2
		1255	0.00769	-0.00943							-0.15491	0.11838	2
		1254.5	-0.00467	-0.00643							-0.15414	0.11925	2
		1254	-0.0033	0.00142							-0.15335	0.12011	2
		1253.5	-0.00551	0.00588							-0.15256	0.12097	2
		1253	-0.01027	0.00477							-0.15177	0.12183	2
		1252.5	-0.00754	0.00152							-0.15097	0.12268	2
		1252	-0.00734	0.000793436							-0.15016	0.12352	2
		1251.5	-0.00997	-0.00282							-0.14934	0.12436	2
		1251	-0.00808	-0.00168							-0.14852	0.1252	2
		1250.5	0.0053	-0.00438							-0.1477	0.12603	2
		1250	0.00695	-0.00926							-0.14686	0.12686	2
		1249.5	-0.00273	-0.00124							-0.14603	0.12768	2
		1249	-0.00169	0.00911							-0.14518	0.12849	2
		1248.5	0.000907976	0.01146							-0.14433	0.12931	2
		1248	0.000697562	-0.00177							-0.14347	0.13011	2
		1247.5	-0.00268	-0.02278							-0.14261	0.13091	2
		1247	-0.0113	-0.01978							-0.14174	0.13171	2
		1246.5	-0.01179	-0.00241							-0.14087	0.1325	2
		1246	-0.00519	0.00614							-0.13999	0.13329	2
		1245.5	-0.00435	0.01701							-0.13911	0.13407	2
		1245	-0.00127	0.02495							-0.13822	0.13485	2
		1244.5	0.00164	0.01003							-0.13732	0.13562	2
		1244	-0.00376	-0.00949							-0.13642	0.13639	2
		1243.5	-0.0087	-0.01493							-0.13551	0.13715	2
		1243	-0.008	-0.01393							-0.1346	0.1379	2
		1242.5	0.000277515	-0.00426							-0.13368	0.13865	2
		1242	0.00604	0.00753							-0.13276	0.1394	2
		1241.5	-0.00469	0.00519							-0.13183	0.14014	2
		1241	-0.01857	-0.00376							-0.13089	0.14087	2
		1240.5	-0.01685	0.0036							-0.12995	0.1416	2
		1240	-0.00111	0.01391							-0.12901	0.14233	2
		1239.5	0.00664	-0.000326205							-0.12806	0.14305	2
		1239	0.00365	-0.01207							-0.1271	0.14376	2
		1238.5	0.00203	-0.00589							-0.12614	0.14447	2
		1238	-0.00213	0.00235							-0.12517	0.14517	2
		1237.5	-0.00302	0.01277							-0.1242	0.14587	2
		1237	-0.0069	0.00883							-0.12322	0.14656	2
		1236.5	-0.00806	0.01039							-0.12224	0.14724	2
		1236	0.0012	0.02032							-0.12126	0.14792	2
		1235.5	0.000993613	0.00879							-0.12027	0.1486	2
		1235	0.00139	-0.00894							-0.11927	0.14926	2
		1234.5	0.00751	-0.02215							-0.11827	0.14993	2
		1234	0.00949	-0.01619							-0.11726	0.15058	2
		1233.5	0.00618	-0.00531							-0.11625	0.15124	2
		1233	-0.00284	-0.01177							-0.11524	0.15188	2
		1232.5	-0.00863	-0.01457							-0.11422	0.15252	2
		1232	-0.00111	-0.00155							-0.11319	0.15316	2
		1231.5	0.00785	0.01424							-0.11216	0.15378	2
		1231	0.00187	0.00141							-0.11113	0.15441	2
		1230.5	-0.00477	-0.01942							-0.11009	0.15502	2
		1230	0.00136	-0.01556							-0.10904	0.15563	2
		1229.5	0.00969	-0.01223							-0.108	0.15624	2
		1229	0.00829	-0.00943							-0.10694	0.15684	2
		1228.5	0.00291	0.00568							-0.10589	0.15743	2
		1228	0.00974	0.01646							-0.10483	0.15801	2
		1227.5	0.01276	0.00661							-0.10376	0.1586	2
		1227	0.00439	-0.01287							-0.10269	0.15917	2
		1226.5	0.00423	-0.01914							-0.10162	0.15974	2
		1226	0.00493	-0.000933511							-0.10054	0.1603	2
		1225.5	-0.000149738	0.0144							-0.09946	0.16086	2
		1225	-0.00379	-0.003							-0.09837	0.16141	2
		1224.5	0.00215	-0.0158							-0.09728	0.16195	2
		1224	0.01006	-0.0027							-0.09619	0.16249	2
		1223.5	0.00841	0.0121							-0.09509	0.16302	2
		1223	0.0027	0.0178							-0.09399	0.16354	2
		1222.5	-0.00771	0.02006							-0.09288	0.16406	2
		1222	-0.01836	0.02193							-0.09177	0.16458	2
		1221.5	-0.01957	0.03317							-0.09066	0.16508	2
		1221	-0.02539	0.04465							-0.08954	0.16558	2
		1220.5	-0.03312	0.02804							-0.08842	0.16608	2
		1220	-0.02301	0.01307							-0.0873	0.16656	2
		1219.5	0.00175	0.01443							-0.08617	0.16704	2
		1219	0.02522	0.00346							-0.08503	0.16752	2
		1218.5	0.03428	-0.02113							-0.0839	0.16799	2
		1218	0.03424	-0.05117							-0.08276	0.16845	2
		1217.5	0.03749	-0.06902							-0.08162	0.1689	2
		1217	0.03658	-0.05584							-0.08047	0.16935	2
		1216.5	0.02542	-0.02124							-0.07932	0.16979	2
		1216	0.01279	0.00902							-0.07817	0.17023	2
		1215.5	0.00584	0.01964							-0.07701	0.17066	2
		1215	-0.00197	0.0106							-0.07586	0.17108	2
		1214.5	-0.01221	0.00106							-0.07469	0.1715	2
		1214	-0.01057	0.00938							-0.07353	0.17191	2
		1213.5	-0.01186	0.02753							-0.07236	0.17231	2
		1213	-0.00744	0.02695							-0.07119	0.1727	2
		1212.5	0.00692	0.00829							-0.07001	0.17309	2
		1212	0.00536	-0.009							-0.06884	0.17348	2
		1211.5	-0.00326	-0.0168							-0.06766	0.17385	2
		1211	-0.00419	0.0012							-0.06647	0.17422	2
		1210.5	0.00464	0.02851							-0.06529	0.17459	2
		1210	0.00524	0.02898							-0.0641	0.17494	2
		1209.5	-0.000371136	0.00439							-0.06291	0.17529	2
		1209	-0.00331	-0.0025							-0.06172	0.17564	2
		1208.5	-0.00767	0.000523641							-0.06052	0.17597	2
		1208	-0.0049	-0.00655							-0.05932	0.1763	2
		1207.5	0.00106	-0.01004							-0.05812	0.17662	2
		1207	-0.00241	-0.01051							-0.05691	0.17694	2
		1206.5	-0.00275	-0.0036							-0.05571	0.17725	2
		1206	0.00261	0.00669							-0.0545	0.17755	2
		1205.5	0.00516	0.01129							-0.05329	0.17785	2
		1205	0.0121	0.0083							-0.05208	0.17813	2
		1204.5	0.00273	-0.00619							-0.05086	0.17842	2
		1204	-0.01259	-0.0279							-0.04964	0.17869	2
		1203.5	-0.01354	-0.02773							-0.04842	0.17896	2
		1203	-0.01385	-0.01498							-0.0472	0.17922	2
		1202.5	-0.00371	-0.00502							-0.04598	0.17947	2
		1202	0.01074	0.00395							-0.04475	0.17972	2
		1201.5	0.00526	0.00268							-0.04352	0.17996	2
		1201	-0.01264	0.00359							-0.04229	0.1802	2
		1200.5	-0.0219	0.00333							-0.04106	0.18042	2
		1200	-0.01262	-0.00512							-0.03983	0.18064	2
		1199.5	0.000254205	-0.02215							-0.03859	0.18085	2
		1199	0.00183	-0.02984							-0.03736	0.18106	2
		1198.5	-0.00254	-0.01105							-0.03612	0.18126	2
		1198	-0.00791	0.01323							-0.03488	0.18145	2
		1197.5	-0.0068	0.03307							-0.03364	0.18164	2
		1197	-0.00375	0.02747							-0.03239	0.18181	2
		1196.5	-0.00478	-0.00676							-0.03115	0.18199	2
		1196	-0.00876	-0.02655							-0.0299	0.18215	2
		1195.5	-0.01191	-0.02383							-0.02865	0.18231	2
		1195	-0.00831	-0.01681							-0.02741	0.18246	2
		1194.5	0.00131	-0.00263							-0.02616	0.1826	2
		1194	0.00934	0.00251							-0.02491	0.18274	2
		1193.5	0.0085	-0.00228							-0.02365	0.18286	2
		1193	0.00358	0.01295							-0.0224	0.18299	2
		1192.5	-0.00546	0.02454							-0.02115	0.1831	2
		1192	-0.01394	0.01242							-0.01989	0.18321	2
		1191.5	-0.01524	-0.00121							-0.01863	0.18331	2
		1191	-0.00835	-0.00949							-0.01738	0.1834	2
		1190.5	0.00266	-0.01636							-0.01612	0.18349	2
		1190	0.00895	-0.01141							-0.01486	0.18357	2
		1189.5	0.0077	0.00205							-0.0136	0.18364	2
		1189	-0.00624	0.00621							-0.01234	0.18371	2
		1188.5	-0.01034	0.00334							-0.01108	0.18377	2
		1188	-0.00381	-0.00201							-0.00982	0.18382	2
		1187.5	-0.0092	-0.01201							-0.00856	0.18386	2
		1187	-0.00652	-0.0234							-0.00729	0.1839	2
		1186.5	0.00805	-0.01116							-0.00603	0.18393	2
		1186	0.01336	0.02538							-0.00477	0.18395	2
		1185.5	0.01209	0.03809							-0.0035	0.18397	2
		1185	0.01082	0.01299							-0.00224	0.18398	2
		1184.5	-0.00241	-0.00794							-0.00097396	0.18398	2
		1184	-0.0183	-0.01067							0.000290589	0.18397	2
		1183.5	-0.01193	-0.0135							0.00156	0.18396	2
		1183	0.00187	-0.00172							0.00282	0.18394	2
		1182.5	0.00152	0.01464							0.00408	0.18392	2
		1182	-0.0009839	0.0134							0.00535	0.18388	2
		1181.5	-0.00306	0.00971							0.00661	0.18384	2
		1181	-0.00613	0.00478							0.00788	0.1838	2
		1180.5	-0.00213	-0.01648							0.00914	0.18374	2
		1180	0.00566	-0.03251							0.01041	0.18368	2
		1179.5	0.0084	-0.01066							0.01167	0.18361	2
		1179	0.00998	0.01458							0.01294	0.18354	2
		1178.5	0.00867	0.01229							0.0142	0.18345	2
		1178	0.00523	0.000774778							0.01546	0.18336	2
		1177.5	0.00207	-0.01264							0.01673	0.18327	2
		1177	-0.00298	-0.01414							0.01799	0.18316	2
		1176.5	-0.000190566	-9.51212e-06							0.01925	0.18305	2
		1176	0.00378	0.01106							0.02051	0.18293	2
		1175.5	0.00709	0.01583							0.02177	0.18281	2
		1175	0.00575	0.01178							0.02303	0.18268	2
		1174.5	-0.00428	-0.00777							0.02429	0.18254	2
		1174	-0.0138	-0.02307							0.02555	0.18239	2
		1173.5	-0.01724	-0.00754							0.0268	0.18224	2
		1173	-0.01113	0.00559							0.02806	0.18208	2
		1172.5	0.00228	0.00753							0.02932	0.18191	2
		1172	0.01279	0.01489							0.03057	0.18174	2
		1171.5	0.00719	0.00428							0.03182	0.18156	2
		1171	-0.00467	-0.00019133							0.03308	0.18137	2
		1170.5	-0.000101444	0.01428							0.03433	0.18117	2
		1170	0.02107	0.01504							0.03558	0.18097	2
		1169.5	0.03591	0.00462							0.03683	0.18076	2
		1169	0.02585	-0.00759							0.03807	0.18055	2
		1168.5	-0.00253	-0.00751							0.03932	0.18032	2
		1168	-0.01963	0.00804							0.04056	0.18009	2
		1167.5	-0.01846	0.00797							0.04181	0.17986	2
		1167	-0.00494	0.00207							0.04305	0.17961	2
		1166.5	0.02248	0.00118							0.04429	0.17936	2
		1166	0.03335	0.000404013							0.04553	0.17911	2
		1165.5	0.02547	0.01011							0.04676	0.17884	2
		1165	0.01417	0.00974							0.048	0.17857	2
		1164.5	-0.00434	0.00132							0.04923	0.17829	2
		1164	-0.01209	-0.00327							0.05047	0.17801	2
		1163.5	-0.00892	-0.00482							0.0517	0.17772	2
		1163	-0.00437	0.00146							0.05292	0.17742	2
		1162.5	0.00381	-0.0052							0.05415	0.17711	2
		1162	0.01024	-0.01831							0.05537	0.1768	2
		1161.5	0.00962	-0.01427							0.0566	0.17648	2
		1161	-0.000845543	-0.00339							0.05782	0.17616	2
		1160.5	-0.01093	0.01277							0.05903	0.17582	2
		1160	-0.01344	0.02604							0.06025	0.17548	2
		1159.5	-0.00894	0.01394							0.06146	0.17514	2
		1159	-0.00246	-0.00506							0.06267	0.17479	2
		1158.5	0.000591924	-0.02461							0.06388	0.17443	2
		1158	0.000884023	-0.03485							0.06509	0.17406	2
		1157.5	-0.000141261	-0.01023							0.06629	0.17369	2
		1157	0.00217	0.01536							0.0675	0.17331	2
		1156.5	0.0043	0.01461							0.06869	0.17292	2
		1156	0.00729	0.00897							0.06989	0.17253	2
		1155.5	0.00951	0.01027							0.07109	0.17213	2
		1155	0.00134	0.00777							0.07228	0.17173	2
		1154.5	-0.01104	-0.00412							0.07347	0.17131	2
		1154	-0.02091	-0.01922							0.07465	0.17089	2
		1153.5	-0.02371	-0.02577							0.07583	0.17047	2
		1153	-0.01308	-0.01461							0.07701	0.17004	2
		1152.5	-0.00685	0.000450506							0.07819	0.1696	2
		1152	-0.00369	0.00328							0.07937	0.16915	2
		1151.5	0.00886	0.00329							0.08054	0.1687	2
		1151	0.01236	-0.00576							0.08171	0.16824	2
		1150.5	0.00191	-0.01898							0.08287	0.16778	2
		1150	-0.00968	-0.01617							0.08403	0.16731	2
		1149.5	-0.0096	-0.0024							0.08519	0.16683	2
		1149	-0.00592	0.01333							0.08635	0.16635	2
		1148.5	-0.00291	0.01414							0.0875	0.16586	2
		1148	0.00311	0.01156							0.08865	0.16536	2
		1147.5	0.00483	0.02156							0.0898	0.16486	2
		1147	-0.00502	0.01805							0.09094	0.16435	2
		1146.5	-0.02147	0.00348							0.09208	0.16383	2
		1146	-0.01796	-0.00553							0.09322	0.16331	2
		1145.5	-0.00166	-0.01867							0.09435	0.16278	2
		1145	0.00542	-0.02003							0.09548	0.16225	2
		1144.5	0.01275	0.000822735							0.0966	0.16171	2
		1144	0.02002	0.00662							0.09772	0.16116	2
		1143.5	0.0118	-0.00152							0.09884	0.16061	2
		1143	0.00356	0.01319							0.09995	0.16005	2
		1142.5	0.00689	0.02012							0.10106	0.15949	2
		1142	0.00609	0.01222							0.10217	0.15892	2
		1141.5	0.00245	0.01443							0.10327	0.15834	2
		1141	0.00374	0.01116							0.10437	0.15776	2
		1140.5	-0.00288	0.01248							0.10547	0.15717	2
		1140	-0.0117	0.00321							0.10656	0.15657	2
		1139.5	0.0019	-0.01373							0.10764	0.15597	2
		1139	0.02431	-0.01016							0.10873	0.15536	2
		1138.5	0.02726	-0.00621							0.1098	0.15475	2
		1138	0.01086	0.00511							0.11088	0.15413	2
		1137.5	0.00061118	0.02257							0.11195	0.15351	2
		1137	0.00174	0.02449							0.11301	0.15288	2
		1136.5	0.00458	0.01466							0.11408	0.15224	2
		1136	0.01052	-0.00342							0.11513	0.1516	2
		1135.5	0.01527	-0.00613							0.11618	0.15095	2
		1135	0.01013	0.00551							0.11723	0.1503	2
		1134.5	-0.000356417	-0.00977							0.11828	0.14964	2
		1134	-0.00684	-0.02801							0.11932	0.14897	2
		1133.5	-0.01392	-0.01905							0.12035	0.1483	2
		1133	-0.01041	-0.00116							0.12138	0.14762	2
		1132.5	0.00762	0.01307							0.12241	0.14694	2
		1132	0.02244	0.01693							0.12343	0.14625	2
		1131.5	0.02683	0.00276							0.12444	0.14556	2
		1131	0.00996	-0.01153							0.12545	0.14486	2
		1130.5	-0.02034	0.000200493							0.12646	0.14415	2
		1130	-0.03247	0.01382							0.12746	0.14344	2
		1129.5	-0.02818	0.01153							0.12846	0.14273	2
		1129	-0.01891	-0.00314							0.12945	0.14201	2
		1128.5	-0.000783393	-0.02011							0.13044	0.14128	2
		1128	0.01054	-0.02367							0.13142	0.14055	2
		1127.5	0.01425	-0.01951							0.1324	0.13981	2
		1127	0.01478	-0.0048							0.13337	0.13907	2
		1126.5	0.01196	0.01997							0.13433	0.13832	2
		1126	0.00674	0.02424							0.1353	0.13757	2
		1125.5	-0.00896	0.00707							0.13625	0.13681	2
		1125	-0.01993	-0.00939							0.1372	0.13605	2
		1124.5	-0.01368	-0.01269							0.13815	0.13528	2
		1124	0.00694	0.00777							0.13909	0.13451	2
		1123.5	0.02262	0.02318							0.14002	0.13373	2
		1123	0.0168	0.01946							0.14095	0.13294	2
		1122.5	0.00514	0.01201							0.14188	0.13215	2
		1122	-0.00364	-9.76916e-06							0.1428	0.13136	2
		1121.5	-0.01198	-0.01379							0.14371	0.13056	2
		1121	-0.00829	-0.02005							0.14462	0.12976	2
		1120.5	-0.0038	-0.0157							0.14552	0.12895	2
		1120	-0.00442	-0.01749							0.14642	0.12813	2
		1119.5	0.00889	-0.01207							0.14731	0.12731	2
		1119	0.01606	0.01623							0.14819	0.12649	2
		1118.5	0.00591	0.02921							0.14907	0.12566	2
		1118	-0.00575	0.0182							0.14995	0.12483	2
		1117.5	-0.0126	0.00182							0.15082	0.12399	2
		1117	-0.01542	-0.00386							0.15168	0.12315	2
		1116.5	-0.01326	-0.00247							0.15253	0.1223	2
		1116	-0.00556	-0.000826634							0.15339	0.12145	2
		1115.5	-0.00178	-0.00325							0.15423	0.12059	2
		1115	-0.00161	-0.01609							0.15507	0.11973	2
		1114.5	-0.00155	-0.01872							0.1559	0.11887	2
		1114	-2.3364e-05	-0.01044							0.15673	0.118	2
		1113.5	0.00204	-0.00238							0.15755	0.11712	2
		1113	0.00117	0.00323							0.15836	0.11624	2
		1112.5	-0.00197	0.01164							0.15917	0.11536	2
		1112	-0.00497	0.01886							0.15998	0.11447	2
		1111.5	-0.00739	0.01782							0.16077	0.11358	2
		1111	-0.01327	0.007							0.16156	0.11269	2
		1110.5	-0.01272	-0.01139							0.16235	0.11179	2
		1110	-0.00608	-0.01519							0.16312	0.11088	2
		1109.5	-0.01353	-0.01527							0.1639	0.10997	2
		1109	-0.02224	-0.01578							0.16466	0.10906	2
		1108.5	-0.01826	-0.00441							0.16542	0.10814	2
		1108	-0.00227	-0.0012							0.16617	0.10722	2
		1107.5	0.02001	-0.00118							0.16692	0.1063	2
		1107	0.02955	-0.00134							0.16766	0.10537	2
		1106.5	0.02026	-0.00281							0.16839	0.10443	2
		1106	-0.00836	-0.000318035							0.16912	0.1035	2
		1105.5	-0.0371	0.00211							0.16984	0.10256	2
		1105	-0.04273	0.00248							0.17055	0.10161	2
		1104.5	-0.02644	0.000553868							0.17126	0.10066	2
		1104	-0.00246	0.00548							0.17196	0.09971	2
		1103.5	0.01646	0.01002							0.17265	0.09875	2
		1103	0.02029	-0.00438							0.17334	0.09779	2
		1102.5	0.00961	-0.02215							0.17402	0.09683	2
		1102	0.0027	-0.01989							0.17469	0.09586	2
		1101.5	0.00523	-0.00863							0.17536	0.09489	2
		1101	0.000235631	0.00726							0.17602	0.09392	2
		1100.5	-0.0157	0.01604							0.17667	0.09294	2
		1100	-0.02386	-0.00437							0.17732	0.09196	2
		1099.5	-0.02002	-0.02136							0.17796	0.09097	2
		1099	-0.00173	-0.00419							0.17859	0.08999	2
		1098.5	0.01415	0.00342							0.17922	0.08899	2
		1098	0.00996	-0.0002602							0.17984	0.088	2
		1097.5	0.00299	0.01185							0.18045	0.087	2
		1097	-0.00721	0.01367							0.18105	0.086	2
		1096.5	-0.00863	0.00686							0.18165	0.085	2
		1096	0.01083	0.00413							0.18224	0.08399	2
		1095.5	0.01889	-0.00833							0.18283	0.08298	2
		1095	0.01134	-0.01727							0.1834	0.08196	2
		1094.5	0.00291	0.00125							0.18397	0.08095	2
		1094	-0.01088	0.02229							0.18454	0.07993	2
		1093.5	-0.02056	0.02122							0.18509	0.07891	2
		1093	-0.02022	0.00294							0.18564	0.07788	2
		1092.5	-0.00186	-0.02086							0.18618	0.07685	2
		1092	0.01998	-0.03755							0.18671	0.07582	2
		1091.5	0.02191	-0.03303							0.18724	0.07479	2
		1091	0.01745	-0.00687							0.18776	0.07375	2
		1090.5	0.00275	0.01365							0.18827	0.07271	2
		1090	-0.01265	0.01526							0.18878	0.07167	2
		1089.5	-0.01986	0.000690863							0.18928	0.07062	2
		1089	-0.01253	-0.01642							0.18977	0.06957	2
		1088.5	0.01728	-0.02139							0.19025	0.06852	2
		1088	0.0386	-0.00917							0.19072	0.06747	2
		1087.5	0.02575	0.02148							0.19119	0.06642	2
		1087	-0.01358	0.04451							0.19165	0.06536	2
		1086.5	-0.04057	0.04282							0.19211	0.0643	2
		1086	-0.02878	0.02459							0.19255	0.06324	2
		1085.5	0.00801	-0.00315							0.19299	0.06217	2
		1085	0.04022	-0.01344							0.19342	0.06111	2
		1084.5	0.04875	0.00424							0.19385	0.06004	2
		1084	0.03044	0.0103							0.19426	0.05897	2
		1083.5	0.01296	-0.01406							0.19467	0.05789	2
		1083	0.00321	-0.03872							0.19507	0.05682	2
		1082.5	-0.00896	-0.03866							0.19546	0.05574	2
		1082	-0.000680493	-0.01358							0.19585	0.05466	2
		1081.5	0.01722	0.03094							0.19623	0.05358	2
		1081	0.02173	0.05652							0.1966	0.0525	2
		1080.5	0.01052	0.03914							0.19696	0.05141	2
		1080	0.000126984	0.01032							0.19732	0.05033	2
		1079.5	-0.00501	-0.01553							0.19767	0.04924	2
		1079	-0.01487	-0.01807							0.19801	0.04815	2
		1078.5	-0.00478	7.85016e-05							0.19834	0.04705	2
		1078	0.017	0.00446							0.19866	0.04596	2
		1077.5	0.02641	0.000228688							0.19898	0.04487	2
		1077	0.02523	-0.00196							0.19929	0.04377	2
		1076.5	0.01291	0.01182							0.19959	0.04267	2
		1076	0.00466	0.03699							0.19989	0.04157	2
		1075.5	-0.000211781	0.03683							0.20017	0.04047	2
		1075	-0.01171	-0.00167							0.20045	0.03937	2
		1074.5	-0.00919	-0.03391							0.20072	0.03826	2
		1074	0.00338	-0.02948							0.20098	0.03716	2
		1073.5	0.01325	-0.00872							0.20124	0.03605	2
		1073	0.024	0.01705							0.20149	0.03494	2
		1072.5	0.02256	0.02841							0.20173	0.03383	2
		1072	0.0138	0.02829							0.20196	0.03272	2
		1071.5	0.00423	0.0198							0.20218	0.03161	2
		1071	-0.01924	0.000119682							0.2024	0.0305	2
		1070.5	-0.03343	-0.01079							0.20261	0.02939	2
		1070	-0.02724	-0.02673							0.20281	0.02827	2
		1069.5	-0.01449	-0.03747							0.203	0.02716	2
		1069	0.00348	-0.02065							0.20318	0.02604	2
		1068.5	0.00587	-0.000537653							0.20336	0.02492	2
		1068	-0.00147	0.00443							0.20353	0.02381	2
		1067.5	-0.00382	0.0019							0.20369	0.02269	2
		1067	-0.01099	0.00239							0.20384	0.02157	2
		1066.5	-0.01011	0.00416							0.20399	0.02045	2
		1066	-0.01023	0.00626							0.20413	0.01933	2
		1065.5	-0.00859	0.01865							0.20425	0.01821	2
		1065	0.01069	0.02039							0.20438	0.01709	2
		1064.5	0.01394	-0.00253							0.20449	0.01597	2
		1064	0.000840583	-0.025							0.2046	0.01484	2
		1063.5	-0.01055	-0.03856							0.20469	0.01372	2
		1063	-0.01539	-0.04079							0.20478	0.0126	2
		1062.5	-0.01032	-0.01574							0.20486	0.01147	2
		1062	-0.00333	0.02247							0.20494	0.01035	2
		1061.5	0.00551	0.03607							0.205	0.00923	2
		1061	0.000797158	0.02143							0.20506	0.0081	2
		1060.5	-0.01633	-0.01337							0.20511	0.00698	2
		1060	-0.02537	-0.04032							0.20515	0.00586	2
		1059.5	-0.02371	-0.03842							0.20519	0.00473	2
		1059	-0.01151	-0.01819							0.20521	0.00361	2
		1058.5	0.00662	0.00585							0.20523	0.00248	2
		1058	0.02293	0.01534							0.20524	0.00136	2
		1057.5	0.02846	0.00981							0.20525	0.000236026	2
		1057	0.01766	-0.00117							0.20524	-0.000887473	2
		1056.5	0.00165	-0.00969							0.20523	-0.00201	2
		1056	-0.003	-0.01013							0.2052	-0.00313	2
		1055.5	-0.00263	0.000291016							0.20518	-0.00426	2
		1055	0.000166447	0.00653							0.20514	-0.00538	2
		1054.5	0.00675	0.00914							0.20509	-0.0065	2
		1054	0.00705	0.02233							0.20504	-0.00762	2
		1053.5	0.00072673	0.014							0.20498	-0.00874	2
		1053	-0.00471	-0.013							0.20491	-0.00986	2
		1052.5	-0.00696	-0.01754							0.20483	-0.01098	2
		1052	-0.00676	-0.00204							0.20475	-0.0121	2
		1051.5	0.00355	0.01631							0.20465	-0.01322	2
		1051	0.013	0.01158							0.20455	-0.01434	2
		1050.5	0.0125	-0.00417							0.20444	-0.01545	2
		1050	0.00665	-0.00468							0.20433	-0.01657	2
		1049.5	0.00052165	0.00495							0.2042	-0.01769	2
		1049	0.00055422	0.000738762							0.20407	-0.0188	2
		1048.5	0.0046	-0.01909							0.20393	-0.01991	2
		1048	0.00314	-0.01411							0.20378	-0.02103	2
		1047.5	-0.00391	0.00127							0.20362	-0.02214	2
		1047	-0.00148	0.00613							0.20346	-0.02325	2
		1046.5	0.00307	0.00911							0.20329	-0.02436	2
		1046	0.00167	0.00629							0.20311	-0.02546	2
		1045.5	-0.00662	-0.00236							0.20292	-0.02657	2
		1045	-0.01663	0.00109							0.20272	-0.02768	2
		1044.5	-0.0172	0.01897							0.20252	-0.02878	2
		1044	-0.0065	0.01946							0.20231	-0.02988	2
		1043.5	0.01252	2.05002e-05							0.20209	-0.03098	2
		1043	0.02368	-0.0173							0.20186	-0.03208	2
		1042.5	0.0133	-0.01197							0.20163	-0.03318	2
		1042	-0.00907	0.00244							0.20138	-0.03428	2
		1041.5	-0.01975	6.45653e-06							0.20113	-0.03538	2
		1041	-0.01356	-0.00658							0.20087	-0.03647	2
		1040.5	-0.00946	-0.01721							0.20061	-0.03756	2
		1040	-0.01389	-0.0305							0.20033	-0.03865	2
		1039.5	-0.01692	-0.02013							0.20005	-0.03974	2
		1039	-0.01708	0.01076							0.19976	-0.04083	2
		1038.5	-0.00731	0.02152							0.19947	-0.04191	2
		1038	0.00127	0.01476							0.19916	-0.043	2
		1037.5	-0.000423456	0.01629							0.19885	-0.04408	2
		1037	-0.000305965	-0.00364							0.19853	-0.04516	2
		1036.5	-0.00682	-0.02958							0.1982	-0.04623	2
		1036	-0.01057	-0.02921							0.19787	-0.04731	2
		1035.5	-0.01008	-0.02154							0.19752	-0.04838	2
		1035	-0.01753	-0.0059							0.19717	-0.04945	2
		1034.5	-0.00933	0.00272							0.19681	-0.05052	2
		1034	0.00382	-0.00369							0.19645	-0.05159	2
		1033.5	0.00332	0.00543							0.19607	-0.05265	2
		1033	-0.00138	0.02227							0.19569	-0.05372	2
		1032.5	-0.01157	0.01226							0.1953	-0.05478	2
		1032	-0.0167	-0.00281							0.1949	-0.05583	2
		1031.5	-0.0074	-0.0018							0.1945	-0.05689	2
		1031	0.00683	-0.00339							0.19409	-0.05794	2
		1030.5	0.00843	-0.00427							0.19367	-0.05899	2
		1030	0.0065	0.00365							0.19324	-0.06004	2
		1029.5	0.00297	0.00744							0.19281	-0.06108	2
		1029	-0.01179	0.000858057							0.19237	-0.06213	2
		1028.5	-0.01645	-0.00356							0.19192	-0.06317	2
		1028	-0.00818	-0.0019							0.19146	-0.0642	2
		1027.5	0.00284	0.01182							0.191	-0.06524	2
		1027	0.01094	0.03045							0.19053	-0.06627	2
		1026.5	0.00642	0.0326							0.19005	-0.0673	2
		1026	-0.00398	0.01067							0.18956	-0.06832	2
		1025.5	-0.00659	-0.02548							0.18907	-0.06935	2
		1025	0.00244	-0.03701							0.18857	-0.07037	2
		1024.5	0.02145	-0.02276							0.18806	-0.07138	2
		1024	0.03452	-0.00353							0.18754	-0.0724	2
		1023.5	0.02936	0.01591							0.18702	-0.07341	2
		1023	0.012	0.01323							0.18649	-0.07442	2
		1022.5	-0.00731	-0.00706							0.18596	-0.07542	2
		1022	-0.01932	-0.02013							0.18541	-0.07642	2
		1021.5	-0.01557	-0.00457							0.18486	-0.07742	2
		1021	-0.006	0.02035							0.1843	-0.07842	2
		1020.5	-0.00202	0.02373							0.18374	-0.07941	2
		1020	0.00651	0.00633							0.18316	-0.0804	2
		1019.5	0.01577	-0.01668							0.18258	-0.08138	2
		1019	0.00935	-0.0183							0.182	-0.08236	2
		1018.5	-0.00672	0.000511987							0.1814	-0.08334	2
		1018	-0.01411	0.02972							0.1808	-0.08431	2
		1017.5	-0.01252	0.04314							0.18019	-0.08528	2
		1017	-0.00308	0.01934							0.17958	-0.08625	2
		1016.5	0.0123	-0.0231							0.17896	-0.08722	2
		1016	0.01229	-0.04419							0.17833	-0.08818	2
		1015.5	-0.000241981	-0.02146							0.17769	-0.08913	2
		1015	-0.00213	0.01664							0.17705	-0.09008	2
		1014.5	0.00472	0.02361							0.1764	-0.09103	2
		1014	0.01078	-0.00361							0.17575	-0.09198	2
		1013.5	0.01023	-0.02525							0.17508	-0.09292	2
		1013	0.00367	-0.02664							0.17441	-0.09386	2
		1012.5	0.00587	-0.00948							0.17374	-0.09479	2
		1012	0.01585	0.00755							0.17305	-0.09572	2
		1011.5	0.01271	0.00952							0.17236	-0.09665	2
		1011	-0.00612	0.01663							0.17167	-0.09757	2
		1010.5	-0.02071	0.0186							0.17096	-0.09848	2
		1010	-0.0181	0.01008							0.17025	-0.0994	2
		1009.5	-0.00906	0.01218							0.16954	-0.10031	2
		1009	0.00567	0.01099							0.16882	-0.10121	2
		1008.5	0.02394	0.00657							0.16809	-0.10211	2
		1008	0.03043	0.01497							0.16735	-0.10301	2
		1007.5	0.02283	0.01638							0.16661	-0.1039	2
		1007	0.00899	-0.001							0.16586	-0.10479	2
		1006.5	-0.00376	-0.013							0.1651	-0.10567	2
		1006	-0.01228	-0.01535							0.16434	-0.10655	2
		1005.5	-0.00862	-0.00512							0.16357	-0.10743	2
		1005	0.000590126	0.01532							0.1628	-0.1083	2
		1004.5	0.00148	0.00652							0.16202	-0.10916	2
		1004	-0.00358	-0.01837							0.16123	-0.11002	2
		1003.5	-0.00502	-0.02149							0.16044	-0.11088	2
		1003	-0.00709	-0.00577							0.15964	-0.11173	2
		1002.5	-0.01023	0.01152							0.15884	-0.11258	2
		1002	-0.00793	0.01655							0.15803	-0.11342	2
		1001.5	-0.00243	0.00485							0.15721	-0.11426	2
		1001	0.00838	-0.00536							0.15638	-0.11509	2
		1000.5	0.01368	-0.00263							0.15556	-0.11592	2
		1000	0.00322	-0.00513							0.15472	-0.11675	2
		999.5	-0.01116	-0.00302							0.15388	-0.11756	2
		999	-0.01495	0.00153							0.15303	-0.11838	2
		998.5	-0.00713	-0.00949							0.15218	-0.11919	2
		998	0.00218	-0.00361							0.15132	-0.11999	2
		997.5	0.00204	0.00919							0.15045	-0.12079	2
		997	-0.00622	-0.00437							0.14958	-0.12159	2
		996.5	-0.01247	-0.02553							0.14871	-0.12237	2
		996	-0.01639	-0.02858							0.14783	-0.12316	2
		995.5	-0.01516	-0.0063							0.14694	-0.12394	2
		995	-0.01078	0.02187							0.14604	-0.12471	2
		994.5	-0.00844	0.03369							0.14514	-0.12548	2
		994	-0.0028	0.0212							0.14424	-0.12625	2
		993.5	-0.000400574	-0.00968							0.14333	-0.127	2
		993	-5.89573e-05	-0.02707							0.14241	-0.12776	2
		992.5	0.00632	-0.01472							0.14149	-0.12851	2
		992	0.01404	-0.00734							0.14057	-0.12925	2
		991.5	0.01111	-0.00834							0.13963	-0.12999	2
		991	-0.00849	-0.00826							0.1387	-0.13072	2
		990.5	-0.02097	-0.01401							0.13775	-0.13144	2
		990	-0.01522	-0.01283							0.13681	-0.13217	2
		989.5	-0.00985	-0.0022							0.13585	-0.13288	2
		989	-0.00316	0.01583							0.13489	-0.13359	2
		988.5	-0.00241	0.02882							0.13393	-0.1343	2
		988	-0.00808	0.02466							0.13296	-0.135	2
		987.5	-0.000909423	0.008							0.13199	-0.13569	2
		987	0.00641	-0.01788							0.13101	-0.13638	2
		986.5	0.00943	-0.03478							0.13003	-0.13706	2
		986	0.0094	-0.01765							0.12904	-0.13774	2
		985.5	-0.000441152	0.00574							0.12804	-0.13841	2
		985	-0.0082	0.00296							0.12704	-0.13908	2
		984.5	-0.00569	-0.00188							0.12604	-0.13974	2
		984	0.00195	0.00356							0.12503	-0.14039	2
		983.5	0.00296	0.01945							0.12402	-0.14104	2
		983	0.00497	0.03107							0.123	-0.14168	2
		982.5	0.01276	0.01382							0.12198	-0.14232	2
		982	0.01217	-0.00397							0.12095	-0.14295	2
		981.5	0.01106	-0.01482							0.11992	-0.14357	2
		981	0.00629	-0.0226							0.11888	-0.14419	2
		980.5	-0.00293	-0.01158							0.11784	-0.14481	2
		980	-0.00454	0.003							0.1168	-0.14541	2
		979.5	0.000821819	0.01136							0.11575	-0.14602	2
		979	0.00835	0.00506							0.11469	-0.14661	2
		978.5	0.00646	-0.00469							0.11363	-0.1472	2
		978	-0.00105	0.00631							0.11257	-0.14778	2
		977.5	-0.00237	0.01402							0.1115	-0.14836	2
		977	-0.00277	0.0096							0.11043	-0.14893	2
		976.5	-0.00641	0.00787							0.10936	-0.1495	2
		976	-0.00714	-0.000912227							0.10828	-0.15006	2
		975.5	-0.00559	-0.01518							0.10719	-0.15061	2
		975	0.00147	-0.02403							0.1061	-0.15116	2
		974.5	0.00131	-0.02098							0.10501	-0.1517	2
		974	-0.01369	-0.00178							0.10391	-0.15223	2
		973.5	-0.01337	0.02359							0.10281	-0.15276	2
		973	-0.000207526	0.0292							0.10171	-0.15328	2
		972.5	0.01009	0.00988							0.1006	-0.1538	2
		972	0.01106	-0.01284							0.09949	-0.15431	2
		971.5	-0.00443	-0.01757							0.09837	-0.15481	2
		971	-0.01313	-0.00676							0.09726	-0.15531	2
		970.5	2.42332e-05	-0.00205							0.09613	-0.1558	2
		970	0.01096	-0.000306184							0.09501	-0.15628	2
		969.5	0.01053	-0.00298							0.09388	-0.15676	2
		969	0.01012	-0.01351							0.09274	-0.15723	2
		968.5	-0.00356	-0.01237							0.09161	-0.1577	2
		968	-0.02393	0.00542							0.09046	-0.15815	2
		967.5	-0.02703	0.02181							0.08932	-0.15861	2
		967	-0.01754	0.01223							0.08817	-0.15905	2
		966.5	-0.00468	-0.00801							0.08702	-0.15949	2
		966	0.01	-0.01602							0.08587	-0.15992	2
		965.5	0.01874	-0.01972							0.08471	-0.16035	2
		965	0.01859	-0.01374							0.08355	-0.16077	2
		964.5	0.01041	-0.01141							0.08239	-0.16118	2
		964	-0.0091	-0.00262							0.08122	-0.16159	2
		963.5	-0.02264	0.02494							0.08005	-0.16199	2
		963	-0.01928	0.03081							0.07888	-0.16238	2
		962.5	-0.00568	0.02027							0.0777	-0.16277	2
		962	0.00931	0.01172							0.07652	-0.16314	2
		961.5	0.01354	-0.00442							0.07534	-0.16352	2
		961	0.01123	-0.01658							0.07416	-0.16388	2
		960.5	0.00613	-0.01456							0.07297	-0.16424	2
		960	0.00394	-0.0182							0.07178	-0.1646	2
		959.5	0.00634	-0.01995							0.07059	-0.16494	2
		959	0.01125	0.00153							0.06939	-0.16528	2
		958.5	0.0159	0.02105							0.06819	-0.16561	2
		958	0.00734	0.02462							0.06699	-0.16594	2
		957.5	-0.00162	0.02133							0.06579	-0.16626	2
		957	-0.00528	0.00713							0.06459	-0.16657	2
		956.5	-0.00917	-0.00966							0.06338	-0.16688	2
		956	-0.00873	-0.02397							0.06217	-0.16718	2
		955.5	-0.00782	-0.02535							0.06096	-0.16747	2
		955	-0.00473	0.00193							0.05974	-0.16775	2
		954.5	0.00186	0.02422							0.05853	-0.16803	2
		954	0.00763	0.01484							0.05731	-0.1683	2
		953.5	0.01562	0.00211							0.05609	-0.16857	2
		953	0.01835	0.01564							0.05486	-0.16883	2
		952.5	0.00721	0.02435							0.05364	-0.16908	2
		952	-0.000279844	0.0096							0.05241	-0.16932	2
		951.5	-0.00327	-0.00526							0.05118	-0.16956	2
		951	-0.00425	-0.01268							0.04995	-0.16979	2
		950.5	0.000145868	-0.01652							0.04872	-0.17001	2
		950	0.0023	-0.0159							0.04748	-0.17023	2
		949.5	0.006	-0.00263							0.04625	-0.17044	2
		949	0.01673	0.00838							0.04501	-0.17064	2
		948.5	0.02362	0.01252							0.04377	-0.17083	2
		948	0.01807	0.01938							0.04253	-0.17102	2
		947.5	0.01181	0.02113							0.04129	-0.1712	2
		947	0.003	0.01016							0.04005	-0.17138	2
		946.5	-0.01038	-0.00167							0.0388	-0.17155	2
		946	-0.01628	-0.0166							0.03755	-0.17171	2
		945.5	-0.0148	-0.03973							0.03631	-0.17186	2
		945	-0.00548	-0.04274							0.03506	-0.17201	2
		944.5	-0.000969848	-0.0203							0.03381	-0.17215	2
		944	-0.00801	0.01077							0.03255	-0.17228	2
		943.5	0.00171	0.03801							0.0313	-0.1724	2
		943	0.01358	0.04561							0.03005	-0.17252	2
		942.5	0.0083	0.02827							0.02879	-0.17263	2
		942	0.00509	0.00156							0.02754	-0.17274	2
		941.5	0.00713	-0.01453							0.02628	-0.17284	2
		941	0.00589	-0.02028							0.02502	-0.17293	2
		940.5	0.000550313	-0.02118							0.02376	-0.17301	2
		940	-0.00613	-0.01081							0.0225	-0.17308	2
		939.5	-0.01311	0.00655							0.02124	-0.17315	2
		939	-0.0168	0.02217							0.01998	-0.17322	2
		938.5	-0.01842	0.02321							0.01872	-0.17327	2
		938	-0.01145	0.00433							0.01746	-0.17332	2
		937.5	0.00911	-0.01145							0.0162	-0.17336	2
		937	0.02788	-0.01726							0.01494	-0.17339	2
		936.5	0.02786	-0.00922							0.01367	-0.17342	2
		936	0.00672	0.00425							0.01241	-0.17344	2
		935.5	-0.01331	0.00243							0.01115	-0.17345	2
		935	-0.01243	-0.00504							0.00988	-0.17346	2
		934.5	-0.00305	-0.01429							0.00862	-0.17346	2
		934	0.00307	-0.00695							0.00735	-0.17345	2
		933.5	0.000154535	0.01332							0.00609	-0.17343	2
		933	-0.00834	0.00951							0.00482	-0.17341	2
		932.5	-0.00837	0.00116							0.00356	-0.17338	2
		932	-0.0045	9.80551e-05							0.00229	-0.17334	2
		931.5	0.00015247	-0.01377							0.00103	-0.1733	2
		931	0.00592	-0.013							-0.000236691	-0.17325	2
		930.5	0.00021414	0.0082							-0.0015	-0.17319	2
		930	-0.00346	0.0066							-0.00277	-0.17312	2
		929.5	0.00104	-0.00281							-0.00403	-0.17305	2
		929	0.0031	0.00271							-0.00529	-0.17297	2
		928.5	0.0061	0.00636							-0.00656	-0.17289	2
		928	-0.00256	0.00168							-0.00782	-0.17279	2
		927.5	-0.01185	-0.00492							-0.00908	-0.17269	2
		927	-0.00102	-0.00267							-0.01034	-0.17259	2
		926.5	0.01174	0.00928							-0.0116	-0.17247	2
		926	0.00968	0.00979							-0.01287	-0.17235	2
		925.5	-0.000954004	-0.00139							-0.01413	-0.17222	2
		925	-0.00816	-0.00349							-0.01538	-0.17209	2
		924.5	-0.00209	-0.00688							-0.01664	-0.17194	2
		924	0.00291	-0.00344							-0.0179	-0.17179	2
		923.5	0.000631876	0.00747							-0.01916	-0.17164	2
		923	0.00402	0.00619							-0.02041	-0.17147	2
		922.5	0.00661	-0.00347							-0.02167	-0.1713	2
		922	0.00245	-0.0024							-0.02292	-0.17112	2
		921.5	-0.00822	0.0027							-0.02418	-0.17094	2
		921	-0.01381	-0.01197							-0.02543	-0.17075	2
		920.5	-0.00907	-0.01089							-0.02668	-0.17055	2
		920	0.00487	0.01717							-0.02793	-0.17034	2
		919.5	0.01628	0.02254							-0.02917	-0.17013	2
		919	0.00759	-0.00812							-0.03042	-0.16991	2
		918.5	-0.00597	-0.02524							-0.03167	-0.16969	2
		918	-0.00704	-0.007							-0.03291	-0.16945	2
		917.5	0.000201132	0.00622							-0.03415	-0.16921	2
		917	0.00652	0.01232							-0.03539	-0.16897	2
		916.5	0.000746046	0.01291							-0.03663	-0.16871	2
		916	-0.02134	0.00022466							-0.03787	-0.16845	2
		915.5	-0.02237	-0.0084							-0.03911	-0.16818	2
		915	0.00279	-0.00293							-0.04034	-0.16791	2
		914.5	0.02085	0.00675							-0.04157	-0.16763	2
		914	0.03055	-0.0045							-0.04281	-0.16734	2
		913.5	0.02626	-0.01719							-0.04403	-0.16705	2
		913	0.01164	-0.01143							-0.04526	-0.16674	2
		912.5	-0.00556	0.00499							-0.04649	-0.16644	2
		912	-0.0214	0.03417							-0.04771	-0.16612	2
		911.5	-0.0257	0.03764							-0.04893	-0.1658	2
		911	-0.01492	0.00211							-0.05015	-0.16547	2
		910.5	0.0046	-0.02431							-0.05137	-0.16513	2
		910	0.01103	-0.02741							-0.05258	-0.16479	2
		909.5	-0.00409	-0.01353							-0.05379	-0.16444	2
		909	-0.01305	0.0097							-0.055	-0.16409	2
		908.5	0.00437	0.01558							-0.05621	-0.16372	2
		908	0.01356	0.00597							-0.05742	-0.16335	2
		907.5	0.00761	0.00373							-0.05862	-0.16298	2
		907	0.00542	-0.00453							-0.05982	-0.1626	2
		906.5	-0.000717981	-0.02791							-0.06102	-0.16221	2
		906	1.1782e-05	-0.03464							-0.06221	-0.16181	2
		905.5	0.00443	-0.00614							-0.06341	-0.16141	2
		905	0.00375	0.0331							-0.0646	-0.161	2
		904.5	-0.000897062	0.05601							-0.06578	-0.16058	2
		904	-0.00572	0.03961							-0.06697	-0.16016	2
		903.5	-0.00433	-0.00324							-0.06815	-0.15973	2
		903	-0.00164	-0.02777							-0.06933	-0.1593	2
		902.5	0.00656	-0.02223							-0.0705	-0.15885	2
		902	0.00762	-0.01019							-0.07168	-0.15841	2
		901.5	-0.00225	-0.0038							-0.07285	-0.15795	2
		901	0.00179	-0.00355							-0.07401	-0.15749	2
		900.5	0.00293	-0.01747							-0.07518	-0.15702	2
		900	-0.01113	-0.01641							-0.07634	-0.15655	2
		899.5	-0.01517	0.00394							-0.0775	-0.15607	2
		899	-0.01058	0.01218							-0.07865	-0.15558	2
		898.5	-0.00768	0.02425							-0.0798	-0.15509	2
		898	0.00648	0.03665							-0.08095	-0.15459	2
		897.5	0.02347	0.02034							-0.08209	-0.15408	2
		897	0.02277	-0.00274							-0.08324	-0.15357	2
		896.5	0.00775	-0.01038							-0.08437	-0.15305	2
		896	-0.00994	-0.01014							-0.08551	-0.15253	2
		895.5	-0.01408	-0.01757							-0.08664	-0.152	2
		895	-0.0078	-0.02597							-0.08776	-0.15146	2
		894.5	0.000318692	-0.01543							-0.08889	-0.15092	2
		894	-0.000553576	0.00283							-0.09001	-0.15037	2
		893.5	-0.0121	0.01696							-0.09112	-0.14981	2
		893	-0.01599	0.01809							-0.09224	-0.14925	2
		892.5	-0.0092	-0.00289							-0.09334	-0.14868	2
		892	0.01038	-0.01776							-0.09445	-0.14811	2
		891.5	0.02724	-0.0102							-0.09555	-0.14753	2
		891	0.02044	-0.00943							-0.09664	-0.14694	2
		890.5	0.00315	-0.01198							-0.09774	-0.14635	2
		890	-0.0098	0.0036							-0.09883	-0.14575	2
		889.5	-0.02037	0.02003							-0.09991	-0.14515	2
		889	-0.00896	0.01874							-0.10099	-0.14454	2
		888.5	0.02199	0.00749							-0.10207	-0.14392	2
		888	0.02829	0.00649							-0.10314	-0.1433	2
		887.5	0.00927	0.01671							-0.10421	-0.14267	2
		887	-0.0117	0.01157							-0.10527	-0.14204	2
		886.5	-0.01874	-0.00603							-0.10633	-0.1414	2
		886	-0.01144	-0.02707							-0.10738	-0.14075	2
		885.5	0.00289	-0.04921							-0.10843	-0.1401	2
		885	0.01743	-0.02642							-0.10948	-0.13944	2
		884.5	0.01526	0.02263							-0.11052	-0.13878	2
		884	-0.00113	0.03449							-0.11156	-0.13811	2
		883.5	-0.01262	0.0235							-0.11259	-0.13744	2
		883	-0.01587	-0.00485							-0.11362	-0.13676	2
		882.5	-0.01209	-0.04568							-0.11464	-0.13607	2
		882	-0.00181	-0.05032							-0.11566	-0.13538	2
		881.5	0.00366	-0.01569							-0.11667	-0.13469	2
		881	0.00273	0.02577							-0.11768	-0.13399	2
		880.5	0.0027	0.05224							-0.11869	-0.13328	2
		880	0.00815	0.05443							-0.11969	-0.13257	2
		879.5	0.00846	0.02837							-0.12068	-0.13185	2
		879	0.0011	-0.01183							-0.12167	-0.13112	2
		878.5	-0.00178	-0.04625							-0.12265	-0.13039	2
		878	-0.00258	-0.06505							-0.12363	-0.12966	2
		877.5	-0.00909	-0.04349							-0.12461	-0.12892	2
		877	-0.01714	0.01106							-0.12558	-0.12818	2
		876.5	-0.01182	0.0504							-0.12654	-0.12742	2
		876	0.01224	0.05564							-0.1275	-0.12667	2
		875.5	0.02802	0.03021							-0.12845	-0.12591	2
		875	0.01846	-0.004							-0.1294	-0.12514	2
		874.5	-0.00493	-0.01466							-0.13034	-0.12437	2
		874	-0.03516	-0.01253							-0.13128	-0.12359	2
		873.5	-0.04969	-0.01801							-0.13221	-0.12281	2
		873	-0.02876	-0.01529							-0.13314	-0.12203	2
		872.5	0.00588	-0.0042							-0.13406	-0.12124	2
		872	0.02822	0.00728							-0.13498	-0.12044	2
		871.5	0.0327	0.02301							-0.13589	-0.11964	2
		871	0.0201	0.00719							-0.13679	-0.11883	2
		870.5	0.000750788	-0.02477							-0.13769	-0.11802	2
		870	-0.01226	-0.02815							-0.13859	-0.1172	2
		869.5	-0.01489	-0.01785							-0.13948	-0.11638	2
		869	-0.01589	0.01264							-0.14036	-0.11556	2
		868.5	-0.01875	0.03866							-0.14124	-0.11473	2
		868	-0.00989	0.02703							-0.14211	-0.11389	2
		867.5	0.01259	0.01098							-0.14297	-0.11305	2
		867	0.02468	-0.00711							-0.14383	-0.1122	2
		866.5	0.016	-0.03098							-0.14469	-0.11136	2
		866	-0.00173	-0.03936							-0.14553	-0.1105	2
		865.5	-0.01129	-0.00961							-0.14638	-0.10964	2
		865	-0.01241	0.04264							-0.14721	-0.10878	2
		864.5	-0.01331	0.05096							-0.14804	-0.10791	2
		864	-0.00435	0.00626							-0.14887	-0.10704	2
		863.5	0.00891	-0.03753							-0.14968	-0.10616	2
		863	0.01195	-0.05336							-0.15049	-0.10528	2
		862.5	0.0053	-0.04186							-0.1513	-0.1044	2
		862	-0.00422	-0.00933							-0.1521	-0.10351	2
		861.5	-0.0066	0.02557							-0.15289	-0.10261	2
		861	0.00145	0.05591							-0.15368	-0.10171	2
		860.5	0.00261	0.0554							-0.15446	-0.10081	2
		860	0.00134	0.01426							-0.15524	-0.0999	2
		859.5	0.00579	-0.02148							-0.156	-0.09899	2
		859	0.00319	-0.03554							-0.15677	-0.09808	2
		858.5	-0.0015	-0.03271							-0.15752	-0.09716	2
		858	-0.000865917	-0.02222							-0.15827	-0.09624	2
		857.5	0.00953	-0.01591							-0.15901	-0.09531	2
		857	0.01325	-0.00754							-0.15975	-0.09438	2
		856.5	0.000533148	0.00723							-0.16048	-0.09344	2
		856	-0.01561	0.02452							-0.1612	-0.0925	2
		855.5	-0.01934	0.04058							-0.16192	-0.09156	2
		855	0.00119	0.04834							-0.16263	-0.09061	2
		854.5	0.01836	0.02338							-0.16333	-0.08966	2
		854	0.01158	-0.01905							-0.16403	-0.08871	2
		853.5	-0.00418	-0.04357							-0.16472	-0.08775	2
		853	-0.01564	-0.03918							-0.1654	-0.08679	2
		852.5	-0.00496	-0.00705							-0.16608	-0.08582	2
		852	0.01751	0.02071							-0.16675	-0.08486	2
		851.5	0.0162	0.03031							-0.16742	-0.08388	2
		851	-0.00429	0.01944							-0.16807	-0.08291	2
		850.5	-0.01483	-0.00135							-0.16872	-0.08193	2
		850	-0.00431	-0.00866							-0.16936	-0.08095	2
		849.5	0.00523	-0.01424							-0.17	-0.07996	2
		849	0.00909	-0.01632							-0.17063	-0.07897	2
		848.5	0.01416	-0.00679							-0.17125	-0.07798	2
		848	0.01093	0.00229							-0.17187	-0.07698	2
		847.5	0.00545	0.01455							-0.17248	-0.07598	2
		847	0.00473	0.02417							-0.17308	-0.07498	2
		846.5	0.00418	0.01199							-0.17367	-0.07397	2
		846	0.0037	-0.01075							-0.17426	-0.07296	2
		845.5	0.00351	-0.02084							-0.17484	-0.07195	2
		845	0.00402	-0.00711							-0.17541	-0.07093	2
		844.5	0.00627	0.01873							-0.17598	-0.06992	2
		844	0.001	0.02824							-0.17654	-0.0689	2
		843.5	-0.00961	0.01221							-0.17709	-0.06787	2
		843	-0.0155	-0.00168							-0.17764	-0.06684	2
		842.5	-0.01766	-0.00356							-0.17817	-0.06581	2
		842	-0.01652	-0.01245							-0.1787	-0.06478	2
		841.5	-0.00498	-0.0312							-0.17923	-0.06375	2
		841	0.00262	-0.04882							-0.17974	-0.06271	2
		840.5	-0.000325363	-0.03997							-0.18025	-0.06167	2
		840	0.00461	0.00712							-0.18075	-0.06062	2
		839.5	0.01033	0.05841							-0.18125	-0.05958	2
		839	0.00532	0.0693							-0.18173	-0.05853	2
		838.5	-0.00932	0.04218							-0.18221	-0.05748	2
		838	-0.01857	0.0017							-0.18268	-0.05642	2
		837.5	-0.00902	-0.02872							-0.18315	-0.05537	2
		837	0.0098	-0.02635							-0.18361	-0.05431	2
		836.5	0.02342	-0.01013							-0.18406	-0.05325	2
		836	0.02324	-0.01465							-0.1845	-0.05218	2
		835.5	0.00976	-0.0292							-0.18493	-0.05112	2
		835	-0.01171	-0.03035							-0.18536	-0.05005	2
		834.5	-0.02807	-0.02184							-0.18578	-0.04898	2
		834	-0.0235	-0.01371							-0.18619	-0.04791	2
		833.5	-0.00317	-0.00288							-0.1866	-0.04683	2
		833	0.01171	0.0171							-0.18699	-0.04576	2
		832.5	0.01422	0.03706							-0.18738	-0.04468	2
		832	0.00428	0.03852							-0.18777	-0.0436	2
		831.5	-0.0073	0.02155							-0.18814	-0.04252	2
		831	-0.0042	0.00993							-0.18851	-0.04143	2
		830.5	-0.00236	0.01245							-0.18887	-0.04035	2
		830	-0.00795	0.01657							-0.18922	-0.03926	2
		829.5	-0.00529	0.00532							-0.18956	-0.03817	2
		829	0.00359	-0.01311							-0.1899	-0.03708	2
		828.5	0.02233	-0.02106							-0.19023	-0.03599	2
		828	0.04532	-0.01842							-0.19055	-0.03489	2
		827.5	0.02535	-0.01398							-0.19086	-0.0338	2
		827	-0.02888	-0.02442							-0.19117	-0.0327	2
		826.5	-0.06275	-0.04486							-0.19146	-0.0316	2
		826	-0.06451	-0.04266							-0.19175	-0.0305	2
		825.5	-0.04218	-0.0091							-0.19204	-0.0294	2
		825	-0.01013	0.02692							-0.19231	-0.02829	2
		824.5	0.0239	0.05419							-0.19258	-0.02719	2
		824	0.04197	0.05001							-0.19284	-0.02608	2
		823.5	0.03491	0.0202							-0.19309	-0.02497	2
		823	0.00614	0.00691							-0.19333	-0.02387	2
		822.5	-0.02616	-0.000381877							-0.19357	-0.02276	2
		822	-0.02852	-0.01883							-0.1938	-0.02165	2
		821.5	-0.00428	-0.03076							-0.19402	-0.02053	2
		821	0.01552	-0.03114							-0.19423	-0.01942	2
		820.5	0.0126	-0.02609							-0.19443	-0.01831	2
		820	0.000864259	-0.0007786							-0.19463	-0.01719	2
		819.5	-0.00791	0.02506							-0.19482	-0.01608	2
		819	-0.02123	0.02587							-0.195	-0.01496	2
		818.5	-0.0257	0.00374							-0.19517	-0.01384	2
		818	-0.00973	-0.02118							-0.19534	-0.01273	2
		817.5	0.00627	-0.0297							-0.19549	-0.01161	2
		817	0.01498	-0.03359							-0.19564	-0.01049	2
		816.5	0.01167	-0.02687							-0.19578	-0.00937	2
		816	-0.00139	-0.000799208							-0.19592	-0.00825	2
		815.5	0.000817769	0.03868							-0.19604	-0.00713	2
		815	0.01403	0.06759							-0.19616	-0.006	2
		814.5	0.01727	0.0583							-0.19627	-0.00488	2
		814	0.00654	0.01862							-0.19637	-0.00376	2
		813.5	-0.01006	-0.02888							-0.19646	-0.00264	2
		813	-0.01378	-0.04789							-0.19655	-0.00151	2
		812.5	-0.00288	-0.02495							-0.19663	-0.000391047	2
		812	0.00818	-0.00592							-0.1967	0.000732545	2
		811.5	0.0128	-0.01077							-0.19676	0.00186	2
		811	0.01499	0.00202							-0.19681	0.00298	2
		810.5	0.02007	0.02346							-0.19686	0.0041	2
		810	0.01518	0.01421							-0.1969	0.00523	2
		809.5	-0.000600329	-0.00386							-0.19693	0.00635	2
		809	-0.00603	-0.00628							-0.19695	0.00748	2
		808.5	-0.00422	-0.000143264							-0.19696	0.0086	2
		808	-0.00999	0.01084							-0.19697	0.00972	2
		807.5	-0.01794	0.02034							-0.19697	0.01085	2
		807	-0.01152	0.01579							-0.19696	0.01197	2
		806.5	0.00885	0.01313							-0.19694	0.01309	2
		806	0.031	0.01552							-0.19692	0.01422	2
		805.5	0.03901	0.00722							-0.19688	0.01534	2
		805	0.0212	-0.01185							-0.19684	0.01646	2
		804.5	-0.00467	-0.03298							-0.19679	0.01758	2
		804	-0.01918	-0.02347							-0.19673	0.0187	2
		803.5	-0.01989	0.0129							-0.19667	0.01982	2
		803	-0.00465	0.02927							-0.1966	0.02094	2
		802.5	0.01605	0.0143							-0.19651	0.02206	2
		802	0.01897	0.00228							-0.19643	0.02318	2
		801.5	0.00562	0.00452							-0.19633	0.0243	2
[truncated: 3 more rows]

## Sheet: Sheet2
Wavenumber	PC1	PC2	Spectra Names	PC1	PC2
Loadings	Loadings	Loadings	Scores	Scores	Scores
1799.5	0.0122	0.00949	856-S-4-26-29	0.00231	-0.01398
1799	-0.0038	-0.00724	1025-N-2-7-47	0.03266	0.02447
1798.5	-0.01536	-0.01204	1031-N-1-3-32	0.05907	-0.02432
1798	-0.01118	-0.00448	1121-S-4-24-25	0.0109	0.0392
1797.5	-0.01022	-0.000226645	1181-S-4-27-3	0.05375	-0.00783
1797	-0.000321866	0.01057	GW-9589-S-3-5-9	-0.01053	-0.05935
1796.5	0.012	0.01736	GW-9591-S-4-22-27	0.04105	0.04077
1796	0.00599	0.01453	GW-9860-N-1-22-44	-0.05359	0.00627
1795.5	-0.00623	0.00911	GW-9953-N	-0.02954	-0.04865
1795	-0.01325	0.000550842	LILC-26-4-S-23-13	-0.07265	0.03276
1794.5	-0.00839	-0.0103
1794	0.01454	-0.02109
1793.5	0.03195	-0.00713
1793	0.01515	0.00763
1792.5	-0.01642	-0.00254
1792	-0.02356	-0.00191
1791.5	-0.00883	0.00207
1791	-0.00196	-0.01084
1790.5	-0.0011	-0.01977
1790	0.00303	-0.00632
1789.5	0.00422	0.0097
1789	0.00178	0.00846
1788.5	-0.00316	0.0045
1788	-0.00612	0.000807325
1787.5	-0.00806	-0.00567
1787	-0.00663	-0.01028
1786.5	-0.00229	-0.00678
1786	0.000738853	0.00514
1785.5	0.00664	0.01365
1785	0.00766	0.01571
1784.5	0.00113	-0.00155
1784	-0.00352	-0.02196
1783.5	-0.00735	-0.01182
1783	-0.01012	0.000557075
1782.5	-0.00859	9.26436e-05
1782	-0.000468446	0.00431
1781.5	0.01025	0.01987
1781	0.0133	0.02464
1780.5	0.0128	0.01502
1780	0.00498	0.00636
1779.5	-0.00524	-0.01206
1779	-0.00559	-0.01527
1778.5	-0.00272	-0.00499
1778	-0.00207	-0.00663
1777.5	-0.01	-0.00849
1777	-0.01576	-0.00231
1776.5	-0.00482	0.01578
1776	0.0042	0.02784
1775.5	0.000914835	0.01837
1775	-0.00126	0.00174
1774.5	0.00394	-0.01165
1774	0.01924	-0.01146
1773.5	0.02616	0.00575
1773	-0.0031	0.02015
1772.5	-0.02721	0.00664
1772	-0.01083	-0.02508
1771.5	0.00557	-0.0399
1771	0.00268	-0.03035
1770.5	-0.01048	-0.01248
1770	-0.0147	-0.000828192
1769.5	0.00245	0.01768
1769	0.02203	0.04814
1768.5	0.02384	0.04548
1768	0.00625	0.000788828
1767.5	-0.01057	-0.02892
1767	-0.01577	-0.02442
1766.5	-0.01279	0.00225
1766	-0.00113	0.02618
1765.5	0.00325	0.01367
1765	-0.0047	-0.00788
1764.5	-0.00528	-0.01113
1764	-0.00462	-0.00924
1763.5	-0.00829	0.00302
1763	0.00525	0.01866
1762.5	0.02409	0.01844
1762	0.0207	0.00517
1761.5	0.00556	-0.02937
1761	-0.0117	-0.04336
1760.5	-0.01327	-0.01428
1760	0.000653019	0.00656
1759.5	-0.00482	0.00887
1759	-0.01565	0.0036
1758.5	-0.0062	-0.000260372
1758	0.01017	0.00807
1757.5	0.01861	0.0335
1757	0.01491	0.03574
1756.5	0.0028	-0.00938
1756	-0.01135	-0.03752
1755.5	-0.01703	-0.02056
1755	-0.00953	0.00358
1754.5	-0.00163	0.01013
1754	-0.00545	0.00146
1753.5	-0.0122	-0.00318
1753	-0.00492	-0.01183
1752.5	0.02075	-0.01401
1752	0.0433	0.01396
1751.5	0.02544	0.02785
1751	-0.01154	-0.00515
1750.5	-0.02084	-0.03498
1750	-0.00414	-0.00864
1749.5	0.01315	0.03152
1749	0.01388	0.0345
1748.5	-0.00453	0.01359
1748	-0.02294	0.00349
1747.5	-0.01837	-5.22317e-05
1747	-0.00422	-0.01453
1746.5	0.01331	-0.02263
1746	0.02576	-0.0235
1745.5	0.00619	-0.01967
1745	-0.01484	-0.00732
1744.5	-0.00712	0.01235
1744	0.00352	0.03042
1743.5	0.00974	0.02405
1743	0.00876	-0.00222
1742.5	-0.00888	-0.01672
1742	-0.01723	-0.00473
1741.5	0.00219	0.00462
1741	0.03022	-0.00519
1740.5	0.03812	0.00312
1740	0.00891	0.01234
1739.5	-0.03841	-0.01165
1739	-0.04943	-0.03012
1738.5	-0.01314	-0.01476
1738	0.02139	0.01011
1737.5	0.01621	0.01026
1737	-0.00653	0.00136
1736.5	-0.00906	0.00234
1736	0.01505	-0.00752
1735.5	0.05672	-0.03156
1735	0.06777	-0.0271
1734.5	0.02037	-0.00988
1734	-0.02548	-0.03475
1733.5	-0.03947	-0.03298
1733	-0.04188	0.02453
1732.5	-0.02952	0.04491
1732	-0.00899	0.01239
1731.5	0.00801	-0.00533
1731	0.00792	0.01807
1730.5	-0.00335	0.04097
1730	-0.00504	0.02908
1729.5	-0.00112	-0.005
1729	-0.00196	-0.0264
1728.5	-0.00401	-0.02203
1728	0.00343	-0.00686
1727.5	0.00789	0.00195
1727	0.00776	-0.00503
1726.5	0.00393	-0.01068
1726	-0.00227	-0.00942
1725.5	-0.00497	-0.000842642
1725	-0.01146	0.00609
1724.5	-0.0046	0.00431
1724	0.0085	0.0133
1723.5	0.00789	0.01836
1723	0.00339	0.00778
1722.5	0.00405	-0.00752
1722	0.01029	-0.02174
1721.5	0.00109	-0.02502
1721	-0.01755	-0.00829
1720.5	-0.01761	0.01301
1720	-0.00281	0.023
1719.5	0.01674	0.03068
1719	0.02365	0.03213
1718.5	0.02228	0.01952
1718	0.01743	-0.02534
1717.5	-0.00936	-0.07388
1717	-0.03494	-0.04819
1716.5	-0.02712	0.00836
1716	0.01056	0.02123
1715.5	0.03715	0.01859
1715	0.02142	0.03131
1714.5	-0.00768	0.02799
1714	-0.01817	-0.00425
1713.5	-0.01327	-0.02926
1713	-0.00536	-0.02329
1712.5	-0.0014	-0.00399
1712	0.00464	0.00275
1711.5	0.00765	0.00537
1711	0.00535	0.00468
1710.5	0.00556	0.0116
1710	-0.00317	0.01414
1709.5	-0.00911	-0.00234
1709	-0.00615	-0.00338
1708.5	-0.00769	0.00487
1708	0.00564	0.00557
1707.5	0.03145	0.0045
1707	0.02313	-0.00616
1706.5	-0.00931	-0.01694
1706	-0.02147	-0.00477
1705.5	-0.01593	0.02049
1705	-0.00559	0.02307
1704.5	-0.000131475	0.000108076
1704	-0.00474	-0.0165
1703.5	-0.01955	-0.01152
1703	-0.0319	0.02199
1702.5	-0.02162	0.06084
1702	0.0347	0.04301
1701.5	0.12165	-0.01967
1701	0.12197	-0.02056
1700.5	-0.0036	-0.04349
1700	-0.10793	-0.1385
1699.5	-0.10713	-0.07958
1699	-0.05123	0.063
1698.5	0.0015	0.08166
1698	0.01955	0.03654
1697.5	0.03902	-0.00305
1697	0.09032	-0.01049
1696.5	0.11671	0.03208
1696	0.05254	0.04842
1695.5	-0.06767	-0.0107
1695	-0.11651	-0.04298
1694.5	-0.05307	-0.00898
1694	0.01805	0.00854
1693.5	0.03735	0.00075685
1693	0.02549	-0.00133
1692.5	0.00579	-0.00708
1692	0.00617	-0.01078
1691.5	0.01225	0.00613
1691	0.00376	0.01915
1690.5	-0.00514	0.0014
1690	-0.01034	-0.01342
1689.5	-0.00558	0.00295
1689	0.007	0.01895
1688.5	0.00814	0.01797
1688	-0.00348	0.00891
1687.5	-0.02711	-0.00539
1687	-0.04429	-0.00455
1686.5	-0.01429	-0.01355
1686	0.06577	-0.05424
1685.5	0.12383	-0.03886
1685	0.06472	0.09222
1684.5	-0.05406	0.15686
1684	-0.0823	0.00542
1683.5	-0.03955	-0.13748
1683	-0.03103	-0.10903
1682.5	-0.03288	-0.03323
1682	-0.00401	0.01578
1681.5	0.02198	0.05265
1681	0.03257	0.06443
1680.5	0.03042	0.03146
1680	0.00936	-0.0208
1679.5	-0.0135	-0.04572
1679	-0.01907	-0.02441
1678.5	-0.01243	0.01663
1678	-0.01455	0.03708
1677.5	-0.02165	0.04185
1677	-0.00262	0.02465
1676.5	0.04042	-0.01085
1676	0.06716	-0.03234
1675.5	0.02837	-0.0457
1675	-0.05026	-0.04668
1674.5	-0.07716	-0.01518
1674	-0.03852	0.02322
1673.5	0.0129	0.02121
1673	0.03901	0.00215
1672.5	0.02441	0.00713
1672	-0.00979	0.02135
1671.5	-0.02773	0.02457
1671	-0.02049	0.00635
1670.5	0.0089	-0.03727
1670	0.0379	-0.05378
1669.5	0.02619	-0.01518
1669	-0.02371	0.01459
1668.5	-0.0481	0.01582
1668	-0.02407	0.01778
1667.5	0.00447	0.01434
1667	0.01633	-0.00417
1666.5	0.00801	-0.0194
1666	-0.00964	-0.01076
1665.5	-0.01449	0.01368
1665	-0.00723	0.0248
1664.5	0.01054	0.02039
1664	0.04051	-0.000802813
1663.5	0.04308	-0.02925
1663	-0.00946	-0.02265
1662.5	-0.05959	0.00499
1662	-0.05063	0.01344
1661.5	-0.0096	0.00298
1661	0.01603	-0.01073
1660.5	0.01744	-0.01096
1660	0.00693	0.00143
1659.5	-0.00108	0.00661
1659	0.00166	0.00198
1658.5	0.00948	-0.0044
1658	0.01001	-0.00308
1657.5	-0.00241	0.00755
1657	-0.02208	0.02979
1656.5	-0.02804	0.04415
1656	-0.02031	0.03805
1655.5	-0.01087	0.01618
1655	0.00774	-0.03588
1654.5	0.04001	-0.10857
1654	0.07803	-0.1109
1653.5	0.07877	0.00387
1653	0.00474	0.06117
1652.5	-0.09817	0.02844
1652	-0.12692	0.04495
1651.5	-0.06238	0.04785
1651	-0.00355	0.00125
1650.5	0.00778	-0.01914
1650	0.00867	-0.01072
1649.5	0.00917	-0.00485
1649	0.01216	-0.015
1648.5	0.01573	-0.01569
1648	0.00888	-0.00178
1647.5	0.00723	-0.01772
1647	0.01416	-0.06214
1646.5	0.00968	-0.05452
1646	-0.00765	0.01305
1645.5	-0.02462	0.0606
1645	-0.03389	0.04909
1644.5	-0.02633	-0.00354
1644	-0.00479	-0.03947
1643.5	0.00588	-0.02718
1643	0.00281	0.00487
1642.5	-0.00131	0.02702
1642	-0.00357	0.0292
1641.5	-0.00352	0.01998
1641	-0.00475	0.0096
1640.5	-0.00593	-0.00458
1640	-0.01395	-0.00959
1639.5	-0.02081	-0.0043
1639	-0.01175	-0.00413
1638.5	-0.00987	0.00147
1638	-0.00739	0.02906
1637.5	0.00568	0.04466
1637	0.01847	-0.00186
1636.5	0.02831	-0.1143
1636	0.00768	-0.16062
1635.5	-0.02313	-0.03565
1635	-0.03108	0.09858
1634.5	-0.03073	0.09691
1634	-0.01844	0.03358
1633.5	0.00361	-0.00139
1633	0.019	-0.00964
1632.5	0.01757	-0.01053
1632	-0.00401	-0.00144
1631.5	-0.02512	0.01697
1631	-0.03448	0.03388
1630.5	-0.02916	0.03349
1630	-0.00185	0.01256
1629.5	0.02449	-0.00864
1629	0.02217	-0.0166
1628.5	-0.00459	-0.01346
1628	-0.01104	-0.000170807
1627.5	0.00956	0.01441
1627	0.01697	0.01879
1626.5	0.00812	0.00959
1626	-0.00617	0.0086
1625.5	-0.00242	0.01606
1625	0.00975	-0.00441
1624.5	0.00106	-0.04464
1624	-0.00783	-0.05392
1623.5	-0.0036	-0.01084
1623	0.00569	0.04261
1622.5	0.0137	0.06054
1622	0.02115	0.04302
1621.5	0.02395	0.02363
1621	0.018	0.02674
1620.5	0.01498	0.02588
1620	0.01571	0.00977
1619.5	0.00931	0.0114
1619	0.00134	0.00657
1618.5	0.02051	-0.0263
1618	0.08752	-0.09134
1617.5	0.14808	-0.12886
1617	0.08712	-0.03152
1616.5	-0.06128	0.09638
1616	-0.1166	0.11959
1615.5	-0.04599	0.06704
1615	0.03272	0.01287
1614.5	0.05131	-0.0056
1614	0.03872	-0.01427
1613.5	0.03333	-0.03192
1613	0.02513	-0.02752
1612.5	0.01419	-0.01329
1612	0.00821	-0.01398
1611.5	-0.01068	-0.00871
1611	-0.02554	-0.01179
1610.5	-0.01702	-0.01106
1610	-0.00689	0.00762
1609.5	0.000315432	0.01441
1609	0.00172	0.00209
1608.5	-0.00895	-0.00891
1608	-0.01512	0.000919859
1607.5	-0.00393	0.01026
1607	0.00449	-0.00501
1606.5	-0.000822273	-0.02206
1606	-0.00139	-0.02213
1605.5	-0.00344	-0.02082
1605	-0.01186	-0.02004
1604.5	-0.01411	-0.00434
1604	-0.00978	0.02419
1603.5	-0.00773	0.02275
1603	-0.00855	-0.00412
1602.5	-0.01459	-0.01539
1602	-0.02227	-0.01842
1601.5	-0.02815	-0.0124
1601	-0.03508	-0.00562
1600.5	-0.02694	-0.0042
1600	-0.00366	-0.00585
1599.5	0.01143	-0.01803
1599	-0.00222	-0.01812
1598.5	-0.02636	-0.00819
1598	-0.03387	-0.00796
1597.5	-0.02585	-0.00356
1597	-0.01734	0.00855
1596.5	-0.01987	0.00968
1596	-0.01826	0.00586
1595.5	-0.0129	0.000623123
1595	-0.0127	-0.01687
1594.5	-0.00386	-0.0341
1594	0.014	-0.0271
1593.5	0.01825	0.00419
1593	0.00757	0.01032
1592.5	-0.00729	-0.00475
1592	-0.01942	0.00239
1591.5	-0.01014	0.01026
1591	0.00207	0.00619
1590.5	-0.00235	0.00992
1590	0.00265	0.01588
1589.5	0.01424	0.00355
1589	0.00775	-0.01484
1588.5	0.00231	-0.02334
1588	0.00556	-0.01457
1587.5	0.000433018	0.0116
1587	-0.00135	0.01965
1586.5	0.00357	0.0144
1586	0.00136	0.01348
1585.5	0.00157	0.00237
1585	0.01164	-0.01097
1584.5	0.01449	-0.01014
1584	0.00748	-0.00291
1583.5	0.00863	0.00199
1583	0.01146	0.00309
1582.5	0.00439	0.00162
1582	0.00766	0.00886
1581.5	0.01357	0.01187
1581	0.0037	0.00195
1580.5	-0.00601	-0.00999
1580	0.000259889	-0.01092
1579.5	0.00826	0.000850589
1579	0.00545	0.02561
1578.5	0.00465	0.04336
1578	0.01712	0.02495
1577.5	0.04888	-0.00658
1577	0.05789	-0.02074
1576.5	0.01076	-0.01975
1576	-0.03985	-0.01307
1575.5	-0.04054	0.000404985
1575	-0.00716	0.00946
1574.5	0.01573	0.01085
1574	0.02031	0.01136
1573.5	0.01455	0.01478
1573	0.01396	0.01265
1572.5	0.01191	0.00764
1572	-0.00013902	0.00679
1571.5	0.00786	0.000293301
1571	0.0287	-0.01285
1570.5	0.03232	-0.02552
1570	0.00899	-0.01155
1569.5	-0.01448	-0.00392
1569	-0.01902	-0.01755
1568.5	-0.01596	-0.01794
1568	-0.00959	-0.00948
1567.5	-0.00558	0.01081
1567	-0.00435	0.02362
1566.5	0.00681	0.01671
1566	0.02325	0.01042
1565.5	0.01969	0.0128
1565	0.00422	0.01605
1564.5	-0.0087	-0.00317
1564	-0.01527	-0.02692
1563.5	-0.00765	-0.02386
1563	-0.00535	-0.000254989
1562.5	-0.0276	0.0345
1562	-0.04183	0.03627
1561.5	-0.00924	-0.0157
1561	0.0554	-0.0734
1560.5	0.08473	-0.052
1560	0.04628	0.03656
1559.5	0.00536	0.05901
1559	0.00802	0.03057
1558.5	0.01238	0.01508
1558	-0.03246	-0.02326
1557.5	-0.07947	-0.04066
1557	-0.06567	0.00355
1556.5	-0.02332	0.02849
1556	0.02231	0.0148
1555.5	0.06403	-0.00104
1555	0.06982	-0.01599
1554.5	0.02929	-0.02627
1554	-0.0252	-0.02279
1553.5	-0.04738	-0.0029
1553	-0.03233	0.00648
1552.5	-0.01323	-0.002
1552	-0.00761	-0.01357
1551.5	-0.00243	-0.00496
1551	0.01919	0.02702
1550.5	0.05038	0.05725
1550	0.05113	0.04165
1549.5	0.01361	-0.01492
1549	-0.02197	-0.04588
1548.5	-0.03519	-0.03824
1548	-0.03133	-0.00474
1547.5	-0.02439	0.01869
1547	-0.01194	0.00521
1546.5	0.01445	-0.0242
1546	0.04279	-0.02162
1545.5	0.03651	0.02211
1545	-0.01315	0.04985
1544.5	-0.05616	0.04502
1544	-0.05023	0.02476
1543.5	0.00631	0.00811
1543	0.06564	-0.00884
1542.5	0.06722	-0.02856
1542	0.00899	-0.03171
1541.5	-0.04205	-0.02183
1541	-0.02685	-0.03482
1540.5	0.02947	-0.05606
1540	0.05517	0.00556
1539.5	0.01454	0.08496
1539	-0.04498	0.05381
1538.5	-0.06738	-0.00495
1538	-0.04889	-0.00747
1537.5	-0.00481	-0.00477
1537	0.02396	-0.00698
1536.5	0.0117	0.0116
1536	-0.01519	0.02523
1535.5	-0.00827	0.00733
1535	0.03306	-0.01917
1534.5	0.05572	-0.02945
1534	0.02514	-0.01891
1533.5	-0.03326	-0.01562
1533	-0.05418	-0.02258
1532.5	-0.0319	0.00235
1532	-0.00829	0.03079
1531.5	0.000492697	0.02592
1531	0.000857469	0.00927
1530.5	-0.0011	0.000599797
1530	-0.00262	-0.000894394
1529.5	-0.00129	-0.00193
1529	-3.32686e-05	-0.00496
1528.5	-0.00643	-0.01242
1528	-0.01862	-0.00735
1527.5	-0.01404	0.01051
1527	0.00507	-0.00306
1526.5	0.01669	-0.02683
1526	0.01559	-0.01236
1525.5	-0.00175	0.02281
1525	-0.02285	0.04434
1524.5	-0.02171	0.03451
1524	-0.00177	0.00756
1523.5	0.01219	-0.01786
1523	0.01593	-0.03589
1522.5	0.03037	-0.05108
1522	0.03538	-0.04563
1521.5	0.00889	-0.00144
1521	-0.01844	0.0348
1520.5	-0.03525	0.0302
1520	-0.0436	0.01691
1519.5	-0.03869	0.00871
1519	-0.00909	-0.0136
1518.5	0.0236	-0.02651
1518	0.01889	-0.00937
1517.5	-0.00468	0.000662363
1517	-0.02267	-0.01941
1516.5	-0.03716	-0.0296
1516	-0.04008	-0.00207
1515.5	-0.02117	0.02429
1515	-0.00404	0.02722
1514.5	-0.00796	0.0067
1514	-0.01788	-0.03236
1513.5	-0.02464	-0.0414
1513	-0.02452	-0.00825
1512.5	-0.01463	0.01895
1512	-0.00361	0.00967
1511.5	-0.00906	-0.00797
1511	-0.01569	-0.00275
1510.5	-0.00773	0.00595
1510	-0.00555	0.0087
1509.5	-0.00679	0.01229
1509	0.00165	0.0101
1508.5	0.01292	0.00333
1508	0.01806	-0.00744
1507.5	0.01209	-0.0138
1507	0.01034	0.00139
1506.5	0.03164	0.00219
1506	0.02607	-0.0298
1505.5	-0.0133	-0.02897
1505	-0.02722	0.01903
1504.5	-0.0186	0.03877
1504	-0.00693	0.01693
1503.5	-0.000974953	0.00343
1503	-0.00607	0.000875647
1502.5	-0.00694	-0.00323
1502	0.005	-0.00438
1501.5	0.01846	-0.00141
1501	0.0227	0.01465
1500.5	0.01466	0.02495
1500	0.0062	0.00691
1499.5	0.00162	-0.01322
1499	-0.00763	-0.02088
1498.5	-0.01361	-0.01851
1498	-0.01194	-0.00544
1497.5	0.000809823	0.00202
1497	0.02152	0.01189
1496.5	0.01844	0.02582
1496	0.00104	0.01118
1495.5	-0.00949	-0.0193
1495	-0.01606	-0.02347
1494.5	-0.00804	-0.00651
1494	-0.000910023	0.00426
1493.5	0.000352616	0.0166
1493	0.00284	0.0178
1492.5	-0.00493	0.00144
1492	-0.01496	-0.01632
1491.5	-0.00842	-0.02673
1491	0.01098	-0.000720306
1490.5	0.03554	0.04415
1490	0.0471	0.03909
1489.5	0.02467	-0.01016
1489	0.00583	-0.03529
1488.5	0.00367	-0.02892
1488	-0.00387	-0.00908
1487.5	-0.00774	0.01708
1487	-0.00565	0.02136
1486.5	0.0045	0.00412
1486	0.01406	0.00233
1485.5	0.01407	0.00978
1485	0.01222	0.00253
1484.5	0.00644	-0.00651
1484	2.20352e-05	-0.0019
1483.5	-0.00421	0.00889
1483	-0.00124	0.00595
1482.5	0.00888	0.00358
1482	0.01417	0.00929
1481.5	0.01196	0.00271
1481	0.0047	-0.00539
1480.5	-0.00417	-0.00497
1480	-0.00309	0.000529423
1479.5	0.00263	0.01434
1479	-0.00249	0.02092
1478.5	-0.00518	0.00113
1478	0.00506	-0.02296
1477.5	0.03315	-0.01385
1477	0.05559	0.0226
1476.5	0.03679	0.02951
1476	-0.00764	0.000583235
1475.5	-0.03713	-0.01938
1475	-0.02928	-0.01182
1474.5	0.00279	0.0159
1474	0.0318	0.03092
1473.5	0.04147	0.01352
1473	0.03352	-0.027
1472.5	0.00752	-0.05106
1472	-0.02466	-0.04232
1471.5	-0.04046	-0.01733
1471	-0.03534	0.01524
1470.5	-0.01872	0.02205
1470	0.00145	0.00583
1469.5	0.01288	0.00625
1469	0.00316	0.00639
1468.5	-0.00267	0.00247
1468	0.00266	0.00784
1467.5	-0.0035	0.00228
1467	-0.00918	0.000839743
1466.5	0.00815	0.0027
1466	0.03541	0.00548
1465.5	0.04624	0.01725
1465	0.02182	-0.00525
1464.5	-0.02472	-0.03192
1464	-0.04666	-0.0111
1463.5	-0.02229	0.01147
1463	0.01553	0.0086
1462.5	0.02622	0.00684
1462	0.01881	-0.000921369
1461.5	0.009	-0.00719
1461	3.37986e-05	0.01157
1460.5	-0.00317	0.01721
1460	-0.000432093	0.01312
1459.5	0.000439716	0.02315
1459	-0.00887	0.01967
1458.5	0.00478	0.000959987
1458	0.06648	-0.00705
1457.5	0.11203	-0.00569
1457	0.04108	-0.02086
1456.5	-0.09798	-0.03926
1456	-0.13134	-0.01733
1455.5	-0.0427	0.01295
1455	0.03874	-0.00347
1454.5	0.04803	-0.01856
1454	0.01369	0.00361
1453.5	-0.00927	0.0233
1453	2.69423e-05	0.02792
1452.5	0.01183	0.01904
1452	0.01238	-0.00698
1451.5	0.00755	-0.00915
1451	-0.00896	0.01719
1450.5	-0.03046	0.0196
1450	-0.03104	0.00749
1449.5	0.002	0.00552
1449	0.03448	0.000572133
1448.5	0.02722	-0.01003
1448	-0.01299	-0.01805
1447.5	-0.03237	-0.02588
1447	-0.01906	-0.01587
1446.5	-0.00587	0.01198
1446	0.00123	0.01856
1445.5	-0.00598	0.00986
1445	-0.01767	-0.00902
1444.5	-0.02143	-0.02193
1444	-0.01774	-0.0076
1443.5	-0.00833	-0.000936767
1443	-0.0091	0.000631135
1442.5	-0.01693	0.00884
1442	-0.02602	-0.000795409
1441.5	-0.01953	-0.02079
1441	-0.00209	-0.0285
1440.5	-0.00519	-0.02518
1440	-0.02026	-0.00681
1439.5	-0.03227	0.01166
1439	-0.03778	0.01067
1438.5	-0.02286	-0.005
1438	0.000891856	-0.02685
1437.5	0.00144	-0.01648
1437	-0.00883	0.00529
1436.5	-0.01089	-0.01106
1436	-0.01584	-0.02595
1435.5	-0.01565	-0.01524
1435	-0.00452	-0.00943
1434.5	-0.000821695	-0.00742
1434	-0.00877	-0.00258
1433.5	-0.01772	0.00185
1433	-0.01325	0.00988
1432.5	-0.00499	0.000895557
1432	-0.00729	-0.00813
1431.5	-0.00225	0.00325
1431	0.01365	-0.00285
1430.5	0.01374	-0.01513
1430	-0.00281	-0.00638
1429.5	-0.00483	-0.005
1429	0.00484	-0.00227
1428.5	0.00396	0.01125
1428	-0.000866293	0.01198
1427.5	-0.000247168	-0.00167
1427	0.00668	-0.00804
1426.5	0.01162	0.00278
1426	0.00304	-0.00267
1425.5	-0.00524	-0.01846
1425	0.00666	5.90386e-05
1424.5	0.02389	0.03677
1424	0.03105	0.03838
1423.5	0.02803	0.0141
1423	0.00747	-0.00337
1422.5	-0.01274	-0.01577
1422	-0.01647	-0.01439
1421.5	-0.00304	-0.000951506
1421	0.02285	-0.00673
1420.5	0.03997	-0.00278
1420	0.03364	0.03892
1419.5	0.0121	0.04087
1419	0.000871741	-0.01018
1418.5	-0.00819	-0.03101
1418	-0.00978	-0.00939
1417.5	0.00496	0.01687
1417	0.00705	0.02638
1416.5	0.00431	0.01243
1416	0.00531	-0.000943922
1415.5	0.00324	-0.00346
1415	0.0034	-0.00565
1414.5	0.00284	-0.00768
1414	-0.00467	-0.01355
1413.5	-0.00293	-0.00979
1413	0.01261	0.01187
1412.5	0.01209	0.02337
1412	0.00827	0.01871
1411.5	0.01476	0.01085
1411	0.00178	0.000501498
1410.5	-0.01115	-0.00776
1410	-0.00251	-0.01369
1409.5	-0.00189	-0.0096
1409	0.000520415	0.000854135
1408.5	0.01193	0.00568
1408	0.01003	0.00459
1407.5	0.00379	-0.00865
1407	-0.00145	-0.01801
1406.5	-0.008	-4.24279e-06
1406	-0.00915	0.03082
1405.5	0.000154114	0.03808
1405	0.01252	0.01463
1404.5	0.01634	-0.00743
1404	0.01273	-0.01463
1403.5	0.0041	-0.02253
1403	-0.00358	-0.02299
1402.5	-0.00148	-0.00323
1402	-0.00181	0.01543
1401.5	-0.01752	0.01616
1401	-0.01766	0.00701
1400.5	0.00465	0.00317
1400	0.01234	0.00976
1399.5	0.01061	0.00836
1399	0.00333	-0.00988
1398.5	-0.006	-0.02173
1398	-0.00464	-0.01824
1397.5	-0.00685	-0.00517
1397	-0.0107	0.000515016
1396.5	-0.00791	-0.000881138
1396	0.00267	0.01006
1395.5	0.01879	0.01758
1395	0.02876	0.01868
1394.5	0.01845	0.00884
1394	-0.0103	-0.01198
1393.5	-0.02952	-0.02146
1393	-0.01875	-0.01827
1392.5	0.00397	-0.0027
1392	0.00325	0.01063
1391.5	-0.00687	0.014
1391	0.00239	0.01627
1390.5	0.000848794	0.00514
1390	-0.01662	-0.0079
1389.5	-0.0211	-0.01414
1389	-0.01048	-0.02246
1388.5	0.00763	-0.0017
1388	0.0194	0.03031
1387.5	0.01439	0.01622
1387	-0.00322	-0.01725
1386.5	-0.01365	-0.02413
1386	-0.0097	-0.00352
1385.5	-0.00439	0.02059
1385	-0.0034	0.0241
1384.5	-0.0037	0.0105
1384	-0.00532	-0.00449
1383.5	-0.00755	-0.00692
1383	0.004	-0.00366
1382.5	0.01968	-0.00305
1382	0.01575	0.000964935
1381.5	0.00195	-0.000693114
1381	-0.00474	-0.000415211
1380.5	-0.00295	0.00619
1380	0.00168	0.0039
1379.5	0.00235	-0.00261
1379	0.00308	-0.00322
1378.5	-0.000483347	-0.00254
1378	-0.00651	-0.00929
1377.5	-0.00187	-0.01098
1377	-0.00473	-0.00495
1376.5	-0.00649	-0.00503
1376	-0.00177	0.000747528
1375.5	7.16994e-05	0.00441
1375	0.00607	0.00622
1374.5	0.01326	0.01951
1374	0.0129	0.01252
1373.5	-0.00258	-0.00814
1373	-0.01009	-0.01829
1372.5	-0.00436	-0.01529
1372	-0.00319	-0.00842
1371.5	-0.00698	-0.00907
1371	-0.01038	-0.00416
1370.5	-0.00526	-0.00387
1370	0.00141	-0.00571
1369.5	0.000513026	0.0065
1369	0.00198	0.01541
1368.5	0.00237	0.01842
1368	-0.00519	0.01326
1367.5	-0.01878	0.00978
1367	-0.02413	0.02244
1366.5	-0.00432	0.01469
1366	0.02096	-0.02991
1365.5	0.03269	-0.07235
1365	0.02704	-0.07283
1364.5	0.0111	-0.02173
1364	-0.00449	0.04157
1363.5	-0.01297	0.06146
1363	-0.00573	0.04019
1362.5	0.00121	0.0017
1362	0.00364	-0.0232
1361.5	0.0105	-0.01973
1361	0.01414	-0.01757
1360.5	0.0098	-0.01431
1360	-0.00699	-0.0055
1359.5	-0.02328	0.0116
1359	-0.01954	0.02787
1358.5	-0.01005	0.01761
1358	-0.00493	0.00156
1357.5	0.00578	-0.000720228
1357	0.00843	0.00478
1356.5	0.000961805	0.00904
1356	0.00502	0.00938
1355.5	0.00702	0.00422
1355	0.00232	-0.00551
1354.5	0.00682	-0.01392
1354	0.00199	-0.01727
1353.5	-0.00722	-0.01057
1353	-0.00109	-0.00228
1352.5	-0.000509391	-0.00195
1352	-0.0011	-0.00154
1351.5	0.00596	-0.00473
1351	0.00587	-0.01099
1350.5	0.00599	-0.00581
1350	0.00677	0.01057
1349.5	0.00155	0.01856
1349	-0.00907	0.00824
1348.5	-0.01593	-0.00974
1348	-0.01105	-0.00583
1347.5	-0.000651174	0.01184
1347	0.00827	0.0099
1346.5	0.0123	0.00304
1346	0.00721	-0.00997
1345.5	-0.00775	-0.01904
1345	-0.00882	-0.000514669
1344.5	0.0021	0.01097
1344	0.0024	4.65522e-05
1343.5	0.000920879	-0.00828
1343	-0.00167	-0.01741
1342.5	-0.00904	-0.01852
1342	-0.01216	0.00633
1341.5	-0.01427	0.02445
1341	-0.02008	0.01768
1340.5	-0.01544	0.01366
1340	0.00521	0.01321
1339.5	0.02089	0.000323293
1339	0.01517	-0.01188
1338.5	-0.00241	-0.01341
1338	-0.01421	-0.00451
1337.5	-0.01359	0.00933
1337	-0.00905	0.01834
1336.5	-0.00309	0.01365
1336	0.00503	-0.00778
1335.5	0.00232	-0.01601
1335	-0.01031	-0.00382
1334.5	-0.02004	0.00683
1334	-0.01782	0.01279
1333.5	-0.00654	0.01371
1333	-0.00348	0.00207
1332.5	-0.00316	-0.00511
1332	0.00568	0.00804
1331.5	0.00721	0.00426
1331	0.00173	-0.00631
1330.5	0.000410148	0.00507
1330	-0.000298785	0.00304
1329.5	-0.00162	-0.00472
1329	-7.89642e-05	-0.00387
1328.5	0.00811	-0.00983
1328	0.00873	-0.00742
1327.5	-0.00639	-0.00461
1327	-0.01931	-0.01582
1326.5	-0.02307	-0.01663
1326	-0.01947	-0.00481
1325.5	-0.02198	-0.000311297
1325	-0.03115	-0.00121
1324.5	-0.03635	-0.01285
1324	-0.04085	-0.03147
1323.5	-0.04678	-0.03737
1323	-0.05351	-0.03215
1322.5	-0.04869	-0.02705
1322	-0.03907	-0.02367
1321.5	-0.03346	-0.01164
1321	-0.02728	-0.00752
1320.5	-0.02548	-0.00796
1320	-0.0255	0.0131
1319.5	-0.00645	0.04076
1319	0.03309	0.0586
1318.5	0.06756	0.05718
1318	0.09466	0.0512
1317.5	0.12577	0.04481
1317	0.15958	0.03117
1316.5	0.18187	0.02856
1316	0.17385	0.02284
1315.5	0.13753	0.01539
1315	0.09964	0.01307
1314.5	0.06911	-0.000821376
1314	0.04281	-0.01452
1313.5	0.01918	-0.00676
1313	-0.00967	0.00197
1312.5	-0.03628	-0.0121
1312	-0.05291	-0.02228
1311.5	-0.05391	-0.02166
1311	-0.04464	-0.0166
1310.5	-0.04298	-0.01195
1310	-0.04714	-0.01377
1309.5	-0.04491	-0.0097
1309	-0.03269	-0.000632682
1308.5	-0.02085	0.00216
1308	-0.01512	-0.00188
1307.5	-0.01674	-0.00465
1307	-0.02496	-0.00695
1306.5	-0.02214	-0.01172
1306	-0.00731	-0.00954
1305.5	0.000943828	-0.00174
1305	0.00663	0.00673
1304.5	0.00826	0.0132
1304	-0.00697	0.00441
1303.5	-0.01282	0.00395
1303	0.00123	0.01213
1302.5	0.00748	0.0019
1302	0.00132	-0.00139
1301.5	-0.01258	-0.00249
1301	-0.021	-0.01103
1300.5	-0.01507	-0.000845065
1300	-0.00209	0.01054
1299.5	0.01161	0.00613
1299	0.01263	0.00197
1298.5	9.02152e-05	-0.00168
1298	-0.0059	-0.00122
1297.5	0.000634901	0.000335286
1297	0.00506	-0.003
1296.5	0.0048	0.00274
1296	0.00635	0.00877
1295.5	-0.000971212	0.0087
1295	-0.00803	0.000226879
1294.5	0.00108	-0.00635
1294	0.000460659	0.0026
1293.5	-0.009	0.00555
1293	-0.01193	0.00254
1292.5	-0.00512	0.00279
1292	0.00564	-0.0068
1291.5	0.0024	-0.01085
1291	-0.00549	-0.000700905
1290.5	-0.01108	5.90981e-05
1290	-0.01025	-0.00108
1289.5	-0.00215	-0.00174
1289	0.000855958	-0.00657
1288.5	0.00259	0.000748551
1288	-0.000823916	0.00972
1287.5	-0.00619	0.0057
1287	-0.00716	-0.00492
1286.5	-0.01222	-0.01434
1286	-0.01303	-0.01263
1285.5	-0.01324	-0.00346
1285	-0.01596	-0.000361404
1284.5	-0.00908	-0.00257
1284	-0.00497	-0.00805
1283.5	-0.00828	-0.01476
1283	-0.00431	-0.0072
1282.5	-0.000229912	-0.00309
1282	-0.00229	-0.00687
1281.5	-0.01239	-0.000676903
1281	-0.01638	0.00751
1280.5	0.00219	0.00531
1280	0.01536	-0.00901
1279.5	0.00199	-0.01167
1279	-0.01341	-0.00605
1278.5	-0.00701	-0.00466
1278	0.00261	0.000700302
1277.5	0.00163	0.00243
1277	-0.000302035	-0.00553
1276.5	0.00177	-0.0107
1276	0.00621	0.00154
1275.5	0.00438	0.01725
1275	-0.00105	0.01522
1274.5	-0.00258	0.00288
1274	0.00733	-0.00695
1273.5	0.01275	-0.00484
1273	0.00286	0.00914
1272.5	-0.00133	0.02182
1272	-0.00116	0.01325
1271.5	0.00283	-0.0075
1271	0.00898	-0.01277
1270.5	0.00621	-0.00876
1270	0.00328	-0.00318
1269.5	0.000965338	0.000200991
1269	-0.0046	0.00784
1268.5	-0.000988767	0.01648
1268	0.00606	0.01447
1267.5	0.00971	0.00669
1267	0.00693	-0.00497
1266.5	-0.00344	-0.01248
1266	-0.00585	-0.00962
1265.5	-0.00257	-0.00126
1265	-0.00304	0.00141
1264.5	-0.00169	0.00798
1264	0.00749	0.02306
1263.5	0.01236	0.02067
1263	0.00423	-0.00604
1262.5	-0.00369	-0.01165
1262	-0.00327	0.0036
1261.5	0.00246	0.0044
1261	0.00487	0.00789
1260.5	0.00583	0.01144
1260	0.00607	5.41141e-05
1259.5	0.0031	-0.01672
1259	-0.00168	-0.01598
1258.5	-0.00698	-0.00121
1258	-0.00352	0.00636
1257.5	0.00029433	0.01766
1257	-0.00188	0.01676
1256.5	-0.000851624	-0.00616
1256	0.0075	-0.01247
1255.5	0.01537	-0.00613
1255	0.00769	-0.00943
1254.5	-0.00467	-0.00643
1254	-0.0033	0.00142
1253.5	-0.00551	0.00588
1253	-0.01027	0.00477
1252.5	-0.00754	0.00152
1252	-0.00734	0.000793436
1251.5	-0.00997	-0.00282
1251	-0.00808	-0.00168
1250.5	0.0053	-0.00438
1250	0.00695	-0.00926
1249.5	-0.00273	-0.00124
1249	-0.00169	0.00911
1248.5	0.000907976	0.01146
1248	0.000697562	-0.00177
1247.5	-0.00268	-0.02278
1247	-0.0113	-0.01978
1246.5	-0.01179	-0.00241
1246	-0.00519	0.00614
1245.5	-0.00435	0.01701
1245	-0.00127	0.02495
1244.5	0.00164	0.01003
1244	-0.00376	-0.00949
1243.5	-0.0087	-0.01493
1243	-0.008	-0.01393
1242.5	0.000277515	-0.00426
1242	0.00604	0.00753
1241.5	-0.00469	0.00519
1241	-0.01857	-0.00376
1240.5	-0.01685	0.0036
1240	-0.00111	0.01391
1239.5	0.00664	-0.000326205
1239	0.00365	-0.01207
1238.5	0.00203	-0.00589
1238	-0.00213	0.00235
1237.5	-0.00302	0.01277
1237	-0.0069	0.00883
1236.5	-0.00806	0.01039
1236	0.0012	0.02032
1235.5	0.000993613	0.00879
1235	0.00139	-0.00894
1234.5	0.00751	-0.02215
1234	0.00949	-0.01619
1233.5	0.00618	-0.00531
1233	-0.00284	-0.01177
1232.5	-0.00863	-0.01457
1232	-0.00111	-0.00155
1231.5	0.00785	0.01424
1231	0.00187	0.00141
1230.5	-0.00477	-0.01942
1230	0.00136	-0.01556
1229.5	0.00969	-0.01223
1229	0.00829	-0.00943
1228.5	0.00291	0.00568
1228	0.00974	0.01646
1227.5	0.01276	0.00661
1227	0.00439	-0.01287
1226.5	0.00423	-0.01914
1226	0.00493	-0.000933511
1225.5	-0.000149738	0.0144
1225	-0.00379	-0.003
1224.5	0.00215	-0.0158
1224	0.01006	-0.0027
1223.5	0.00841	0.0121
1223	0.0027	0.0178
1222.5	-0.00771	0.02006
1222	-0.01836	0.02193
1221.5	-0.01957	0.03317
1221	-0.02539	0.04465
1220.5	-0.03312	0.02804
1220	-0.02301	0.01307
1219.5	0.00175	0.01443
1219	0.02522	0.00346
1218.5	0.03428	-0.02113
1218	0.03424	-0.05117
1217.5	0.03749	-0.06902
1217	0.03658	-0.05584
1216.5	0.02542	-0.02124
1216	0.01279	0.00902
1215.5	0.00584	0.01964
1215	-0.00197	0.0106
1214.5	-0.01221	0.00106
1214	-0.01057	0.00938
1213.5	-0.01186	0.02753
1213	-0.00744	0.02695
1212.5	0.00692	0.00829
1212	0.00536	-0.009
1211.5	-0.00326	-0.0168
1211	-0.00419	0.0012
1210.5	0.00464	0.02851
1210	0.00524	0.02898
1209.5	-0.000371136	0.00439
1209	-0.00331	-0.0025
1208.5	-0.00767	0.000523641
1208	-0.0049	-0.00655
1207.5	0.00106	-0.01004
1207	-0.00241	-0.01051
1206.5	-0.00275	-0.0036
1206	0.00261	0.00669
1205.5	0.00516	0.01129
1205	0.0121	0.0083
1204.5	0.00273	-0.00619
1204	-0.01259	-0.0279
1203.5	-0.01354	-0.02773
1203	-0.01385	-0.01498
1202.5	-0.00371	-0.00502
1202	0.01074	0.00395
1201.5	0.00526	0.00268
1201	-0.01264	0.00359
1200.5	-0.0219	0.00333
1200	-0.01262	-0.00512
1199.5	0.000254205	-0.02215
1199	0.00183	-0.02984
1198.5	-0.00254	-0.01105
1198	-0.00791	0.01323
1197.5	-0.0068	0.03307
1197	-0.00375	0.02747
1196.5	-0.00478	-0.00676
1196	-0.00876	-0.02655
1195.5	-0.01191	-0.02383
1195	-0.00831	-0.01681
1194.5	0.00131	-0.00263
1194	0.00934	0.00251
1193.5	0.0085	-0.00228
1193	0.00358	0.01295
1192.5	-0.00546	0.02454
1192	-0.01394	0.01242
1191.5	-0.01524	-0.00121
1191	-0.00835	-0.00949
1190.5	0.00266	-0.01636
1190	0.00895	-0.01141
1189.5	0.0077	0.00205
1189	-0.00624	0.00621
1188.5	-0.01034	0.00334
1188	-0.00381	-0.00201
1187.5	-0.0092	-0.01201
1187	-0.00652	-0.0234
1186.5	0.00805	-0.01116
1186	0.01336	0.02538
1185.5	0.01209	0.03809
1185	0.01082	0.01299
1184.5	-0.00241	-0.00794
1184	-0.0183	-0.01067
1183.5	-0.01193	-0.0135
1183	0.00187	-0.00172
1182.5	0.00152	0.01464
1182	-0.0009839	0.0134
1181.5	-0.00306	0.00971
1181	-0.00613	0.00478
1180.5	-0.00213	-0.01648
1180	0.00566	-0.03251
1179.5	0.0084	-0.01066
1179	0.00998	0.01458
1178.5	0.00867	0.01229
1178	0.00523	0.000774778
1177.5	0.00207	-0.01264
1177	-0.00298	-0.01414
1176.5	-0.000190566	-9.51212e-06
1176	0.00378	0.01106
1175.5	0.00709	0.01583
1175	0.00575	0.01178
1174.5	-0.00428	-0.00777
1174	-0.0138	-0.02307
1173.5	-0.01724	-0.00754
1173	-0.01113	0.00559
1172.5	0.00228	0.00753
1172	0.01279	0.01489
1171.5	0.00719	0.00428
1171	-0.00467	-0.00019133
1170.5	-0.000101444	0.01428
1170	0.02107	0.01504
1169.5	0.03591	0.00462
1169	0.02585	-0.00759
1168.5	-0.00253	-0.00751
1168	-0.01963	0.00804
1167.5	-0.01846	0.00797
1167	-0.00494	0.00207
1166.5	0.02248	0.00118
1166	0.03335	0.000404013
1165.5	0.02547	0.01011
1165	0.01417	0.00974
1164.5	-0.00434	0.00132
1164	-0.01209	-0.00327
1163.5	-0.00892	-0.00482
1163	-0.00437	0.00146
1162.5	0.00381	-0.0052
1162	0.01024	-0.01831
1161.5	0.00962	-0.01427
1161	-0.000845543	-0.00339
1160.5	-0.01093	0.01277
1160	-0.01344	0.02604
1159.5	-0.00894	0.01394
1159	-0.00246	-0.00506
1158.5	0.000591924	-0.02461
1158	0.000884023	-0.03485
1157.5	-0.000141261	-0.01023
1157	0.00217	0.01536
1156.5	0.0043	0.01461
1156	0.00729	0.00897
1155.5	0.00951	0.01027
1155	0.00134	0.00777
1154.5	-0.01104	-0.00412
1154	-0.02091	-0.01922
1153.5	-0.02371	-0.02577
1153	-0.01308	-0.01461
1152.5	-0.00685	0.000450506
1152	-0.00369	0.00328
1151.5	0.00886	0.00329
1151	0.01236	-0.00576
1150.5	0.00191	-0.01898
1150	-0.00968	-0.01617
1149.5	-0.0096	-0.0024
1149	-0.00592	0.01333
1148.5	-0.00291	0.01414
1148	0.00311	0.01156
1147.5	0.00483	0.02156
1147	-0.00502	0.01805
1146.5	-0.02147	0.00348
1146	-0.01796	-0.00553
1145.5	-0.00166	-0.01867
1145	0.00542	-0.02003
1144.5	0.01275	0.000822735
1144	0.02002	0.00662
1143.5	0.0118	-0.00152
1143	0.00356	0.01319
1142.5	0.00689	0.02012
1142	0.00609	0.01222
1141.5	0.00245	0.01443
1141	0.00374	0.01116
1140.5	-0.00288	0.01248
1140	-0.0117	0.00321
1139.5	0.0019	-0.01373
1139	0.02431	-0.01016
1138.5	0.02726	-0.00621
1138	0.01086	0.00511
1137.5	0.00061118	0.02257
1137	0.00174	0.02449
1136.5	0.00458	0.01466
1136	0.01052	-0.00342
1135.5	0.01527	-0.00613
1135	0.01013	0.00551
1134.5	-0.000356417	-0.00977
1134	-0.00684	-0.02801
1133.5	-0.01392	-0.01905
1133	-0.01041	-0.00116
1132.5	0.00762	0.01307
1132	0.02244	0.01693
1131.5	0.02683	0.00276
1131	0.00996	-0.01153
1130.5	-0.02034	0.000200493
1130	-0.03247	0.01382
1129.5	-0.02818	0.01153
1129	-0.01891	-0.00314
1128.5	-0.000783393	-0.02011
1128	0.01054	-0.02367
1127.5	0.01425	-0.01951
1127	0.01478	-0.0048
1126.5	0.01196	0.01997
1126	0.00674	0.02424
1125.5	-0.00896	0.00707
1125	-0.01993	-0.00939
1124.5	-0.01368	-0.01269
1124	0.00694	0.00777
1123.5	0.02262	0.02318
1123	0.0168	0.01946
1122.5	0.00514	0.01201
1122	-0.00364	-9.76916e-06
1121.5	-0.01198	-0.01379
1121	-0.00829	-0.02005
1120.5	-0.0038	-0.0157
1120	-0.00442	-0.01749
1119.5	0.00889	-0.01207
1119	0.01606	0.01623
1118.5	0.00591	0.02921
1118	-0.00575	0.0182
1117.5	-0.0126	0.00182
1117	-0.01542	-0.00386
1116.5	-0.01326	-0.00247
1116	-0.00556	-0.000826634
1115.5	-0.00178	-0.00325
1115	-0.00161	-0.01609
1114.5	-0.00155	-0.01872
1114	-2.3364e-05	-0.01044
1113.5	0.00204	-0.00238
1113	0.00117	0.00323
1112.5	-0.00197	0.01164
1112	-0.00497	0.01886
1111.5	-0.00739	0.01782
1111	-0.01327	0.007
1110.5	-0.01272	-0.01139
1110	-0.00608	-0.01519
1109.5	-0.01353	-0.01527
1109	-0.02224	-0.01578
1108.5	-0.01826	-0.00441
1108	-0.00227	-0.0012
1107.5	0.02001	-0.00118
1107	0.02955	-0.00134
1106.5	0.02026	-0.00281
1106	-0.00836	-0.000318035
1105.5	-0.0371	0.00211
1105	-0.04273	0.00248
1104.5	-0.02644	0.000553868
1104	-0.00246	0.00548
1103.5	0.01646	0.01002
1103	0.02029	-0.00438
1102.5	0.00961	-0.02215
1102	0.0027	-0.01989
1101.5	0.00523	-0.00863
1101	0.000235631	0.00726
1100.5	-0.0157	0.01604
1100	-0.02386	-0.00437
1099.5	-0.02002	-0.02136
1099	-0.00173	-0.00419
1098.5	0.01415	0.00342
1098	0.00996	-0.0002602
1097.5	0.00299	0.01185
1097	-0.00721	0.01367
1096.5	-0.00863	0.00686
1096	0.01083	0.00413
1095.5	0.01889	-0.00833
1095	0.01134	-0.01727
1094.5	0.00291	0.00125
1094	-0.01088	0.02229
1093.5	-0.02056	0.02122
1093	-0.02022	0.00294
1092.5	-0.00186	-0.02086
1092	0.01998	-0.03755
1091.5	0.02191	-0.03303
1091	0.01745	-0.00687
1090.5	0.00275	0.01365
1090	-0.01265	0.01526
1089.5	-0.01986	0.000690863
1089	-0.01253	-0.01642
1088.5	0.01728	-0.02139
1088	0.0386	-0.00917
1087.5	0.02575	0.02148
1087	-0.01358	0.04451
1086.5	-0.04057	0.04282
1086	-0.02878	0.02459
1085.5	0.00801	-0.00315
1085	0.04022	-0.01344
1084.5	0.04875	0.00424
1084	0.03044	0.0103
1083.5	0.01296	-0.01406
1083	0.00321	-0.03872
1082.5	-0.00896	-0.03866
1082	-0.000680493	-0.01358
1081.5	0.01722	0.03094
1081	0.02173	0.05652
1080.5	0.01052	0.03914
1080	0.000126984	0.01032
1079.5	-0.00501	-0.01553
1079	-0.01487	-0.01807
1078.5	-0.00478	7.85016e-05
1078	0.017	0.00446
1077.5	0.02641	0.000228688
1077	0.02523	-0.00196
1076.5	0.01291	0.01182
1076	0.00466	0.03699
1075.5	-0.000211781	0.03683
1075	-0.01171	-0.00167
1074.5	-0.00919	-0.03391
1074	0.00338	-0.02948
1073.5	0.01325	-0.00872
1073	0.024	0.01705
1072.5	0.02256	0.02841
1072	0.0138	0.02829
1071.5	0.00423	0.0198
1071	-0.01924	0.000119682
1070.5	-0.03343	-0.01079
1070	-0.02724	-0.02673
1069.5	-0.01449	-0.03747
1069	0.00348	-0.02065
1068.5	0.00587	-0.000537653
1068	-0.00147	0.00443
1067.5	-0.00382	0.0019
1067	-0.01099	0.00239
1066.5	-0.01011	0.00416
1066	-0.01023	0.00626
1065.5	-0.00859	0.01865
1065	0.01069	0.02039
1064.5	0.01394	-0.00253
1064	0.000840583	-0.025
1063.5	-0.01055	-0.03856
1063	-0.01539	-0.04079
1062.5	-0.01032	-0.01574
1062	-0.00333	0.02247
1061.5	0.00551	0.03607
1061	0.000797158	0.02143
1060.5	-0.01633	-0.01337
1060	-0.02537	-0.04032
1059.5	-0.02371	-0.03842
1059	-0.01151	-0.01819
1058.5	0.00662	0.00585
1058	0.02293	0.01534
1057.5	0.02846	0.00981
1057	0.01766	-0.00117
1056.5	0.00165	-0.00969
1056	-0.003	-0.01013
1055.5	-0.00263	0.000291016
1055	0.000166447	0.00653
1054.5	0.00675	0.00914
1054	0.00705	0.02233
1053.5	0.00072673	0.014
1053	-0.00471	-0.013
1052.5	-0.00696	-0.01754
1052	-0.00676	-0.00204
1051.5	0.00355	0.01631
1051	0.013	0.01158
1050.5	0.0125	-0.00417
1050	0.00665	-0.00468
1049.5	0.00052165	0.00495
1049	0.00055422	0.000738762
1048.5	0.0046	-0.01909
1048	0.00314	-0.01411
1047.5	-0.00391	0.00127
1047	-0.00148	0.00613
1046.5	0.00307	0.00911
1046	0.00167	0.00629
1045.5	-0.00662	-0.00236
1045	-0.01663	0.00109
1044.5	-0.0172	0.01897
1044	-0.0065	0.01946
1043.5	0.01252	2.05002e-05
1043	0.02368	-0.0173
1042.5	0.0133	-0.01197
1042	-0.00907	0.00244
1041.5	-0.01975	6.45653e-06
1041	-0.01356	-0.00658
1040.5	-0.00946	-0.01721
1040	-0.01389	-0.0305
1039.5	-0.01692	-0.02013
1039	-0.01708	0.01076
1038.5	-0.00731	0.02152
1038	0.00127	0.01476
1037.5	-0.000423456	0.01629
1037	-0.000305965	-0.00364
1036.5	-0.00682	-0.02958
1036	-0.01057	-0.02921
1035.5	-0.01008	-0.02154
1035	-0.01753	-0.0059
1034.5	-0.00933	0.00272
1034	0.00382	-0.00369
1033.5	0.00332	0.00543
1033	-0.00138	0.02227
1032.5	-0.01157	0.01226
1032	-0.0167	-0.00281
1031.5	-0.0074	-0.0018
1031	0.00683	-0.00339
1030.5	0.00843	-0.00427
1030	0.0065	0.00365
1029.5	0.00297	0.00744
1029	-0.01179	0.000858057
1028.5	-0.01645	-0.00356
1028	-0.00818	-0.0019
1027.5	0.00284	0.01182
1027	0.01094	0.03045
1026.5	0.00642	0.0326
1026	-0.00398	0.01067
1025.5	-0.00659	-0.02548
1025	0.00244	-0.03701
1024.5	0.02145	-0.02276
1024	0.03452	-0.00353
1023.5	0.02936	0.01591
1023	0.012	0.01323
1022.5	-0.00731	-0.00706
1022	-0.01932	-0.02013
1021.5	-0.01557	-0.00457
1021	-0.006	0.02035
1020.5	-0.00202	0.02373
1020	0.00651	0.00633
1019.5	0.01577	-0.01668
1019	0.00935	-0.0183
1018.5	-0.00672	0.000511987
1018	-0.01411	0.02972
1017.5	-0.01252	0.04314
1017	-0.00308	0.01934
1016.5	0.0123	-0.0231
1016	0.01229	-0.04419
1015.5	-0.000241981	-0.02146
1015	-0.00213	0.01664
1014.5	0.00472	0.02361
1014	0.01078	-0.00361
1013.5	0.01023	-0.02525
1013	0.00367	-0.02664
1012.5	0.00587	-0.00948
1012	0.01585	0.00755
1011.5	0.01271	0.00952
1011	-0.00612	0.01663
1010.5	-0.02071	0.0186
1010	-0.0181	0.01008
1009.5	-0.00906	0.01218
1009	0.00567	0.01099
1008.5	0.02394	0.00657
1008	0.03043	0.01497
1007.5	0.02283	0.01638
1007	0.00899	-0.001
1006.5	-0.00376	-0.013
1006	-0.01228	-0.01535
1005.5	-0.00862	-0.00512
1005	0.000590126	0.01532
1004.5	0.00148	0.00652
1004	-0.00358	-0.01837
1003.5	-0.00502	-0.02149
1003	-0.00709	-0.00577
1002.5	-0.01023	0.01152
1002	-0.00793	0.01655
1001.5	-0.00243	0.00485
1001	0.00838	-0.00536
1000.5	0.01368	-0.00263
1000	0.00322	-0.00513
999.5	-0.01116	-0.00302
999	-0.01495	0.00153
998.5	-0.00713	-0.00949
998	0.00218	-0.00361
997.5	0.00204	0.00919
997	-0.00622	-0.00437
996.5	-0.01247	-0.02553
996	-0.01639	-0.02858
995.5	-0.01516	-0.0063
995	-0.01078	0.02187
994.5	-0.00844	0.03369
994	-0.0028	0.0212
993.5	-0.000400574	-0.00968
993	-5.89573e-05	-0.02707
992.5	0.00632	-0.01472
992	0.01404	-0.00734
991.5	0.01111	-0.00834
991	-0.00849	-0.00826
990.5	-0.02097	-0.01401
990	-0.01522	-0.01283
989.5	-0.00985	-0.0022
989	-0.00316	0.01583
988.5	-0.00241	0.02882
988	-0.00808	0.02466
987.5	-0.000909423	0.008
987	0.00641	-0.01788
986.5	0.00943	-0.03478
986	0.0094	-0.01765
985.5	-0.000441152	0.00574
985	-0.0082	0.00296
984.5	-0.00569	-0.00188
984	0.00195	0.00356
983.5	0.00296	0.01945
983	0.00497	0.03107
982.5	0.01276	0.01382
982	0.01217	-0.00397
981.5	0.01106	-0.01482
981	0.00629	-0.0226
980.5	-0.00293	-0.01158
980	-0.00454	0.003
979.5	0.000821819	0.01136
979	0.00835	0.00506
978.5	0.00646	-0.00469
978	-0.00105	0.00631
977.5	-0.00237	0.01402
977	-0.00277	0.0096
976.5	-0.00641	0.00787
976	-0.00714	-0.000912227
975.5	-0.00559	-0.01518
975	0.00147	-0.02403
974.5	0.00131	-0.02098
974	-0.01369	-0.00178
973.5	-0.01337	0.02359
973	-0.000207526	0.0292
972.5	0.01009	0.00988
972	0.01106	-0.01284
971.5	-0.00443	-0.01757
971	-0.01313	-0.00676
970.5	2.42332e-05	-0.00205
970	0.01096	-0.000306184
969.5	0.01053	-0.00298
969	0.01012	-0.01351
968.5	-0.00356	-0.01237
968	-0.02393	0.00542
967.5	-0.02703	0.02181
967	-0.01754	0.01223
966.5	-0.00468	-0.00801
966	0.01	-0.01602
965.5	0.01874	-0.01972
965	0.01859	-0.01374
964.5	0.01041	-0.01141
964	-0.0091	-0.00262
963.5	-0.02264	0.02494
963	-0.01928	0.03081
962.5	-0.00568	0.02027
962	0.00931	0.01172
961.5	0.01354	-0.00442
961	0.01123	-0.01658
960.5	0.00613	-0.01456
960	0.00394	-0.0182
959.5	0.00634	-0.01995
959	0.01125	0.00153
958.5	0.0159	0.02105
958	0.00734	0.02462
957.5	-0.00162	0.02133
957	-0.00528	0.00713
956.5	-0.00917	-0.00966
956	-0.00873	-0.02397
955.5	-0.00782	-0.02535
955	-0.00473	0.00193
954.5	0.00186	0.02422
954	0.00763	0.01484
953.5	0.01562	0.00211
953	0.01835	0.01564
952.5	0.00721	0.02435
952	-0.000279844	0.0096
951.5	-0.00327	-0.00526
951	-0.00425	-0.01268
950.5	0.000145868	-0.01652
950	0.0023	-0.0159
949.5	0.006	-0.00263
949	0.01673	0.00838
948.5	0.02362	0.01252
948	0.01807	0.01938
947.5	0.01181	0.02113
947	0.003	0.01016
946.5	-0.01038	-0.00167
946	-0.01628	-0.0166
945.5	-0.0148	-0.03973
945	-0.00548	-0.04274
944.5	-0.000969848	-0.0203
944	-0.00801	0.01077
943.5	0.00171	0.03801
943	0.01358	0.04561
942.5	0.0083	0.02827
942	0.00509	0.00156
941.5	0.00713	-0.01453
941	0.00589	-0.02028
940.5	0.000550313	-0.02118
940	-0.00613	-0.01081
939.5	-0.01311	0.00655
939	-0.0168	0.02217
938.5	-0.01842	0.02321
938	-0.01145	0.00433
937.5	0.00911	-0.01145
937	0.02788	-0.01726
936.5	0.02786	-0.00922
936	0.00672	0.00425
935.5	-0.01331	0.00243
935	-0.01243	-0.00504
934.5	-0.00305	-0.01429
934	0.00307	-0.00695
933.5	0.000154535	0.01332
933	-0.00834	0.00951
932.5	-0.00837	0.00116
932	-0.0045	9.80551e-05
931.5	0.00015247	-0.01377
931	0.00592	-0.013
930.5	0.00021414	0.0082
930	-0.00346	0.0066
929.5	0.00104	-0.00281
929	0.0031	0.00271
928.5	0.0061	0.00636
928	-0.00256	0.00168
927.5	-0.01185	-0.00492
927	-0.00102	-0.00267
926.5	0.01174	0.00928
926	0.00968	0.00979
925.5	-0.000954004	-0.00139
925	-0.00816	-0.00349
924.5	-0.00209	-0.00688
924	0.00291	-0.00344
923.5	0.000631876	0.00747
923	0.00402	0.00619
922.5	0.00661	-0.00347
922	0.00245	-0.0024
921.5	-0.00822	0.0027
921	-0.01381	-0.01197
920.5	-0.00907	-0.01089
920	0.00487	0.01717
919.5	0.01628	0.02254
919	0.00759	-0.00812
918.5	-0.00597	-0.02524
918	-0.00704	-0.007
917.5	0.000201132	0.00622
917	0.00652	0.01232
916.5	0.000746046	0.01291
916	-0.02134	0.00022466
915.5	-0.02237	-0.0084
915	0.00279	-0.00293
914.5	0.02085	0.00675
914	0.03055	-0.0045
913.5	0.02626	-0.01719
913	0.01164	-0.01143
912.5	-0.00556	0.00499
912	-0.0214	0.03417
911.5	-0.0257	0.03764
911	-0.01492	0.00211
910.5	0.0046	-0.02431
910	0.01103	-0.02741
909.5	-0.00409	-0.01353
909	-0.01305	0.0097
908.5	0.00437	0.01558
908	0.01356	0.00597
907.5	0.00761	0.00373
907	0.00542	-0.00453
906.5	-0.000717981	-0.02791
906	1.1782e-05	-0.03464
905.5	0.00443	-0.00614
905	0.00375	0.0331
904.5	-0.000897062	0.05601
904	-0.00572	0.03961
903.5	-0.00433	-0.00324
903	-0.00164	-0.02777
902.5	0.00656	-0.02223
902	0.00762	-0.01019
901.5	-0.00225	-0.0038
901	0.00179	-0.00355
900.5	0.00293	-0.01747
900	-0.01113	-0.01641
899.5	-0.01517	0.00394
899	-0.01058	0.01218
898.5	-0.00768	0.02425
898	0.00648	0.03665
897.5	0.02347	0.02034
897	0.02277	-0.00274
896.5	0.00775	-0.01038
896	-0.00994	-0.01014
895.5	-0.01408	-0.01757
895	-0.0078	-0.02597
894.5	0.000318692	-0.01543
894	-0.000553576	0.00283
893.5	-0.0121	0.01696
893	-0.01599	0.01809
892.5	-0.0092	-0.00289
892	0.01038	-0.01776
891.5	0.02724	-0.0102
891	0.02044	-0.00943
890.5	0.00315	-0.01198
890	-0.0098	0.0036
889.5	-0.02037	0.02003
889	-0.00896	0.01874
888.5	0.02199	0.00749
888	0.02829	0.00649
887.5	0.00927	0.01671
887	-0.0117	0.01157
886.5	-0.01874	-0.00603
886	-0.01144	-0.02707
885.5	0.00289	-0.04921
885	0.01743	-0.02642
884.5	0.01526	0.02263
884	-0.00113	0.03449
883.5	-0.01262	0.0235
883	-0.01587	-0.00485
882.5	-0.01209	-0.04568
882	-0.00181	-0.05032
881.5	0.00366	-0.01569
881	0.00273	0.02577
880.5	0.0027	0.05224
880	0.00815	0.05443
879.5	0.00846	0.02837
879	0.0011	-0.01183
878.5	-0.00178	-0.04625
878	-0.00258	-0.06505
877.5	-0.00909	-0.04349
877	-0.01714	0.01106
876.5	-0.01182	0.0504
876	0.01224	0.05564
875.5	0.02802	0.03021
875	0.01846	-0.004
874.5	-0.00493	-0.01466
874	-0.03516	-0.01253
873.5	-0.04969	-0.01801
873	-0.02876	-0.01529
872.5	0.00588	-0.0042
872	0.02822	0.00728
871.5	0.0327	0.02301
871	0.0201	0.00719
870.5	0.000750788	-0.02477
870	-0.01226	-0.02815
869.5	-0.01489	-0.01785
869	-0.01589	0.01264
868.5	-0.01875	0.03866
868	-0.00989	0.02703
867.5	0.01259	0.01098
867	0.02468	-0.00711
866.5	0.016	-0.03098
866	-0.00173	-0.03936
865.5	-0.01129	-0.00961
865	-0.01241	0.04264
864.5	-0.01331	0.05096
864	-0.00435	0.00626
863.5	0.00891	-0.03753
863	0.01195	-0.05336
862.5	0.0053	-0.04186
862	-0.00422	-0.00933
861.5	-0.0066	0.02557
861	0.00145	0.05591
860.5	0.00261	0.0554
860	0.00134	0.01426
859.5	0.00579	-0.02148
859	0.00319	-0.03554
858.5	-0.0015	-0.03271
858	-0.000865917	-0.02222
857.5	0.00953	-0.01591
857	0.01325	-0.00754
856.5	0.000533148	0.00723
856	-0.01561	0.02452
855.5	-0.01934	0.04058
855	0.00119	0.04834
854.5	0.01836	0.02338
854	0.01158	-0.01905
853.5	-0.00418	-0.04357
853	-0.01564	-0.03918
852.5	-0.00496	-0.00705
852	0.01751	0.02071
851.5	0.0162	0.03031
851	-0.00429	0.01944
850.5	-0.01483	-0.00135
850	-0.00431	-0.00866
849.5	0.00523	-0.01424
849	0.00909	-0.01632
848.5	0.01416	-0.00679
848	0.01093	0.00229
847.5	0.00545	0.01455
847	0.00473	0.02417
846.5	0.00418	0.01199
846	0.0037	-0.01075
845.5	0.00351	-0.02084
845	0.00402	-0.00711
844.5	0.00627	0.01873
844	0.001	0.02824
843.5	-0.00961	0.01221
843	-0.0155	-0.00168
842.5	-0.01766	-0.00356
842	-0.01652	-0.01245
841.5	-0.00498	-0.0312
841	0.00262	-0.04882
840.5	-0.000325363	-0.03997
840	0.00461	0.00712
839.5	0.01033	0.05841
839	0.00532	0.0693
838.5	-0.00932	0.04218
838	-0.01857	0.0017
837.5	-0.00902	-0.02872
837	0.0098	-0.02635
836.5	0.02342	-0.01013
836	0.02324	-0.01465
835.5	0.00976	-0.0292
835	-0.01171	-0.03035
834.5	-0.02807	-0.02184
834	-0.0235	-0.01371
833.5	-0.00317	-0.00288
833	0.01171	0.0171
832.5	0.01422	0.03706
832	0.00428	0.03852
831.5	-0.0073	0.02155
831	-0.0042	0.00993
830.5	-0.00236	0.01245
830	-0.00795	0.01657
829.5	-0.00529	0.00532
829	0.00359	-0.01311
828.5	0.02233	-0.02106
828	0.04532	-0.01842
827.5	0.02535	-0.01398
827	-0.02888	-0.02442
826.5	-0.06275	-0.04486
826	-0.06451	-0.04266
825.5	-0.04218	-0.0091
825	-0.01013	0.02692
824.5	0.0239	0.05419
824	0.04197	0.05001
823.5	0.03491	0.0202
823	0.00614	0.00691
822.5	-0.02616	-0.000381877
822	-0.02852	-0.01883
821.5	-0.00428	-0.03076
821	0.01552	-0.03114
820.5	0.0126	-0.02609
820	0.000864259	-0.0007786
819.5	-0.00791	0.02506
819	-0.02123	0.02587
818.5	-0.0257	0.00374
818	-0.00973	-0.02118
817.5	0.00627	-0.0297
817	0.01498	-0.03359
816.5	0.01167	-0.02687
816	-0.00139	-0.000799208
815.5	0.000817769	0.03868
815	0.01403	0.06759
814.5	0.01727	0.0583
814	0.00654	0.01862
813.5	-0.01006	-0.02888
813	-0.01378	-0.04789
812.5	-0.00288	-0.02495
812	0.00818	-0.00592
811.5	0.0128	-0.01077
811	0.01499	0.00202
810.5	0.02007	0.02346
810	0.01518	0.01421
809.5	-0.000600329	-0.00386
809	-0.00603	-0.00628
808.5	-0.00422	-0.000143264
808	-0.00999	0.01084
807.5	-0.01794	0.02034
807	-0.01152	0.01579
806.5	0.00885	0.01313
806	0.031	0.01552
805.5	0.03901	0.00722
805	0.0212	-0.01185
804.5	-0.00467	-0.03298
804	-0.01918	-0.02347
803.5	-0.01989	0.0129
803	-0.00465	0.02927
802.5	0.01605	0.0143
802	0.01897	0.00228
801.5	0.00562	0.00452
801	-0.01787	0.00356
[truncated: 2 more rows]
