# Supplementary material for: Variable lignin structure revealed inPopulusleaves
Source: Royal Society of Chemistry journal article supplement (doi:10.1039/d3ra03142j), 2023-01-01
Supplement: d3ra03142j2.xlsx [file d3ra03142j2.xlsx]

## Sheet: Sheet3
Principal Component Number	Eigenvalue	Metabolite	PC1 (42.0%)	PC2 (19.8%)	Spectral Names	PC1 (42.0%)	PC2 (19.8%)	Group	Level Names	Outlier	X of Ellipse	Y of Ellipse	Group for Ellipse
Eigenvalues	Eigenvalues	Loadings	Loadings	Loadings	Scores	Scores	Scores	Scores	Scores	Scores	Scores	Scores	Scores
1	48.2617	sucrose	-0.10784	-0.13241	9589-S	1.47721	1.69704	2	N		-52.8203	11.2352	1
2	22.7443	tremuloidin	-0.11073	0.00886	1181-S	1.43616	1.44036	2	S		-52.764	11.4565	1
3	15.2447	salicin	-0.12008	-0.00869	9860-N	3.5876	2.97171	1			-52.7056	11.6774	1
4	9.45298	myo-inositol	-0.10161	-0.07034	1031-N	8.29915	1.87414	1		1031-N	-52.6453	11.8977	1
5	7.02993	quinic acid	0.05918	-0.1493	9953-N	-5.48021	-4.86658	1			-52.5829	12.1175	1
6	4.81094	glucose	0.02741	-0.17793	1121-S	5.2081	1.6789	2			-52.5185	12.3368	1
7	3.13188	trichocarpin	-0.12358	0.03927	856-S	-2.41053	3.55484	2			-52.4521	12.5555	1
8	1.91595	7.10 169 101 68	-0.1027	-0.01233	LILC-26-4-S	-5.15252	-2.63675	2			-52.3837	12.7737	1
9	1.32555	16.09 105 179 268 361 483 573	-0.12834	0.02508	1024-N	1.6372	-11.9327	1		1024-N	-52.3132	12.9913	1
10	1.08206	malic acid	-0.04863	-0.14861	425-N	-15.8646	4.18776	1		425-N	-52.2408	13.2083	1
11	5.02105e-31	shikimic acid	-0.01503	-0.20373	9591-S	7.26245	2.0313	2			-52.1663	13.4247	1
		citric acid	-0.05756	-0.10101							-52.0899	13.6405	1
		2-phenethyl-glucoside	-0.10819	-0.08358							-52.0114	13.8558	1
		11.80 389 491	0.000196279	-0.17688							-51.931	14.0704	1
		catechol	-0.13544	-0.00982							-51.8486	14.2844	1
		fructose	0.02963	-0.18137							-51.7641	14.4978	1
		1,2-cyclohexanediol glucoside	-0.13319	0.00168							-51.6777	14.7105	1
		10.79 397 425 471	-0.09046	-0.12447							-51.5893	14.9226	1
		5-oxo-proline	-0.08723	-0.12884							-51.499	15.1341	1
		10.82 393 257 303	0.01231	-0.18455							-51.4066	15.3449	1
		catechin	0.00249	-0.11729							-51.3123	15.555	1
		a-linolenic acid	-0.06333	-0.04994							-51.216	15.7645	1
		digalactosylglycerol	-0.04255	-0.05944							-51.1178	15.9732	1
		tremulacin	-0.11394	0.08556							-51.0175	16.1813	1
		threonic acid	-0.02308	-0.1944							-50.9154	16.3886	1
		galactose	0.02055	-0.18128							-50.8113	16.5953	1
		10.88 397 425 471	-0.09535	-0.11424							-50.7052	16.8012	1
		salicortin	-0.08642	0.07644							-50.5972	17.0065	1
		monogalactosylglycerol	-0.05116	-0.04361							-50.4872	17.2109	1
		phosphate	0.00588	-0.19346							-50.3753	17.4147	1
		glyceric acid	-0.01457	-0.1938							-50.2615	17.6177	1
		palmitic acid	-0.11611	-0.0811							-50.1458	17.8199	1
		quercetin	-0.09676	0.01938							-50.0281	18.0213	1
		B-sitosterol	-0.13013	-0.04928							-49.9085	18.222	1
		raffinose	-0.03124	-0.18127							-49.7871	18.4219	1
		10.64 397 425 471	-0.0937	-0.12196							-49.6636	18.6211	1
		12.84 235 204 glycoside	-0.10968	-0.07032							-49.5383	18.8194	1
		phenol	-0.1351	0.04807							-49.4111	19.0169	1
		salicyltremuloidin	-0.11561	0.08638							-49.282	19.2136	1
		rutin	0.04114	0.0168							-49.1511	19.4094	1
		salicylic acid	-0.13764	0.05318							-49.0182	19.6045	1
		ribitol	0.04829	-0.16224							-48.8835	19.7987	1
		glycerol	-0.03858	-0.13944							-48.7468	19.9921	1
		2,5-dihydroxybenzoic acid-5-O-glucoside	-0.09688	0.02716							-48.6084	20.1846	1
		succinic acid	-0.05288	-0.17905							-48.468	20.3762	1
		quercetin-3-O-(6'-malonyl)-B-D-glucoside	-0.00404	0.06073							-48.3258	20.567	1
		benzoyl-salicyloylsalicin	-0.11784	0.0771							-48.1818	20.7569	1
		salicyl-salicylic acid-2-O-glucoside	-0.06132	-0.03385							-48.0359	20.9459	1
		salicyl-coumaroyl-glucoside	-0.12353	0.04154							-47.8882	21.1341	1
		2,5-dihydroxybenzoic acid-2-O-glucoside	-0.09357	-0.05888							-47.7386	21.3213	1
		iso-salicin	-0.12814	-0.00697							-47.5872	21.5077	1
		a-salicyloylsalicin	-0.09628	0.07289							-47.434	21.6931	1
		arabitol	0.02152	-0.102							-47.279	21.8776	1
		erythronic acid	-0.01953	-0.15618							-47.1221	22.0612	1
		phenethyltremuloidin	-0.05659	-0.0562							-46.9635	22.2438	1
		15.81 297 guaiacyl lignan	-0.1099	0.09215							-46.8031	22.4255	1
		stearic acid	-0.13484	-0.04821							-46.6409	22.6063	1
		13.81 169 331 263 233 glycoside	-0.12629	-0.01224							-46.4768	22.7861	1
		D-threono-1,4-lactone	-0.10233	-0.12861							-46.3111	22.9649	1
		2,3-dihydroxybenzoic acid-3-O-glucoside	-0.09745	-0.0357							-46.1435	23.1428	1
		vanillyl alcohol 4-O-glucoside	-0.09235	-0.07241							-45.9742	23.3196	1
		2-methoxyhydroquinone-1-O-glucoside	-0.0782	-0.12252							-45.8031	23.4956	1
		salirepin	-0.07361	-0.08196							-45.6303	23.6705	1
		1,2,4-benzenetriol	-0.13858	0.03633							-45.4558	23.8444	1
		catechol glucoside	-0.12141	0.00657							-45.2795	24.0173	1
		xylitol	0.00734	-0.01883							-45.1014	24.1892	1
		salicyl alchohol	-0.12304	0.02343							-44.9217	24.3601	1
		gentisyl alcohol 5-O-glucoside	-0.07497	-0.08307							-44.7402	24.5299	1
		12.36 539 359 sugar	0.05209	-0.06995							-44.557	24.6988	1
		4-O-caffeoyl-quinic acid	-0.00365	-0.00241							-44.3722	24.8665	1
		caffeic acid	-0.13511	-0.01369							-44.1856	25.0333	1
		5-O-caffeoyl-quinic acid	-0.03092	0.02961							-43.9973	25.199	1
		1,2,3-benzenetriol	-0.13229	0.0312							-43.8074	25.3636	1
		maleic acid	-0.1308	0.01987							-43.6158	25.5272	1
		fumaric acid	-0.11076	-0.07058							-43.4226	25.6897	1
		15.95 297 guaiacyl lignan	-0.11314	0.08254							-43.2276	25.8511	1
		14.17 321 105 223 glycoside	-0.10981	0.0294							-43.0311	26.0114	1
		trichocarpinene	-0.12672	0.05519							-42.8329	26.1706	1
		14.90 287 glycoside	-0.12484	0.02004							-42.633	26.3288	1
		14.08 261 glycoside	-0.00797	-0.06185							-42.4315	26.4858	1
		kaempferol	-0.07982	-0.02585							-42.2285	26.6418	1
		15.60 297 guaiacyl lignan	-0.12578	0.05299							-42.0238	26.7966	1
		arbutin	-0.11447	-0.02381							-41.8175	26.9503	1
		vanillyl alcohol 4-O-glucoside	-0.11133	-0.05049							-41.6096	27.1029	1
		19.89 171 307 469 204	-0.13585	0.0376							-41.4001	27.2543	1
		2-methoxyhydroquinone-4-O-glucoside	-0.10475	-0.11486							-41.1891	27.4046	1
		22.94 373 trichocarpin conjugate	-0.13089	0.03942							-40.9765	27.5537	1
		17.90 219 375 597	-0.0274	-0.12269							-40.7623	27.7017	1
		3-O-caffeoyl-quinic acid	-0.06249	0.00713							-40.5466	27.8486	1
		mannitol	0.07139	-0.09157							-40.3293	27.9943	1
		15.91 297 guaiacyl lignan	-0.13455	0.05093							-40.1105	28.1388	1
		epi-catechin	-0.01124	0.06106							-39.8902	28.2821	1
		gallocatechin	0.04946	-0.13406							-39.6683	28.4243	1
		lactic acid	-0.12062	-0.06887							-39.445	28.5652	1
		13.96 261 glycoside	-0.05846	-0.12287							-39.2201	28.705	1
		13.89 261 glycoside	-0.10812	-0.02176							-38.9938	28.8436	1
		17.26 219 171 331	-0.11838	0.01811							-38.766	28.9809	1
		5-hydroxyferulic acid glucoside	-0.09611	0.07747							-38.5367	29.1171	1
		14.21 321 glycoside	-0.00522	-0.1652							-38.306	29.2521	1
		1-hexacosanol	-0.11246	0.08398							-38.0738	29.3858	1
		19.95 557 647 575 590	0.00714	0.00718							-37.8401	29.5183	1
		13.78 157 glycoside	-0.08105	-0.08822							-37.605	29.6496	1
		17.21 219 171 331	-0.11664	0.05967							-37.3685	29.7797	1
		16.39 547 457 flavonoid	-0.10281	-0.00215							-37.1306	29.9085	1
		18.05 219 171 331	-0.11414	0.06683							-36.8913	30.036	1
		14.86 287 glycoside	-0.12014	0.06883							-36.6506	30.1624	1
		18.94 219 91	-0.11541	0.06533							-36.4084	30.2874	1
		18.25 219 171 331	-0.11163	0.05851							-36.1649	30.4112	1
		GABA	-0.05566	-0.11917							-35.9201	30.5338	1
		17.93 219 375 597	-0.0922	0.08752							-35.6739	30.655	1
		18.97 249 171	-0.11862	0.02642							-35.4263	30.775	1
		16.46 547 457 flavonoid	-0.10935	0.06993							-35.1774	30.8938	1
		18.91 307 171	-0.11389	0.06477							-34.9271	31.0112	1
		dihydromyricetin	0.04985	-0.12859							-34.6756	31.1273	1
		isorhamnetin	-0.01132	0.05813							-34.4227	31.2422	1
											-34.1685	31.3558	1
											-33.9131	31.468	1
											-33.6563	31.5789	1
											-33.3983	31.6886	1
											-33.1391	31.7969	1
											-32.8785	31.9039	1
											-32.6168	32.0096	1
											-32.3538	32.1139	1
											-32.0896	32.217	1
											-31.8242	32.3186	1
											-31.5576	32.419	1
											-31.2898	32.518	1
											-31.0208	32.6156	1
											-30.7507	32.712	1
											-30.4794	32.8069	1
											-30.207	32.9005	1
											-29.9334	32.9927	1
											-29.6587	33.0836	1
											-29.3829	33.173	1
											-29.106	33.2612	1
											-28.828	33.3479	1
											-28.549	33.4333	1
											-28.2688	33.5172	1
											-27.9876	33.5998	1
											-27.7054	33.681	1
											-27.4221	33.7608	1
											-27.1378	33.8392	1
											-26.8525	33.9162	1
											-26.5662	33.9918	1
											-26.2789	34.066	1
											-25.9907	34.1388	1
											-25.7014	34.2101	1
											-25.4112	34.2801	1
											-25.1201	34.3486	1
											-24.828	34.4158	1
											-24.535	34.4815	1
											-24.2411	34.5457	1
											-23.9463	34.6086	1
											-23.6507	34.67	1
											-23.3541	34.73	1
											-23.0567	34.7885	1
											-22.7584	34.8456	1
											-22.4593	34.9013	1
											-22.1594	34.9555	1
											-21.8587	35.0083	1
											-21.5571	35.0596	1
											-21.2548	35.1095	1
											-20.9517	35.158	1
											-20.6478	35.2049	1
											-20.3431	35.2505	1
											-20.0377	35.2946	1
											-19.7316	35.3372	1
											-19.4248	35.3783	1
											-19.1173	35.418	1
											-18.809	35.4563	1
											-18.5001	35.493	1
											-18.1905	35.5283	1
											-17.8803	35.5622	1
											-17.5694	35.5945	1
											-17.2579	35.6255	1
											-16.9457	35.6549	1
											-16.633	35.6828	1
											-16.3196	35.7093	1
											-16.0057	35.7343	1
											-15.6912	35.7579	1
											-15.3762	35.7799	1
											-15.0605	35.8005	1
											-14.7444	35.8196	1
											-14.4277	35.8372	1
											-14.1106	35.8534	1
											-13.7929	35.8681	1
											-13.4748	35.8813	1
											-13.1561	35.893	1
											-12.8371	35.9032	1
											-12.5175	35.9119	1
											-12.1976	35.9192	1
											-11.8772	35.925	1
											-11.5564	35.9293	1
											-11.2352	35.9321	1
											-10.9137	35.9334	1
											-10.5917	35.9333	1
											-10.2694	35.9316	1
											-9.9468	35.9285	1
											-9.62383	35.9239	1
											-9.30054	35.9178	1
											-8.97695	35.9103	1
											-8.65306	35.9012	1
											-8.32889	35.8907	1
											-8.00446	35.8787	1
											-7.67977	35.8652	1
											-7.35484	35.8502	1
											-7.02968	35.8338	1
											-6.7043	35.8159	1
											-6.37872	35.7965	1
											-6.05295	35.7756	1
											-5.727	35.7532	1
											-5.40089	35.7294	1
											-5.07463	35.7041	1
											-4.74822	35.6773	1
											-4.42169	35.649	1
											-4.09505	35.6193	1
											-3.76831	35.5881	1
											-3.44148	35.5554	1
											-3.11458	35.5213	1
											-2.78761	35.4857	1
											-2.4606	35.4486	1
											-2.13355	35.4101	1
											-1.80648	35.3701	1
											-1.4794	35.3286	1
											-1.15232	35.2857	1
											-0.82526	35.2414	1
											-0.49823	35.1955	1
											-0.17124	35.1482	1
											0.1557	35.0995	1
											0.48257	35.0493	1
											0.80935	34.9977	1
											1.13604	34.9446	1
											1.46263	34.8901	1
											1.7891	34.8342	1
											2.11543	34.7767	1
											2.44162	34.7179	1
											2.76764	34.6576	1
											3.0935	34.5959	1
											3.41917	34.5328	1
											3.74465	34.4682	1
											4.06992	34.4023	1
											4.39496	34.3349	1
											4.71977	34.266	1
											5.04433	34.1958	1
											5.36862	34.1241	1
											5.69265	34.051	1
											6.01638	33.9766	1
											6.33982	33.9007	1
											6.66294	33.8234	1
											6.98574	33.7447	1
											7.3082	33.6646	1
											7.63031	33.5831	1
											7.95206	33.5003	1
											8.27342	33.416	1
											8.5944	33.3304	1
											8.91498	33.2434	1
											9.23515	33.155	1
											9.55488	33.0652	1
											9.87418	32.9741	1
											10.193	32.8816	1
											10.5114	32.7877	1
											10.8293	32.6925	1
											11.1467	32.5959	1
											11.4636	32.498	1
											11.78	32.3987	1
											12.0959	32.2981	1
											12.4112	32.1962	1
											12.726	32.0929	1
											13.0402	31.9882	1
											13.3538	31.8823	1
											13.6669	31.775	1
											13.9793	31.6664	1
											14.2911	31.5565	1
											14.6023	31.4453	1
											14.9129	31.3328	1
											15.2228	31.219	1
											15.532	31.1039	1
											15.8406	30.9874	1
											16.1484	30.8698	1
											16.4556	30.7508	1
											16.7621	30.6305	1
											17.0678	30.509	1
											17.3728	30.3862	1
											17.6771	30.2621	1
											17.9805	30.1368	1
											18.2832	30.0102	1
											18.5852	29.8824	1
											18.8863	29.7534	1
											19.1866	29.6231	1
											19.4861	29.4915	1
											19.7848	29.3588	1
											20.0826	29.2248	1
											20.3796	29.0896	1
											20.6757	28.9532	1
											20.9709	28.8155	1
											21.2653	28.6767	1
											21.5587	28.5367	1
											21.8512	28.3955	1
											22.1428	28.2531	1
											22.4334	28.1095	1
											22.7231	27.9648	1
											23.0119	27.8188	1
											23.2996	27.6718	1
											23.5864	27.5235	1
											23.8722	27.3742	1
											24.157	27.2236	1
											24.4408	27.072	1
											24.7235	26.9191	1
											25.0052	26.7652	1
											25.2858	26.6102	1
											25.5654	26.454	1
											25.8439	26.2968	1
											26.1213	26.1384	1
											26.3977	25.9789	1
											26.6729	25.8184	1
											26.947	25.6567	1
											27.22	25.494	1
											27.4918	25.3302	1
											27.7625	25.1654	1
											28.0321	24.9995	1
											28.3004	24.8325	1
											28.5676	24.6645	1
											28.8336	24.4955	1
											29.0984	24.3255	1
											29.3619	24.1544	1
											29.6243	23.9823	1
											29.8854	23.8091	1
											30.1453	23.635	1
											30.4039	23.4599	1
											30.6612	23.2838	1
											30.9173	23.1067	1
											31.1721	22.9287	1
											31.4256	22.7496	1
											31.6778	22.5696	1
											31.9287	22.3887	1
											32.1782	22.2068	1
											32.4264	22.024	1
											32.6733	21.8402	1
											32.9188	21.6555	1
											33.163	21.4699	1
											33.4058	21.2834	1
											33.6472	21.096	1
											33.8872	20.9076	1
											34.1258	20.7184	1
											34.363	20.5283	1
											34.5987	20.3374	1
											34.8331	20.1456	1
											35.066	19.9529	1
											35.2974	19.7593	1
											35.5274	19.5649	1
											35.7559	19.3697	1
											35.983	19.1737	1
											36.2086	18.9768	1
											36.4326	18.7792	1
											36.6552	18.5807	1
											36.8762	18.3814	1
											37.0958	18.1813	1
											37.3138	17.9805	1
											37.5302	17.7789	1
											37.7452	17.5765	1
											37.9585	17.3733	1
											38.1703	17.1695	1
											38.3805	16.9648	1
											38.5892	16.7595	1
											38.7963	16.5534	1
											39.0017	16.3466	1
											39.2056	16.1391	1
											39.4078	15.9309	1
											39.6085	15.722	1
											39.8075	15.5124	1
											40.0048	15.3021	1
											40.2005	15.0912	1
											40.3946	14.8796	1
											40.587	14.6674	1
											40.7777	14.4545	1
											40.9668	14.241	1
											41.1542	14.0269	1
											41.3399	13.8121	1
											41.5239	13.5968	1
											41.7062	13.3808	1
											41.8867	13.1642	1
											42.0656	12.9471	1
											42.2427	12.7294	1
											42.4181	12.5111	1
											42.5918	12.2923	1
											42.7637	12.0729	1
											42.9338	11.853	1
											43.1022	11.6326	1
											43.2689	11.4116	1
											43.4337	11.1901	1
											43.5968	10.9682	1
											43.7581	10.7457	1
											43.9176	10.5227	1
											44.0753	10.2993	1
											44.2312	10.0754	1
											44.3853	9.851	1
											44.5376	9.62618	1
											44.688	9.40092	1
											44.8366	9.17522	1
											44.9834	8.9491	1
											45.1283	8.72257	1
											45.2714	8.49563	1
											45.4126	8.26829	1
											45.552	8.04056	1
											45.6895	7.81245	1
											45.8252	7.58397	1
											45.959	7.35513	1
											46.0909	7.12594	1
											46.2208	6.8964	1
											46.349	6.66653	1
											46.4752	6.43634	1
											46.5995	6.20583	1
											46.7219	5.97501	1
											46.8424	5.74389	1
											46.961	5.51249	1
											47.0777	5.28081	1
											47.1924	5.04885	1
											47.3052	4.81664	1
											47.4161	4.58417	1
											47.5251	4.35146	1
											47.6321	4.11852	1
											47.7371	3.88535	1
											47.8402	3.65196	1
											47.9414	3.41838	1
											48.0406	3.18459	1
											48.1378	2.95062	1
											48.2331	2.71647	1
											48.3264	2.48215	1
											48.4177	2.24767	1
											48.5071	2.01304	1
											48.5944	1.77826	1
											48.6798	1.54336	1
											48.7632	1.30834	1
											48.8446	1.0732	1
											48.924	0.83795	1
											49.0014	0.60262	1
											49.0768	0.3672	1
											49.1502	0.1317	1
											49.2216	-0.10387	1
											49.291	-0.33949	1
											49.3584	-0.57516	1
											49.4238	-0.81087	1
											49.4871	-1.04661	1
											49.5485	-1.28237	1
											49.6078	-1.51814	1
											49.6651	-1.75391	1
											49.7203	-1.98967	1
											49.7736	-2.22541	1
											49.8248	-2.46113	1
											49.8739	-2.69682	1
											49.9211	-2.93245	1
											49.9661	-3.16804	1
											50.0092	-3.40356	1
											50.0502	-3.639	1
											50.0892	-3.87437	1
											50.1261	-4.10964	1
											50.161	-4.34481	1
											50.1938	-4.57987	1
											50.2246	-4.81481	1
											50.2534	-5.04962	1
											50.2801	-5.28429	1
											50.3047	-5.51882	1
											50.3273	-5.75319	1
											50.3479	-5.98739	1
											50.3663	-6.22142	1
											50.3828	-6.45526	1
											50.3972	-6.68891	1
											50.4095	-6.92235	1
											50.4197	-7.15558	1
											50.428	-7.3886	1
											50.4341	-7.62138	1
											50.4382	-7.85392	1
											50.4402	-8.08621	1
											50.4402	-8.31824	1
											50.4381	-8.55	1
											50.434	-8.78149	1
											50.4278	-9.0127	1
											50.4196	-9.2436	1
											50.4093	-9.47421	1
											50.3969	-9.7045	1
											50.3825	-9.93446	1
											50.366	-10.1641	1
											50.3475	-10.3934	1
											50.3269	-10.6223	1
											50.3043	-10.8509	1
											50.2796	-11.0791	1
											50.2529	-11.307	1
											50.2241	-11.5344	1
											50.1933	-11.7615	1
											50.1604	-11.9882	1
											50.1255	-12.2144	1
											50.0885	-12.4402	1
											50.0495	-12.6656	1
											50.0084	-12.8906	1
											49.9653	-13.1151	1
											49.9202	-13.3391	1
											49.873	-13.5627	1
											49.8238	-13.7858	1
											49.7726	-14.0084	1
											49.7193	-14.2306	1
											49.664	-14.4522	1
											49.6067	-14.6733	1
											49.5474	-14.8939	1
											49.486	-15.114	1
											49.4226	-15.3335	1
											49.3572	-15.5525	1
											49.2898	-15.7709	1
											49.2204	-15.9888	1
											49.1489	-16.2061	1
											49.0755	-16.4228	1
											49	-16.639	1
											48.9226	-16.8545	1
											48.8431	-17.0694	1
											48.7617	-17.2838	1
											48.6782	-17.4975	1
											48.5928	-17.7105	1
											48.5054	-17.9229	1
											48.416	-18.1347	1
											48.3247	-18.3458	1
											48.2314	-18.5563	1
											48.1361	-18.7661	1
											48.0388	-18.9752	1
											47.9396	-19.1836	1
											47.8384	-19.3913	1
											47.7352	-19.5983	1
											47.6301	-19.8046	1
											47.5231	-20.0102	1
											47.4141	-20.2151	1
											47.3032	-20.4192	1
											47.1903	-20.6225	1
											47.0755	-20.8251	1
											46.9588	-21.027	1
											46.8402	-21.2281	1
											46.7197	-21.4284	1
											46.5972	-21.6279	1
											46.4729	-21.8266	1
											46.3466	-22.0245	1
											46.2185	-22.2216	1
											46.0884	-22.4179	1
											45.9565	-22.6134	1
											45.8227	-22.808	1
											45.687	-23.0018	1
											45.5495	-23.1947	1
											45.4101	-23.3868	1
											45.2688	-23.578	1
											45.1257	-23.7684	1
											44.9807	-23.9578	1
											44.8339	-24.1464	1
											44.6853	-24.3341	1
											44.5348	-24.5209	1
											44.3825	-24.7068	1
											44.2284	-24.8917	1
											44.0724	-25.0758	1
											43.9147	-25.2589	1
											43.7552	-25.4411	1
											43.5938	-25.6223	1
											43.4307	-25.8026	1
											43.2658	-25.9819	1
											43.0992	-26.1602	1
											42.9307	-26.3376	1
											42.7606	-26.514	1
											42.5886	-26.6894	1
											42.4149	-26.8638	1
											42.2395	-27.0372	1
											42.0623	-27.2096	1
											41.8834	-27.381	1
											41.7028	-27.5514	1
											41.5205	-27.7207	1
											41.3365	-27.8891	1
											41.1508	-28.0563	1
											40.9633	-28.2225	1
											40.7743	-28.3877	1
											40.5835	-28.5518	1
											40.391	-28.7148	1
											40.197	-28.8768	1
											40.0012	-29.0376	1
											39.8038	-29.1974	1
											39.6048	-29.3561	1
											39.4041	-29.5137	1
											39.2019	-29.6702	1
											38.998	-29.8256	1
											38.7925	-29.9798	1
											38.5854	-30.133	1
											38.3767	-30.285	1
											38.1664	-30.4358	1
											37.9546	-30.5856	1
											37.7412	-30.7341	1
											37.5263	-30.8816	1
											37.3098	-31.0278	1
											37.0917	-31.1729	1
											36.8722	-31.3168	1
											36.6511	-31.4596	1
											36.4285	-31.6012	1
											36.2044	-31.7415	1
											35.9788	-31.8807	1
											35.7518	-32.0187	1
											35.5232	-32.1555	1
											35.2932	-32.291	1
											35.0617	-32.4254	1
											34.8288	-32.5585	1
											34.5944	-32.6904	1
											34.3586	-32.8211	1
											34.1214	-32.9505	1
											33.8828	-33.0787	1
											33.6427	-33.2056	1
											33.4013	-33.3313	1
											33.1585	-33.4558	1
											32.9143	-33.5789	1
											32.6688	-33.7009	1
											32.4219	-33.8215	1
											32.1737	-33.9408	1
											31.9241	-34.0589	1
											31.6732	-34.1757	1
											31.421	-34.2912	1
											31.1674	-34.4054	1
											30.9126	-34.5183	1
											30.6565	-34.6299	1
											30.3991	-34.7402	1
											30.1405	-34.8492	1
											29.8806	-34.9569	1
											29.6195	-35.0632	1
											29.3571	-35.1682	1
											29.0935	-35.2719	1
											28.8287	-35.3743	1
											28.5627	-35.4753	1
											28.2955	-35.5749	1
											28.0271	-35.6733	1
											27.7576	-35.7702	1
											27.4868	-35.8659	1
											27.215	-35.9601	1
											26.942	-36.053	1
											26.6679	-36.1446	1
											26.3926	-36.2347	1
											26.1163	-36.3235	1
											25.8388	-36.411	1
											25.5603	-36.497	1
											25.2807	-36.5817	1
											25	-36.665	1
											24.7183	-36.7469	1
											24.4355	-36.8274	1
											24.1518	-36.9064	1
											23.867	-36.9841	1
											23.5812	-37.0605	1
											23.2944	-37.1354	1
											23.0066	-37.2088	1
											22.7178	-37.2809	1
											22.4281	-37.3516	1
											22.1374	-37.4208	1
											21.8458	-37.4887	1
											21.5533	-37.5551	1
											21.2599	-37.6201	1
											20.9655	-37.6836	1
											20.6703	-37.7458	1
											20.3742	-37.8064	1
											20.0772	-37.8657	1
											19.7793	-37.9235	1
											19.4806	-37.9799	1
											19.1811	-38.0349	1
											18.8808	-38.0884	1
											18.5796	-38.1404	1
											18.2777	-38.191	1
											17.975	-38.2402	1
											17.6715	-38.2879	1
											17.3672	-38.3342	1
											17.0622	-38.379	1
											16.7564	-38.4223	1
											16.45	-38.4642	1
											16.1428	-38.5046	1
											15.8349	-38.5436	1
											15.5263	-38.5811	1
											15.2171	-38.6172	1
											14.9071	-38.6517	1
											14.5966	-38.6848	1
											14.2854	-38.7165	1
											13.9735	-38.7466	1
											13.6611	-38.7753	1
											13.3481	-38.8025	1
											13.0344	-38.8283	1
											12.7202	-38.8526	1
											12.4054	-38.8754	1
											12.0901	-38.8967	1
											11.7742	-38.9165	1
											11.4578	-38.9349	1
											11.1409	-38.9518	1
											10.8235	-38.9672	1
											10.5055	-38.9811	1
											10.1872	-38.9936	1
											9.86831	-39.0045	1
											9.54901	-39.014	1
											9.22926	-39.022	1
											8.90909	-39.0286	1
											8.58851	-39.0336	1
											8.26752	-39.0371	1
											7.94614	-39.0392	1
											7.62439	-39.0398	1
											7.30228	-39.0389	1
											6.97981	-39.0365	1
											6.65701	-39.0327	1
											6.33388	-39.0273	1
											6.01043	-39.0205	1
											5.68669	-39.0122	1
											5.36266	-39.0024	1
											5.03836	-38.9912	1
											4.7138	-38.9784	1
											4.38899	-38.9642	1
											4.06394	-38.9485	1
											3.73867	-38.9313	1
											3.41319	-38.9126	1
											3.08751	-38.8925	1
											2.76165	-38.8708	1
											2.43562	-38.8477	1
											2.10943	-38.8232	1
											1.78309	-38.7971	1
											1.45663	-38.7696	1
											1.13004	-38.7406	1
											0.80335	-38.7102	1
											0.47656	-38.6782	1
											0.14969	-38.6448	1
											-0.17725	-38.6099	1
											-0.50424	-38.5736	1
											-0.83127	-38.5358	1
											-1.15833	-38.4965	1
											-1.48541	-38.4558	1
											-1.81249	-38.4136	1
											-2.13956	-38.37	1
											-2.46661	-38.3249	1
											-2.79362	-38.2784	1
											-3.12059	-38.2303	1
											-3.44749	-38.1809	1
											-3.77432	-38.13	1
											-4.10106	-38.0776	1
											-4.4277	-38.0238	1
											-4.75422	-37.9686	1
											-5.08063	-37.9119	1
											-5.40689	-37.8538	1
											-5.733	-37.7942	1
											-6.05894	-37.7332	1
											-6.38471	-37.6708	1
											-6.71028	-37.607	1
											-7.03566	-37.5417	1
											-7.36081	-37.475	1
											-7.68574	-37.4069	1
											-8.01043	-37.3374	1
											-8.33486	-37.2664	1
											-8.65902	-37.194	1
											-8.9829	-37.1202	1
											-9.30649	-37.0451	1
											-9.62977	-36.9685	1
											-9.95273	-36.8905	1
											-10.2754	-36.8111	1
											-10.5976	-36.7303	1
											-10.9196	-36.6482	1
											-11.2411	-36.5646	1
											-11.5623	-36.4797	1
											-11.8831	-36.3933	1
											-12.2035	-36.3056	1
											-12.5234	-36.2165	1
											-12.8429	-36.1261	1
											-13.162	-36.0343	1
											-13.4806	-35.9411	1
											-13.7988	-35.8466	1
											-14.1164	-35.7507	1
											-14.4336	-35.6534	1
											-14.7502	-35.5548	1
											-15.0664	-35.4549	1
											-15.382	-35.3536	1
											-15.697	-35.251	1
											-16.0115	-35.147	1
											-16.3254	-35.0417	1
											-16.6388	-34.9351	1
											-16.9515	-34.8272	1
											-17.2636	-34.7179	1
											-17.5751	-34.6074	1
											-17.886	-34.4955	1
											-18.1962	-34.3823	1
											-18.5058	-34.2679	1
											-18.8147	-34.1521	1
											-19.1229	-34.035	1
											-19.4305	-33.9167	1
											-19.7373	-33.7971	1
											-20.0434	-33.6762	1
											-20.3487	-33.554	1
											-20.6534	-33.4306	1
											-20.9572	-33.3059	1
											-21.2603	-33.18	1
											-21.5627	-33.0528	1
											-21.8642	-32.9243	1
											-22.1649	-32.7946	1
											-22.4648	-32.6637	1
											-22.7639	-32.5316	1
											-23.0622	-32.3982	1
											-23.3596	-32.2636	1
											-23.6561	-32.1278	1
											-23.9518	-31.9908	1
											-24.2465	-31.8525	1
											-24.5404	-31.7131	1
											-24.8334	-31.5725	1
											-25.1255	-31.4307	1
											-25.4166	-31.2877	1
											-25.7067	-31.1436	1
											-25.996	-30.9982	1
											-26.2842	-30.8517	1
											-26.5715	-30.7041	1
											-26.8578	-30.5553	1
											-27.1431	-30.4053	1
											-27.4274	-30.2542	1
											-27.7106	-30.102	1
											-27.9928	-29.9486	1
											-28.274	-29.7941	1
											-28.5541	-29.6385	1
											-28.8331	-29.4818	1
											-29.1111	-29.324	1
											-29.388	-29.1651	1
											-29.6638	-29.0051	1
											-29.9384	-28.844	1
											-30.212	-28.6818	1
											-30.4844	-28.5186	1
											-30.7557	-28.3542	1
											-31.0258	-28.1889	1
											-31.2947	-28.0224	1
											-31.5625	-27.8549	1
											-31.8291	-27.6864	1
											-32.0945	-27.5169	1
											-32.3586	-27.3463	1
											-32.6216	-27.1747	1
											-32.8833	-27.0021	1
											-33.1438	-26.8285	1
											-33.4031	-26.6539	1
											-33.6611	-26.4783	1
											-33.9178	-26.3017	1
											-34.1732	-26.1241	1
											-34.4274	-25.9455	1
											-34.6802	-25.766	1
											-34.9317	-25.5856	1
											-35.182	-25.4041	1
											-35.4308	-25.2218	1
											-35.6784	-25.0385	1
											-35.9246	-24.8543	1
											-36.1694	-24.6691	1
											-36.4129	-24.483	1
											-36.655	-24.2961	1
											-36.8957	-24.1082	1
											-37.135	-23.9194	1
											-37.3729	-23.7298	1
											-37.6094	-23.5392	1
											-37.8444	-23.3479	1
											-38.078	-23.1556	1
											-38.3102	-22.9625	1
											-38.5409	-22.7685	1
											-38.7702	-22.5737	1
											-38.998	-22.3781	1
											-39.2243	-22.1816	1
											-39.4491	-21.9844	1
											-39.6724	-21.7863	1
											-39.8942	-21.5874	1
											-40.1145	-21.3877	1
											-40.3333	-21.1873	1
											-40.5505	-20.986	1
											-40.7662	-20.7841	1
											-40.9804	-20.5813	1
											-41.193	-20.3778	1
											-41.404	-20.1735	1
											-41.6134	-19.9685	1
											-41.8213	-19.7628	1
											-42.0275	-19.5563	1
											-42.2322	-19.3492	1
											-42.4353	-19.1413	1
											-42.6367	-18.9328	1
											-42.8365	-18.7235	1
											-43.0347	-18.5136	1
											-43.2312	-18.303	1
											-43.4261	-18.0918	1
											-43.6194	-17.8799	1
											-43.8109	-17.6673	1
											-44.0008	-17.4541	1
											-44.1891	-17.2403	1
											-44.3756	-17.0258	1
											-44.5604	-16.8108	1
											-44.7436	-16.5951	1
											-44.925	-16.3789	1
											-45.1047	-16.162	1
											-45.2827	-15.9446	1
											-45.459	-15.7266	1
											-45.6335	-15.5081	1
											-45.8063	-15.289	1
											-45.9773	-15.0693	1
											-46.1466	-14.8491	1
											-46.3141	-14.6284	1
											-46.4799	-14.4072	1
											-46.6439	-14.1855	1
											-46.806	-13.9633	1
											-46.9664	-13.7405	1
											-47.125	-13.5173	1
											-47.2818	-13.2937	1
											-47.4368	-13.0695	1
											-47.59	-12.8449	1
											-47.7413	-12.6199	1
											-47.8909	-12.3944	1
											-48.0386	-12.1685	1
											-48.1844	-11.9422	1
											-48.3284	-11.7154	1
											-48.4706	-11.4883	1
											-48.6109	-11.2607	1
											-48.7494	-11.0328	1
											-48.8859	-10.8045	1
											-49.0207	-10.5759	1
											-49.1535	-10.3469	1
											-49.2844	-10.1175	1
											-49.4135	-9.88779	1
											-49.5407	-9.65775	1
											-49.6659	-9.4274	1
											-49.7893	-9.19673	1
											-49.9108	-8.96577	1
											-50.0303	-8.7345	1
											-50.1479	-8.50296	1
											-50.2636	-8.27114	1
											-50.3774	-8.03905	1
											-50.4893	-7.80671	1
											-50.5992	-7.57412	1
											-50.7072	-7.34129	1
											-50.8132	-7.10824	1
											-50.9173	-6.87496	1
											-51.0194	-6.64147	1
											-51.1196	-6.40778	1
											-51.2178	-6.1739	1
											-51.3141	-5.93984	1
											-51.4083	-5.7056	1
											-51.5006	-5.4712	1
											-51.591	-5.23665	1
											-51.6793	-5.00194	1
											-51.7657	-4.76711	1
											-51.8501	-4.53214	1
											-51.9325	-4.29706	1
											-52.0129	-4.06187	1
											-52.0913	-3.82657	1
											-52.1677	-3.59119	1
											-52.2421	-3.35573	1
											-52.3145	-3.1202	1
											-52.3849	-2.8846	1
											-52.4533	-2.64896	1
											-52.5197	-2.41327	1
											-52.5841	-2.17754	1
											-52.6464	-1.94179	1
											-52.7067	-1.70603	1
											-52.765	-1.47026	1
											-52.8213	-1.23449	1
											-52.8755	-0.99873	1
											-52.9278	-0.763	1
											-52.9779	-0.5273	1
											-53.0261	-0.29164	1
											-53.0722	-0.05602	1
											-53.1163	0.17953	1
											-53.1583	0.41501	1
											-53.1983	0.65042	1
											-53.2363	0.88574	1
											-53.2722	1.12096	1
											-53.306	1.35607	1
											-53.3379	1.59108	1
											-53.3676	1.82595	1
											-53.3953	2.0607	1
											-53.421	2.2953	1
											-53.4446	2.52975	1
											-53.4662	2.76403	1
											-53.4857	2.99815	1
											-53.5032	3.23208	1
											-53.5186	3.46583	1
											-53.5319	3.69938	1
											-53.5432	3.93272	1
											-53.5525	4.16584	1
											-53.5596	4.39874	1
											-53.5647	4.6314	1
											-53.5678	4.86382	1
											-53.5688	5.09598	1
											-53.5678	5.32788	1
											-53.5647	5.55951	1
											-53.5595	5.79085	1
											-53.5523	6.02191	1
											-53.543	6.25267	1
											-53.5317	6.48311	1
											-53.5183	6.71324	1
											-53.5029	6.94305	1
											-53.4854	7.17251	1
											-53.4658	7.40163	1
											-53.4442	7.6304	1
											-53.4205	7.8588	1
											-53.3948	8.08684	1
											-53.3671	8.31449	1
											-53.3373	8.54175	1
											-53.3054	8.76861	1
											-53.2715	8.99506	1
											-53.2356	9.22109	1
											-53.1976	9.4467	1
											-53.1576	9.67188	1
											-53.1155	9.89661	1
											-53.0714	10.1209	1
											-53.0252	10.3447	1
											-52.977	10.568	1
											-52.9268	10.7909	1
											-52.8746	11.0133	1
											-52.8203	11.2352	1
											--	--	--
											-19.3531	-3.93863	2
											-19.365	-3.89003	2
											-19.376	-3.84122	2
											-19.3863	-3.79221	2
											-19.3957	-3.743	2
											-19.4043	-3.69359	2
											-19.4121	-3.64399	2
											-19.419	-3.59419	2
											-19.4252	-3.54419	2
											-19.4305	-3.494	2
											-19.435	-3.44363	2
											-19.4387	-3.39306	2
											-19.4416	-3.34232	2
											-19.4436	-3.29138	2
											-19.4448	-3.24027	2
											-19.4453	-3.18898	2
											-19.4448	-3.13751	2
											-19.4436	-3.08586	2
											-19.4415	-3.03404	2
											-19.4386	-2.98205	2
											-19.435	-2.92989	2
											-19.4304	-2.87757	2
											-19.4251	-2.82507	2
											-19.4189	-2.77242	2
											-19.412	-2.7196	2
											-19.4042	-2.66663	2
											-19.3955	-2.6135	2
											-19.3861	-2.56021	2
											-19.3758	-2.50678	2
											-19.3648	-2.45319	2
											-19.3529	-2.39945	2
											-19.3402	-2.34557	2
											-19.3266	-2.29154	2
											-19.3123	-2.23737	2
											-19.2971	-2.18307	2
											-19.2812	-2.12862	2
											-19.2644	-2.07404	2
											-19.2468	-2.01932	2
											-19.2284	-1.96448	2
											-19.2091	-1.90951	2
											-19.1891	-1.8544	2
											-19.1683	-1.79918	2
											-19.1466	-1.74383	2
											-19.1241	-1.68836	2
											-19.1009	-1.63278	2
											-19.0768	-1.57707	2
											-19.0519	-1.52126	2
											-19.0262	-1.46533	2
											-18.9997	-1.4093	2
											-18.9724	-1.35315	2
											-18.9443	-1.29691	2
											-18.9154	-1.24056	2
											-18.8857	-1.18411	2
											-18.8552	-1.12756	2
											-18.8239	-1.07091	2
											-18.7918	-1.01417	2
											-18.7589	-0.95735	2
											-18.7252	-0.90043	2
											-18.6907	-0.84342	2
											-18.6555	-0.78633	2
											-18.6194	-0.72916	2
											-18.5826	-0.67191	2
											-18.5449	-0.61458	2
											-18.5065	-0.55717	2
											-18.4673	-0.4997	2
											-18.4273	-0.44215	2
											-18.3866	-0.38453	2
											-18.345	-0.32684	2
											-18.3027	-0.26909	2
											-18.2596	-0.21128	2
											-18.2158	-0.15341	2
											-18.1711	-0.09549	2
											-18.1257	-0.0375	2
											-18.0795	0.02053	2
											-18.0326	0.07862	2
											-17.9849	0.13675	2
											-17.9364	0.19493	2
											-17.8872	0.25315	2
											-17.8372	0.31142	2
											-17.7864	0.36972	2
											-17.7349	0.42806	2
											-17.6826	0.48643	2
											-17.6296	0.54484	2
											-17.5759	0.60327	2
											-17.5214	0.66173	2
											-17.4661	0.72022	2
											-17.4101	0.77873	2
											-17.3534	0.83726	2
											-17.2959	0.89581	2
											-17.2377	0.95438	2
											-17.1788	1.01295	2
											-17.1191	1.07154	2
											-17.0587	1.13014	2
											-16.9976	1.18875	2
											-16.9357	1.24735	2
											-16.8732	1.30596	2
											-16.8099	1.36457	2
											-16.7459	1.42318	2
											-16.6811	1.48178	2
											-16.6157	1.54038	2
											-16.5496	1.59896	2
											-16.4827	1.65754	2
											-16.4152	1.7161	2
											-16.3469	1.77464	2
											-16.278	1.83316	2
											-16.2083	1.89166	2
											-16.138	1.95014	2
											-16.0669	2.00859	2
											-15.9952	2.06702	2
											-15.9228	2.12541	2
											-15.8498	2.18377	2
											-15.776	2.24209	2
											-15.7015	2.30038	2
											-15.6264	2.35863	2
											-15.5507	2.41683	2
											-15.4742	2.475	2
											-15.3971	2.53311	2
											-15.3193	2.59118	2
											-15.2409	2.64919	2
											-15.1618	2.70715	2
											-15.0821	2.76506	2
											-15.0017	2.8229	2
											-14.9207	2.88069	2
											-14.839	2.93841	2
											-14.7567	2.99607	2
											-14.6738	3.05366	2
											-14.5902	3.11118	2
											-14.506	3.16863	2
											-14.4212	3.22601	2
											-14.3357	3.28331	2
											-14.2497	3.34053	2
											-14.163	3.39767	2
											-14.0757	3.45472	2
											-13.9878	3.51169	2
											-13.8993	3.56858	2
											-13.8102	3.62537	2
											-13.7204	3.68207	2
											-13.6301	3.73868	2
											-13.5392	3.79519	2
											-13.4478	3.8516	2
											-13.3557	3.90791	2
											-13.2631	3.96411	2
											-13.1698	4.02021	2
											-13.0761	4.07621	2
											-12.9817	4.13209	2
											-12.8868	4.18786	2
											-12.7913	4.24351	2
											-12.6952	4.29905	2
											-12.5986	4.35447	2
											-12.5015	4.40977	2
											-12.4038	4.46495	2
											-12.3056	4.52	2
											-12.2068	4.57492	2
											-12.1075	4.62972	2
											-12.0076	4.68438	2
											-11.9072	4.73891	2
											-11.8064	4.7933	2
											-11.705	4.84755	2
											-11.603	4.90166	2
											-11.5006	4.95563	2
											-11.3977	5.00946	2
											-11.2942	5.06313	2
											-11.1903	5.11666	2
											-11.0858	5.17004	2
											-10.9809	5.22326	2
											-10.8755	5.27633	2
											-10.7696	5.32924	2
											-10.6632	5.38199	2
											-10.5564	5.43458	2
											-10.4491	5.48701	2
											-10.3413	5.53927	2
											-10.2331	5.59136	2
											-10.1244	5.64328	2
											-10.0152	5.69503	2
											-9.90564	5.74661	2
											-9.7956	5.79801	2
											-9.68512	5.84923	2
											-9.57421	5.90027	2
											-9.46287	5.95113	2
											-9.3511	6.00181	2
											-9.23891	6.0523	2
											-9.12631	6.1026	2
											-9.01329	6.15271	2
											-8.89986	6.20263	2
											-8.78603	6.25235	2
											-8.6718	6.30188	2
											-8.55718	6.35121	2
											-8.44217	6.40034	2
											-8.32677	6.44927	2
											-8.21099	6.49799	2
											-8.09483	6.54651	2
											-7.9783	6.59482	2
											-7.8614	6.64292	2
											-7.74415	6.69081	2
											-7.62653	6.73849	2
											-7.50856	6.78595	2
											-7.39024	6.83319	2
											-7.27158	6.88021	2
											-7.15258	6.92702	2
											-7.03324	6.9736	2
											-6.91358	7.01995	2
											-6.79359	7.06608	2
											-6.67327	7.11198	2
											-6.55265	7.15765	2
											-6.43171	7.20309	2
											-6.31047	7.2483	2
											-6.18892	7.29327	2
											-6.06708	7.338	2
											-5.94495	7.38249	2
											-5.82253	7.42674	2
											-5.69983	7.47075	2
											-5.57685	7.51452	2
											-5.4536	7.55804	2
											-5.33009	7.60131	2
											-5.20631	7.64433	2
											-5.08227	7.6871	2
											-4.95798	7.72962	2
											-4.83344	7.77188	2
											-4.70866	7.81389	2
											-4.58364	7.85564	2
											-4.45839	7.89713	2
											-4.33291	7.93836	2
											-4.20721	7.97932	2
											-4.08129	8.02003	2
											-3.95516	8.06046	2
											-3.82882	8.10063	2
											-3.70227	8.14053	2
											-3.57553	8.18015	2
											-3.44859	8.21951	2
											-3.32147	8.25859	2
											-3.19417	8.2974	2
											-3.06668	8.33592	2
											-2.93903	8.37417	2
											-2.8112	8.41214	2
											-2.68321	8.44983	2
											-2.55507	8.48724	2
											-2.42677	8.52436	2
											-2.29833	8.56119	2
											-2.16974	8.59774	2
											-2.04101	8.634	2
											-1.91216	8.66997	2
											-1.78317	8.70564	2
											-1.65406	8.74103	2
											-1.52484	8.77612	2
											-1.3955	8.81091	2
											-1.26606	8.8454	2
											-1.13652	8.8796	2
											-1.00688	8.9135	2
											-0.87715	8.94709	2
											-0.74733	8.98038	2
											-0.61743	9.01337	2
											-0.48745	9.04606	2
											-0.35741	9.07843	2
											-0.2273	9.1105	2
											-0.09712	9.14226	2
											0.0331	9.17371	2
											0.16338	9.20485	2
											0.29371	9.23567	2
											0.42407	9.26618	2
											0.55447	9.29638	2
											0.68489	9.32625	2
											0.81535	9.35581	2
											0.94582	9.38506	2
											1.0763	9.41398	2
											1.2068	9.44258	2
											1.3373	9.47086	2
											1.46779	9.49881	2
											1.59828	9.52644	2
											1.72876	9.55375	2
											1.85922	9.58072	2
											1.98966	9.60737	2
											2.12008	9.63369	2
											2.25046	9.65968	2
											2.3808	9.68535	2
											2.5111	9.71067	2
											2.64135	9.73567	2
											2.77155	9.76033	2
											2.90169	9.78466	2
											3.03177	9.80865	2
											3.16178	9.8323	2
											3.29172	9.85562	2
											3.42158	9.8786	2
											3.55135	9.90123	2
											3.68104	9.92353	2
											3.81063	9.94549	2
											3.94012	9.9671	2
											4.06951	9.98837	2
											4.19878	10.0093	2
											4.32795	10.0299	2
											4.45699	10.0501	2
											4.58591	10.07	2
											4.7147	10.0895	2
											4.84336	10.1088	2
											4.97187	10.1276	2
											5.10024	10.1461	2
											5.22846	10.1642	2
											5.35652	10.182	2
											5.48443	10.1995	2
											5.61216	10.2166	2
											5.73973	10.2333	2
											5.86712	10.2497	2
											5.99434	10.2657	2
											6.12136	10.2814	2
											6.2482	10.2967	2
											6.37484	10.3117	2
											6.50128	10.3263	2
											6.62751	10.3406	2
											6.75353	10.3544	2
											6.87934	10.368	2
											7.00493	10.3811	2
											7.13029	10.394	2
											7.25542	10.4064	2
											7.38032	10.4185	2
											7.50497	10.4302	2
											7.62938	10.4416	2
											7.75354	10.4526	2
											7.87745	10.4633	2
											8.00109	10.4736	2
											8.12447	10.4835	2
											8.24758	10.4931	2
											8.37041	10.5023	2
											8.49297	10.5111	2
											8.61524	10.5196	2
											8.73722	10.5277	2
											8.85891	10.5354	2
											8.9803	10.5428	2
											9.10138	10.5498	2
											9.22216	10.5564	2
											9.34262	10.5627	2
											9.46277	10.5686	2
											9.58259	10.5741	2
											9.70209	10.5793	2
											9.82125	10.5841	2
											9.94008	10.5885	2
											10.0586	10.5926	2
											10.1767	10.5963	2
											10.2945	10.5997	2
											10.4119	10.6026	2
											10.529	10.6052	2
											10.6457	10.6075	2
											10.762	10.6093	2
											10.878	10.6108	2
											10.9936	10.6119	2
											11.1088	10.6127	2
											11.2236	10.6131	2
											11.338	10.6131	2
											11.452	10.6127	2
											11.5657	10.612	2
											11.6789	10.6109	2
											11.7917	10.6095	2
											11.9041	10.6077	2
											12.016	10.6055	2
											12.1276	10.6029	2
											12.2387	10.6	2
											12.3494	10.5967	2
											12.4596	10.593	2
											12.5694	10.589	2
											12.6788	10.5846	2
											12.7877	10.5798	2
											12.8962	10.5747	2
											13.0042	10.5692	2
											13.1117	10.5633	2
											13.2188	10.5571	2
											13.3254	10.5505	2
											13.4315	10.5435	2
											13.5372	10.5362	2
											13.6423	10.5285	2
											13.747	10.5204	2
											13.8512	10.512	2
											13.9549	10.5032	2
											14.058	10.494	2
											14.1607	10.4845	2
											14.2629	10.4746	2
											14.3645	10.4643	2
											14.4657	10.4537	2
											14.5663	10.4428	2
											14.6664	10.4314	2
											14.766	10.4197	2
											14.865	10.4077	2
											14.9635	10.3953	2
											15.0614	10.3825	2
											15.1588	10.3693	2
											15.2557	10.3558	2
											15.352	10.342	2
											15.4478	10.3278	2
											15.543	10.3132	2
											15.6376	10.2983	2
											15.7317	10.283	2
											15.8252	10.2673	2
											15.9181	10.2513	2
											16.0104	10.235	2
											16.1022	10.2183	2
											16.1934	10.2012	2
											16.284	10.1838	2
											16.374	10.1661	2
											16.4634	10.1479	2
											16.5522	10.1295	2
											16.6404	10.1107	2
											16.7279	10.0915	2
											16.8149	10.072	2
											16.9013	10.0521	2
											16.987	10.032	2
											17.0722	10.0114	2
											17.1567	9.99051	2
											17.2405	9.96927	2
											17.3238	9.94769	2
											17.4064	9.92577	2
											17.4884	9.90351	2
											17.5697	9.8809	2
											17.6504	9.85796	2
											17.7305	9.83468	2
											17.8099	9.81106	2
											17.8886	9.7871	2
											17.9667	9.76281	2
											18.0441	9.73818	2
											18.1209	9.71322	2
											18.197	9.68793	2
											18.2724	9.6623	2
											18.3472	9.63634	2
											18.4213	9.61006	2
											18.4947	9.58344	2
											18.5674	9.55649	2
											18.6394	9.52922	2
											18.7108	9.50163	2
											18.7815	9.4737	2
											18.8514	9.44546	2
											18.9207	9.41689	2
											18.9893	9.388	2
											19.0572	9.35879	2
											19.1244	9.32926	2
											19.1909	9.29942	2
											19.2567	9.26926	2
											19.3217	9.23878	2
											19.3861	9.20798	2
											19.4497	9.17688	2
											19.5126	9.14546	2
											19.5748	9.11373	2
											19.6363	9.0817	2
											19.6971	9.04935	2
											19.7571	9.0167	2
											19.8164	8.98374	2
											19.8749	8.95048	2
											19.9328	8.91692	2
											19.9899	8.88305	2
											20.0462	8.84888	2
											20.1018	8.81442	2
											20.1567	8.77966	2
											20.2108	8.7446	2
											20.2642	8.70924	2
											20.3168	8.6736	2
											20.3687	8.63766	2
											20.4198	8.60143	2
											20.4701	8.56491	2
											20.5197	8.5281	2
											20.5686	8.49101	2
											20.6166	8.45364	2
											20.664	8.41598	2
											20.7105	8.37803	2
											20.7563	8.33981	2
											20.8013	8.30131	2
											20.8455	8.26253	2
											20.889	8.22348	2
											20.9317	8.18415	2
											20.9736	8.14455	2
											21.0148	8.10468	2
											21.0551	8.06454	2
											21.0947	8.02413	2
											21.1335	7.98346	2
											21.1715	7.94252	2
											21.2087	7.90132	2
											21.2452	7.85986	2
											21.2808	7.81813	2
											21.3157	7.77615	2
											21.3497	7.73391	2
											21.383	7.69142	2
											21.4155	7.64868	2
											21.4472	7.60568	2
											21.478	7.56243	2
											21.5081	7.51894	2
											21.5374	7.4752	2
											21.5659	7.43121	2
											21.5936	7.38699	2
											21.6205	7.34252	2
											21.6466	7.29781	2
											21.6718	7.25286	2
											21.6963	7.20768	2
											21.72	7.16227	2
											21.7428	7.11662	2
											21.7649	7.07074	2
											21.7861	7.02464	2
											21.8065	6.9783	2
											21.8261	6.93175	2
											21.845	6.88497	2
											21.863	6.83796	2
											21.8801	6.79074	2
											21.8965	6.74331	2
											21.912	6.69565	2
											21.9268	6.64778	2
											21.9407	6.5997	2
											21.9538	6.55141	2
											21.9661	6.50292	2
											21.9776	6.45421	2
											21.9882	6.40531	2
											21.998	6.3562	2
											22.007	6.30689	2
											22.0153	6.25738	2
											22.0226	6.20768	2
											22.0292	6.15778	2
											22.0349	6.10769	2
											22.0398	6.0574	2
											22.0439	6.00693	2
											22.0472	5.95628	2
											22.0496	5.90544	2
											22.0513	5.85441	2
											22.0521	5.80321	2
											22.0521	5.75183	2
											22.0513	5.70027	2
											22.0496	5.64854	2
											22.0471	5.59663	2
											22.0439	5.54456	2
											22.0398	5.49231	2
											22.0348	5.4399	2
											22.0291	5.38733	2
											22.0225	5.3346	2
											22.0151	5.2817	2
											22.0069	5.22865	2
											21.9979	5.17544	2
											21.988	5.12208	2
											21.9774	5.06856	2
											21.9659	5.0149	2
											21.9536	4.96109	2
											21.9404	4.90714	2
											21.9265	4.85304	2
											21.9118	4.7988	2
											21.8962	4.74442	2
											21.8798	4.68991	2
											21.8626	4.63526	2
											21.8446	4.58048	2
											21.8258	4.52557	2
											21.8062	4.47053	2
											21.7857	4.41537	2
											21.7645	4.36008	2
											21.7424	4.30468	2
											21.7196	4.24915	2
											21.6959	4.1935	2
											21.6714	4.13775	2
											21.6461	4.08187	2
											21.62	4.02589	2
											21.5931	3.9698	2
											21.5654	3.91361	2
											21.5369	3.85731	2
											21.5076	3.80091	2
											21.4775	3.74441	2
											21.4466	3.68781	2
											21.4149	3.63112	2
											21.3824	3.57434	2
											21.3491	3.51746	2
											21.315	3.4605	2
											21.2802	3.40345	2
											21.2445	3.34632	2
											21.2081	3.28911	2
											21.1708	3.23182	2
											21.1328	3.17445	2
											21.094	3.11701	2
											21.0544	3.05949	2
											21.014	3.00191	2
											20.9729	2.94426	2
											20.9309	2.88654	2
											20.8882	2.82876	2
											20.8448	2.77092	2
											20.8005	2.71302	2
											20.7555	2.65507	2
											20.7097	2.59706	2
											20.6631	2.539	2
											20.6158	2.48089	2
											20.5677	2.42273	2
											20.5188	2.36453	2
											20.4692	2.30629	2
											20.4188	2.248	2
											20.3677	2.18968	2
											20.3158	2.13132	2
											20.2632	2.07293	2
											20.2098	2.01451	2
											20.1557	1.95606	2
											20.1008	1.89759	2
											20.0452	1.83909	2
											19.9888	1.78057	2
											19.9317	1.72203	2
											19.8739	1.66347	2
											19.8153	1.6049	2
											19.756	1.54632	2
											19.696	1.48772	2
											19.6352	1.42912	2
											19.5737	1.37051	2
											19.5115	1.3119	2
											19.4486	1.25329	2
											19.3849	1.19468	2
											19.3205	1.13608	2
											19.2555	1.07748	2
											19.1897	1.01889	2
											19.1232	0.96031	2
											19.056	0.90175	2
											18.9881	0.8432	2
											18.9195	0.78466	2
											18.8502	0.72615	2
											18.7802	0.66766	2
											18.7095	0.6092	2
											18.6381	0.55076	2
											18.5661	0.49235	2
											18.4933	0.43397	2
											18.4199	0.37563	2
											18.3458	0.31732	2
											18.271	0.25905	2
											18.1956	0.20083	2
											18.1195	0.14264	2
											18.0427	0.0845	2
											17.9653	0.02641	2
											17.8872	-0.03163	2
											17.8084	-0.08961	2
											17.729	-0.14755	2
											17.6489	-0.20542	2
											17.5682	-0.26324	2
											17.4869	-0.32099	2
											17.4049	-0.37869	2
											17.3223	-0.43631	2
											17.239	-0.49387	2
											17.1551	-0.55135	2
											17.0706	-0.60877	2
											16.9855	-0.6661	2
											16.8997	-0.72336	2
											16.8133	-0.78054	2
											16.7264	-0.83764	2
											16.6388	-0.89465	2
											16.5505	-0.95158	2
											16.4617	-1.00842	2
											16.3723	-1.06517	2
											16.2823	-1.12182	2
											16.1917	-1.17838	2
											16.1005	-1.23484	2
											16.0088	-1.2912	2
											15.9164	-1.34746	2
											15.8235	-1.40361	2
											15.73	-1.45966	2
											15.6359	-1.5156	2
											15.5412	-1.57142	2
											15.446	-1.62714	2
											15.3503	-1.68274	2
											15.2539	-1.73822	2
											15.1571	-1.79358	2
											15.0596	-1.84881	2
											14.9617	-1.90393	2
											14.8632	-1.95891	2
											14.7641	-2.01377	2
											14.6646	-2.0685	2
											14.5645	-2.1231	2
											14.4638	-2.17755	2
											14.3627	-2.23188	2
											14.261	-2.28606	2
											14.1588	-2.3401	2
											14.0562	-2.394	2
											13.953	-2.44775	2
											13.8493	-2.50135	2
											13.7451	-2.55481	2
											13.6404	-2.60811	2
											13.5352	-2.66125	2
											13.4296	-2.71424	2
											13.3234	-2.76707	2
											13.2168	-2.81975	2
											13.1098	-2.87225	2
											13.0022	-2.9246	2
											12.8942	-2.97677	2
											12.7857	-3.02878	2
											12.6768	-3.08062	2
											12.5674	-3.13228	2
											12.4576	-3.18377	2
											12.3474	-3.23508	2
											12.2367	-3.28621	2
											12.1256	-3.33716	2
											12.014	-3.38793	2
											11.902	-3.43851	2
											11.7896	-3.48891	2
											11.6768	-3.53911	2
											11.5636	-3.58913	2
											11.4499	-3.63895	2
											11.3359	-3.68858	2
											11.2215	-3.73801	2
											11.1067	-3.78724	2
											10.9915	-3.83626	2
											10.8759	-3.88509	2
											10.7599	-3.93371	2
											10.6436	-3.98213	2
											10.5268	-4.03033	2
											10.4098	-4.07833	2
											10.2923	-4.12611	2
											10.1745	-4.17368	2
											10.0564	-4.22103	2
											9.93791	-4.26817	2
											9.81908	-4.31508	2
											9.69991	-4.36177	2
											9.58041	-4.40824	2
											9.46058	-4.45448	2
											9.34043	-4.5005	2
											9.21996	-4.54628	2
											9.09917	-4.59184	2
											8.97808	-4.63716	2
											8.85669	-4.68225	2
											8.735	-4.7271	2
											8.61301	-4.77171	2
											8.49073	-4.81608	2
											8.36817	-4.86021	2
											8.24533	-4.9041	2
											8.12222	-4.94775	2
											7.99883	-4.99114	2
											7.87518	-5.03429	2
											7.75127	-5.07718	2
											7.62711	-5.11983	2
											7.5027	-5.16222	2
											7.37804	-5.20436	2
											7.25314	-5.24623	2
											7.128	-5.28785	2
											7.00263	-5.32921	2
											6.87704	-5.37031	2
											6.75123	-5.41114	2
											6.62521	-5.45171	2
											6.49897	-5.49201	2
											6.37252	-5.53205	2
											6.24588	-5.57181	2
											6.11904	-5.6113	2
											5.99201	-5.65052	2
											5.8648	-5.68946	2
											5.7374	-5.72813	2
											5.60983	-5.76652	2
											5.48209	-5.80463	2
											5.35418	-5.84246	2
											5.22612	-5.88001	2
											5.09789	-5.91727	2
											4.96952	-5.95425	2
											4.841	-5.99094	2
											4.71235	-6.02734	2
											4.58356	-6.06346	2
											4.45463	-6.09928	2
											4.32559	-6.13481	2
											4.19642	-6.17004	2
											4.06714	-6.20499	2
											3.93775	-6.23963	2
											3.80826	-6.27398	2
											3.67867	-6.30802	2
											3.54898	-6.34177	2
											3.4192	-6.37521	2
											3.28934	-6.40835	2
											3.15941	-6.44119	2
											3.02939	-6.47372	2
											2.89931	-6.50594	2
											2.76917	-6.53786	2
											2.63897	-6.56946	2
											2.50872	-6.60075	2
											2.37842	-6.63173	2
											2.24807	-6.6624	2
											2.11769	-6.69275	2
											1.98728	-6.72279	2
											1.85684	-6.75251	2
											1.72638	-6.78191	2
											1.5959	-6.81099	2
											1.46541	-6.83975	2
											1.33491	-6.86819	2
											1.20441	-6.89631	2
											1.07392	-6.9241	2
											0.94343	-6.95157	2
											0.81296	-6.97871	2
											0.68251	-7.00552	2
											0.55208	-7.03201	2
											0.42169	-7.05817	2
											0.29132	-7.08399	2
											0.161	-7.10949	2
											0.03072	-7.13465	2
											-0.0995	-7.15948	2
											-0.22967	-7.18397	2
											-0.35979	-7.20813	2
											-0.48983	-7.23195	2
											-0.6198	-7.25544	2
											-0.7497	-7.27859	2
											-0.87952	-7.30139	2
											-1.00925	-7.32386	2
											-1.13889	-7.34599	2
											-1.26843	-7.36777	2
											-1.39787	-7.38922	2
											-1.5272	-7.41031	2
											-1.65643	-7.43107	2
											-1.78553	-7.45148	2
											-1.91451	-7.47154	2
											-2.04337	-7.49126	2
											-2.17209	-7.51063	2
											-2.30067	-7.52965	2
											-2.42912	-7.54832	2
											-2.55741	-7.56664	2
											-2.68555	-7.58461	2
											-2.81354	-7.60223	2
											-2.94136	-7.6195	2
											-3.06901	-7.63642	2
											-3.19649	-7.65298	2
											-3.3238	-7.66919	2
											-3.45092	-7.68504	2
											-3.57785	-7.70054	2
											-3.70459	-7.71569	2
											-3.83113	-7.73047	2
											-3.95746	-7.7449	2
											-4.08359	-7.75897	2
											-4.20951	-7.77269	2
											-4.33521	-7.78604	2
											-4.46068	-7.79904	2
											-4.58593	-7.81168	2
											-4.71094	-7.82395	2
											-4.83572	-7.83587	2
											-4.96025	-7.84742	2
											-5.08454	-7.85862	2
											-5.20857	-7.86945	2
											-5.33235	-7.87991	2
											-5.45586	-7.89002	2
											-5.5791	-7.89976	2
											-5.70208	-7.90914	2
											-5.82477	-7.91815	2
											-5.94719	-7.9268	2
											-6.06931	-7.93509	2
											-6.19115	-7.94301	2
											-6.31269	-7.95056	2
											-6.43392	-7.95775	2
											-6.55486	-7.96457	2
											-6.67548	-7.97103	2
											-6.79578	-7.97712	2
											-6.91577	-7.98284	2
											-7.03543	-7.9882	2
											-7.15476	-7.99319	2
											-7.27375	-7.99781	2
											-7.39241	-8.00207	2
											-7.51072	-8.00595	2
											-7.62868	-8.00947	2
											-7.74629	-8.01262	2
											-7.86354	-8.0154	2
											-7.98043	-8.01782	2
											-8.09695	-8.01986	2
											-8.21311	-8.02154	2
											-8.32888	-8.02285	2
											-8.44427	-8.02379	2
											-8.55928	-8.02436	2
											-8.6739	-8.02456	2
											-8.78812	-8.0244	2
											-8.90194	-8.02386	2
											-9.01536	-8.02296	2
											-9.12837	-8.02169	2
											-9.24097	-8.02005	2
											-9.35315	-8.01804	2
											-9.46491	-8.01567	2
											-9.57624	-8.01292	2
											-9.68715	-8.00981	2
											-9.79762	-8.00633	2
											-9.90765	-8.00248	2
											-10.0172	-7.99826	2
											-10.1264	-7.99367	2
											-10.2351	-7.98872	2
											-10.3433	-7.9834	2
											-10.4511	-7.97772	2
											-10.5584	-7.97166	2
											-10.6652	-7.96525	2
											-10.7716	-7.95846	2
											-10.8774	-7.95131	2
											-10.9828	-7.94379	2
											-11.0878	-7.93591	2
											-11.1922	-7.92766	2
											-11.2961	-7.91905	2
											-11.3995	-7.91007	2
											-11.5025	-7.90073	2
											-11.6049	-7.89102	2
											-11.7068	-7.88095	2
											-11.8082	-7.87052	2
											-11.9091	-7.85973	2
											-12.0094	-7.84857	2
											-12.1093	-7.83706	2
											-12.2086	-7.82518	2
											-12.3073	-7.81294	2
											-12.4056	-7.80034	2
											-12.5033	-7.78738	2
											-12.6004	-7.77406	2
											-12.697	-7.76038	2
											-12.793	-7.74635	2
											-12.8885	-7.73195	2
											-12.9834	-7.7172	2
											-13.0778	-7.70209	2
											-13.1715	-7.68663	2
											-13.2648	-7.67081	2
											-13.3574	-7.65464	2
											-13.4494	-7.63811	2
											-13.5409	-7.62123	2
											-13.6318	-7.604	2
											-13.7221	-7.58642	2
											-13.8118	-7.56848	2
											-13.9009	-7.55019	2
											-13.9894	-7.53156	2
											-14.0773	-7.51257	2
											-14.1646	-7.49324	2
											-14.2512	-7.47356	2
											-14.3373	-7.45353	2
											-14.4227	-7.43315	2
											-14.5075	-7.41243	2
											-14.5917	-7.39137	2
											-14.6753	-7.36996	2
											-14.7582	-7.34821	2
											-14.8405	-7.32612	2
											-14.9222	-7.30369	2
											-15.0032	-7.28091	2
											-15.0836	-7.2578	2
											-15.1633	-7.23435	2
											-15.2424	-7.21056	2
											-15.3208	-7.18644	2
											-15.3985	-7.16197	2
											-15.4756	-7.13718	2
											-15.552	-7.11205	2
											-15.6278	-7.08659	2
											-15.7029	-7.0608	2
											-15.7773	-7.03468	2
											-15.8511	-7.00822	2
											-15.9242	-6.98144	2
											-15.9965	-6.95433	2
											-16.0682	-6.9269	2
											-16.1393	-6.89914	2
											-16.2096	-6.87106	2
											-16.2792	-6.84265	2
											-16.3482	-6.81392	2
											-16.4164	-6.78487	2
											-16.4839	-6.7555	2
											-16.5508	-6.72582	2
											-16.6169	-6.69581	2
											-16.6823	-6.66549	2
											-16.747	-6.63486	2
											-16.811	-6.60391	2
											-16.8743	-6.57265	2
											-16.9369	-6.54107	2
											-16.9987	-6.50919	2
											-17.0598	-6.477	2
											-17.1202	-6.4445	2
											-17.1799	-6.41169	2
											-17.2388	-6.37858	2
											-17.297	-6.34517	2
											-17.3544	-6.31146	2
											-17.4112	-6.27744	2
											-17.4672	-6.24312	2
											-17.5224	-6.20851	2
											-17.5769	-6.1736	2
											-17.6306	-6.13839	2
											-17.6836	-6.10289	2
											-17.7359	-6.0671	2
											-17.7873	-6.03102	2
											-17.8381	-5.99464	2
											-17.8881	-5.95798	2
											-17.9373	-5.92103	2
											-17.9857	-5.8838	2
											-18.0334	-5.84628	2
											-18.0804	-5.80848	2
											-18.1266	-5.77039	2
											-18.1719	-5.73203	2
											-18.2166	-5.69339	2
											-18.2604	-5.65448	2
											-18.3035	-5.61529	2
											-18.3458	-5.57582	2
											-18.3873	-5.53609	2
											-18.4281	-5.49608	2
											-18.4681	-5.45581	2
											-18.5072	-5.41527	2
											-18.5456	-5.37446	2
											-18.5832	-5.33339	2
											-18.6201	-5.29206	2
											-18.6561	-5.25046	2
											-18.6914	-5.20861	2
											-18.7258	-5.1665	2
											-18.7595	-5.12414	2
											-18.7924	-5.08152	2
											-18.8245	-5.03865	2
											-18.8558	-4.99552	2
											-18.8862	-4.95215	2
											-18.9159	-4.90854	2
											-18.9448	-4.86467	2
											-18.9729	-4.82057	2
											-19.0002	-4.77622	2
											-19.0267	-4.73163	2
											-19.0524	-4.6868	2
											-19.0772	-4.64174	2
											-19.1013	-4.59644	2
											-19.1245	-4.55091	2
											-19.147	-4.50515	2
											-19.1686	-4.45915	2
											-19.1895	-4.41294	2
											-19.2095	-4.36649	2
											-19.2287	-4.31982	2
											-19.2471	-4.27293	2
											-19.2647	-4.22582	2
											-19.2815	-4.17849	2
											-19.2974	-4.13094	2
											-19.3126	-4.08318	2
[truncated: 3 more rows]

## Sheet: Sheet4
Metabolite	PC1	PC2	Spectra Names	PC1	PC2
Loadings	Loadings	Loadings	Scores	Scores	Scores
sucrose	-0.10784	-0.13241	9589-S	1.47721	1.69704
tremuloidin	-0.11073	0.00886	1181-S	1.43616	1.44036
salicin	-0.12008	-0.00869	9860-N	3.5876	2.97171
myo-inositol	-0.10161	-0.07034	1031-N	8.29915	1.87414
quinic acid	0.05918	-0.1493	9953-N	-5.48021	-4.86658
glucose	0.02741	-0.17793	1121-S	5.2081	1.6789
trichocarpin	-0.12358	0.03927	856-S	-2.41053	3.55484
7.10 169 101 68	-0.1027	-0.01233	LILC-26-4-S	-5.15252	-2.63675
16.09 105 179 268 361 483 573	-0.12834	0.02508	1024-N	1.6372	-11.9327
malic acid	-0.04863	-0.14861	425-N	-15.8646	4.18776
shikimic acid	-0.01503	-0.20373	9591-S	7.26245	2.0313
citric acid	-0.05756	-0.10101
2-phenethyl-glucoside	-0.10819	-0.08358
11.80 389 491	0.000196279	-0.17688
catechol	-0.13544	-0.00982
fructose	0.02963	-0.18137
1,2-cyclohexanediol glucoside	-0.13319	0.00168
10.79 397 425 471	-0.09046	-0.12447
5-oxo-proline	-0.08723	-0.12884
10.82 393 257 303	0.01231	-0.18455
catechin	0.00249	-0.11729
a-linolenic acid	-0.06333	-0.04994
digalactosylglycerol	-0.04255	-0.05944
tremulacin	-0.11394	0.08556
threonic acid	-0.02308	-0.1944
galactose	0.02055	-0.18128
10.88 397 425 471	-0.09535	-0.11424
salicortin	-0.08642	0.07644
monogalactosylglycerol	-0.05116	-0.04361
phosphate	0.00588	-0.19346
glyceric acid	-0.01457	-0.1938
palmitic acid	-0.11611	-0.0811
quercetin	-0.09676	0.01938
B-sitosterol	-0.13013	-0.04928
raffinose	-0.03124	-0.18127
10.64 397 425 471	-0.0937	-0.12196
12.84 235 204 glycoside	-0.10968	-0.07032
phenol	-0.1351	0.04807
salicyltremuloidin	-0.11561	0.08638
rutin	0.04114	0.0168
salicylic acid	-0.13764	0.05318
ribitol	0.04829	-0.16224
glycerol	-0.03858	-0.13944
2,5-dihydroxybenzoic acid-5-O-glucoside	-0.09688	0.02716
succinic acid	-0.05288	-0.17905
quercetin-3-O-(6'-malonyl)-B-D-glucoside	-0.00404	0.06073
benzoyl-salicyloylsalicin	-0.11784	0.0771
salicyl-salicylic acid-2-O-glucoside	-0.06132	-0.03385
salicyl-coumaroyl-glucoside	-0.12353	0.04154
2,5-dihydroxybenzoic acid-2-O-glucoside	-0.09357	-0.05888
iso-salicin	-0.12814	-0.00697
a-salicyloylsalicin	-0.09628	0.07289
arabitol	0.02152	-0.102
erythronic acid	-0.01953	-0.15618
phenethyltremuloidin	-0.05659	-0.0562
15.81 297 guaiacyl lignan	-0.1099	0.09215
stearic acid	-0.13484	-0.04821
13.81 169 331 263 233 glycoside	-0.12629	-0.01224
D-threono-1,4-lactone	-0.10233	-0.12861
2,3-dihydroxybenzoic acid-3-O-glucoside	-0.09745	-0.0357
vanillyl alcohol 4-O-glucoside	-0.09235	-0.07241
2-methoxyhydroquinone-1-O-glucoside	-0.0782	-0.12252
salirepin	-0.07361	-0.08196
1,2,4-benzenetriol	-0.13858	0.03633
catechol glucoside	-0.12141	0.00657
xylitol	0.00734	-0.01883
salicyl alchohol	-0.12304	0.02343
gentisyl alcohol 5-O-glucoside	-0.07497	-0.08307
12.36 539 359 sugar	0.05209	-0.06995
4-O-caffeoyl-quinic acid	-0.00365	-0.00241
caffeic acid	-0.13511	-0.01369
5-O-caffeoyl-quinic acid	-0.03092	0.02961
1,2,3-benzenetriol	-0.13229	0.0312
maleic acid	-0.1308	0.01987
fumaric acid	-0.11076	-0.07058
15.95 297 guaiacyl lignan	-0.11314	0.08254
14.17 321 105 223 glycoside	-0.10981	0.0294
trichocarpinene	-0.12672	0.05519
14.90 287 glycoside	-0.12484	0.02004
14.08 261 glycoside	-0.00797	-0.06185
kaempferol	-0.07982	-0.02585
15.60 297 guaiacyl lignan	-0.12578	0.05299
arbutin	-0.11447	-0.02381
vanillyl alcohol 4-O-glucoside	-0.11133	-0.05049
19.89 171 307 469 204	-0.13585	0.0376
2-methoxyhydroquinone-4-O-glucoside	-0.10475	-0.11486
22.94 373 trichocarpin conjugate	-0.13089	0.03942
17.90 219 375 597	-0.0274	-0.12269
3-O-caffeoyl-quinic acid	-0.06249	0.00713
mannitol	0.07139	-0.09157
15.91 297 guaiacyl lignan	-0.13455	0.05093
epi-catechin	-0.01124	0.06106
gallocatechin	0.04946	-0.13406
lactic acid	-0.12062	-0.06887
13.96 261 glycoside	-0.05846	-0.12287
13.89 261 glycoside	-0.10812	-0.02176
17.26 219 171 331	-0.11838	0.01811
5-hydroxyferulic acid glucoside	-0.09611	0.07747
14.21 321 glycoside	-0.00522	-0.1652
1-hexacosanol	-0.11246	0.08398
19.95 557 647 575 590	0.00714	0.00718
13.78 157 glycoside	-0.08105	-0.08822
17.21 219 171 331	-0.11664	0.05967
16.39 547 457 flavonoid	-0.10281	-0.00215
18.05 219 171 331	-0.11414	0.06683
14.86 287 glycoside	-0.12014	0.06883
18.94 219 91	-0.11541	0.06533
18.25 219 171 331	-0.11163	0.05851
GABA	-0.05566	-0.11917
17.93 219 375 597	-0.0922	0.08752
18.97 249 171	-0.11862	0.02642
16.46 547 457 flavonoid	-0.10935	0.06993
18.91 307 171	-0.11389	0.06477
dihydromyricetin	0.04985	-0.12859
isorhamnetin	-0.01132	0.05813
