# Supplementary material for: Variable lignin structure revealed inPopulusleaves
Source: Royal Society of Chemistry journal article supplement (doi:10.1039/d3ra03142j), 2023-01-01
Supplement: d3ra03142j3.xlsx [file d3ra03142j3.xlsx]

## Sheet: Raw2 (4)
Metabolite abundance (μg/g DW in sorbitol equivalents)	9589-S	1181-S	1121-S	856-S	LILC-26-4-S	9591-S	9860-N	1031-N	9953-N	1025-N	425-N
sucrose	271979	260895	189837	224151	378962	145955	222162	146732	457405	426783	407349
tremuloidin	95449	57741.4	70906.6	39061.6	139440	21878.5	81725.3	0	209857	0	176411
salicin	63689	51194.6	37348.2	44351	101144	24817.9	45473.7	103.415	97508.2	25612.8	94060.9
myo-inositol	30931.8	37636	19368.6	33720	33032.7	20248.5	23191.4	18208.8	28731.9	40562.7	41202.7
quinic acid	62692.9	57464.9	59883.4	29405.3	24148.3	31091.7	29130.7	55523.1	28391.8	143311	8003.95
glucose	20226.6	18282.5	41119.1	8564.4	22379.9	28487.7	8871.78	13443.8	21189.6	129027	7701.79
trichocarpin	19399.7	14313.3	2921.14	6279.88	15093.8	3821.59	8844.59	63.6786	20102.3	2126.8	32742
7.10 169 101 68	6079.25	3108.77	3285.27	2428.08	14855.2	954.439	3121.2	19.7612	9026.87	651.583	9053.75
16.09 105 179 268 361 483 573	3596.92	2033	2665.03	2451.91	5740.67	843.423	3350.99	5.22329	9550.49	68.4575	12063
malic acid	4370.54	1541.71	2975.92	767.158	7675.65	2409.15	5919.33	3061.99	18462.7	11001.9	5310.75
shikimic acid	7533.76	5523.51	4641.4	5626.7	16158.2	8727.37	5403.6	6718.25	24291	31190.7	4325.74
citric acid	5848.55	391.062	2754.76	626.086	4778.5	1348.75	3718.22	1248.31	5051.22	4972.51	4186.23
2-phenethyl-glucoside	6153.5	4131.45	2607.94	7652.97	13684.8	1798.45	3666.1	4113.85	12858	7280.03	9432.28
11.80 389 491	2400.78	4236.81	2820.97	5899.39	3130.31	2557.11	3167.66	3588.94	5902.6	13583.6	2727.98
catechol	1996.69	1565.29	1931.99	2057.47	4326.28	472.044	1815.62	17.6707	5673.97	1498.97	7034.81
fructose	4749.1	3976.05	5528.3	2639.6	6884.15	7719.68	2477.16	4766.35	4356.77	25157.6	1814.09
1,2-cyclohexanediol glucoside	1267.83	1768.22	2993.15	5472.83	6951.09	633.916	1762.86	221.552	6040.43	1965.35	8631.02
10.79 397 425 471	2127.68	2121.14	1984.94	2042.73	2379.17	1095.74	1727.48	1613.97	2721.88	4479.63	3996.77
5-oxo-proline	1426.76	1797.3	675.477	894.723	2995.56	975.331	1111.17	981.968	3300.92	2276.12	2069.7
10.82 393 257 303	2557.89	3190.35	1595.01	2848.08	3535.81	3061.15	1177.64	3401.67	3250.49	10540.9	1945.26
catechin	1369.5	2322.58	1028.33	3134.96	432.906	1618.71	907.318	1013.21	882.747	5670.02	1702.4
a-linolenic acid	1292.73	1692.8	1135.77	1657.37	8016.23	2119.61	457.175	472.117	3070.87	1339.21	2222.18
digalactosylglycerol	1508.65	3008.5	1855.34	2495.83	7402.58	3743.37	1413.11	523.532	2828.44	2655.95	2164.44
tremulacin	3377.1	3473.86	870.046	12666.8	1412.2	309.679	799.75	0	880.197	0	30894.6
threonic acid	1060.32	717.343	631.571	550.048	1885.43	874.275	1158.61	1360.25	3383.41	3809.24	1049.54
galactose	689.841	952.254	2253.22	560.169	1238.61	2430.33	549.989	1596.76	2277.06	16067.8	526.038
10.88 397 425 471	1226.14	1235.25	1091.79	1161.13	1310.46	598.077	1008.37	865.243	1464.43	2361.05	2217.17
salicortin	3441.19	4187.71	215.415	50949.2	12590.7	1496.69	6307.3	164.214	5512.52	621.973	31845.5
monogalactosylglycerol	1124.13	2005.04	1788.13	1545.01	8974.27	2785.75	725.33	187.853	3481.07	1044.95	1887.72
phosphate	1491.8	1011.06	881.214	546.357	1433.58	1556.54	311.167	1050.24	2911.51	3433.64	475.426
glyceric acid	797.139	763.349	810.115	582.93	1391.3	507.805	494.223	920.384	3091.8	3008.55	369.004
palmitic acid	591.587	717.839	510.819	884.814	1900.2	685.893	445.387	331.965	1200.77	1241.38	1640.85
quercetin	268.33	330.629	142.03	405.302	242.451	200.526	109.244	57.9327	513.767	100.811	364.117
B-sitosterol	574.663	757.813	368.147	973.895	803.161	419.394	422.834	447.508	1076.91	1012.83	1510.29
raffinose	756.51	138.647	315.815	406.629	1084.05	404.303	518.418	143.616	773.289	1822.99	533.412
10.64 397 425 471	664.155	670.779	617.308	622.26	748.184	345.071	542.218	490.915	859.669	1362.14	1251.86
12.84 235 204 glycoside	582.549	954.026	708.589	1109.76	1167.95	222.055	905.313	412.992	902.282	1347.58	1444.97
phenol	480.727	224.108	186.226	417.513	733.915	57.6962	239.832	9.6582	476.37	60.3779	1211.85
salicyltremuloidin	1471.03	1596.81	407.327	3149.65	615.527	143.32	416.311	0	477.698	0	9122.5
rutin	720.332	624.851	431.907	855.624	332.282	599.237	147.561	183.018	227.863	441.384	79.8593
salicylic acid	450.563	357.384	162.253	794.326	731.918	218.805	405.729	96.0814	816.521	152.955	1739.13
ribitol	747.674	453.245	915.848	656.877	819.436	645.399	529.733	553.972	712.759	1208.9	260.901
glycerol	441.298	553.117	223.65	553.422	1962.5	896.857	307.108	295.796	971.768	1361.44	506.37
2,5-dihydroxybenzoic acid-5-O-glucoside	372.984	983.998	346.589	509.273	433.384	220.886	438.311	129.449	742.682	300.715	850.724
succinic acid	322.999	247.12	204.95	174.109	466.429	285.755	232.781	269.023	753.779	710.016	397.382
quercetin-3-O-(6'-malonyl)-B-D-glucoside	259.745	148.843	109.964	212.714	118.676	112.053	40.0874	45.0512	135.588	19.9462	51.2278
benzoyl-salicyloylsalicin	463.429	461.915	156.196	1399.86	282.792	82.7869	143.152	0	286.084	127.1	3881.39
salicyl-salicylic acid-2-O-glucoside	729.333	756.286	65.7532	685.435	3550.29	433.581	717.133	41.343	1575.4	97.8579	609.641
salicyl-coumaroyl-glucoside	314.094	314.405	215.235	785.924	927.655	79.7026	229.705	4.56973	453.356	83.2511	914.515
2,5-dihydroxybenzoic acid-2-O-glucoside	194.267	118.553	57.2549	181.196	454.804	67.9808	296.057	0	863.701	149.928	389.404
iso-salicin	298.605	252.517	151.666	199.76	631.04	93.532	112.726	21.6825	393.911	149.616	629.821
a-salicyloylsalicin	377.649	645.539	40.4571	4662.2	1850.71	153.691	876.983	51.7838	729.055	122.009	3299.25
arabitol	550.28	541.749	1048.42	744.964	313.76	363.79	338.721	432.865	351.264	1321.86	501.475
erythronic acid	163.997	63.1099	155.764	67.5939	224.814	102.093	209.516	114.145	495.125	326.86	82.9686
phenethyltremuloidin	48.615	155.485	17.2081	77.0956	126.496	221.152	38.2962	14.1001	524.46	73.3388	166.359
15.81 297 guaiacyl lignan	231.632	154.778	252.907	679.469	223.892	38.2164	224.191	85.9677	157.89	97.1079	919.781
stearic acid	173.284	167.114	101.16	243.613	373.914	123.796	124.608	85.0258	304.128	327.565	572.372
13.81 169 331 263 233 glycoside	77.8473	134.823	89.4892	207.635	363.623	35.4585	115.746	18.1547	501.431	50.4927	443.688
D-threono-1,4-lactone	231.437	271.751	135.069	194.454	387.884	141.353	119.856	23.7445	330.787	431.099	375.397
2,3-dihydroxybenzoic acid-3-O-glucoside	125.339	240.77	131.241	169.965	284.521	120.978	159.403	37.242	334.19	118.463	219.988
vanillyl alcohol 4-O-glucoside	56.6239	124.527	65.7238	143.6	102.026	27.9723	59.2244	60.6313	307.979	121.173	165.333
2-methoxyhydroquinone-1-O-glucoside	104.516	116.72	88.5999	149.485	93.902	67.5977	65.0671	71.4403	223.07	181.252	141.492
salirepin	129.883	75.0984	125.856	235.018	1035.29	113.374	193.079	0	662.274	249.609	260.699
1,2,4-benzenetriol	164.463	116.124	120.126	206.667	212.34	32.2206	103.67	9.5326	240.884	96.6959	556.485
catechol glucoside	75.402	90.3058	93.7131	330.512	426.656	45.4965	65.5852	15.5008	252.992	72.3035	366.047
xylitol	457.356	306.567	381.604	544.202	396.427	300.177	152.853	247.686	373.628	305.126	161.775
salicyl alchohol	213.612	96.3865	90.5963	141.324	484.131	155.273	100.929	5.57216	269.065	42.4185	531.812
gentisyl alcohol 5-O-glucoside	103.518	62.6374	101.248	190.786	807.005	88.7566	150.046	6.28423	513.202	206.577	215.045
12.36 539 359 sugar	438.03	256.384	236.914	216.757	257.628	322.705	145.254	153.004	214.05	323.092	92.2691
4-O-caffeoyl-quinic acid	226.13	359.4	136.602	353.835	89.3068	179.79	139.145	87.3426	143.417	262.608	163.291
caffeic acid	108.045	128.161	43.1856	142.826	119.773	76.589	73.0163	31.1496	168.97	121.599	244.269
5-O-caffeoyl-quinic acid	146.688	351.569	128.757	432.589	109.832	242.076	148.142	91.4744	201.174	218.056	230.034
1,2,3-benzenetriol	84.516	48.8804	62.6888	135.477	77.9235	20.3107	65.7306	6.08992	110.397	81.6853	287.011
maleic acid	167.891	103.434	115.104	189.251	222.847	29.4509	249.723	89.6305	278.994	160.205	520.554
fumaric acid	99.2377	61.3754	93.26	174.882	175.664	67.7545	131.831	164.72	294.86	312.487	440.192
15.95 297 guaiacyl lignan	83.7196	157.417	52.7625	412.727	83.2438	20.228	165.968	78.5051	89.6134	75.7055	888.284
14.17 321 105 223 glycoside	125.436	120.682	101.374	206.603	129.93	24.7667	103.301	64.5985	123.495	106.413	185.481
trichocarpinene	176.537	115.911	38.6309	86.2438	123.298	37.4407	108.551	2.94626	154.027	35.8955	349.343
14.90 287 glycoside	22.3257	22.7114	13.9451	92.8767	99.3815	7.88051	78.2967	2.36598	139.526	8.44192	147.109
14.08 261 glycoside	259.173	297.023	131.963	176.928	225.8	104.904	82.8065	165.637	112.129	249.301	151.641
kaempferol	29.459	143.194	59.5875	55.5448	62.6525	29.1967	36.7542	26.7457	103.309	63.714	104.011
15.60 297 guaiacyl lignan	39.2392	59.6895	37.5008	134.604	55.4794	9.31868	42.3868	19.0491	65.2579	54.1084	257.388
arbutin	63.9859	92.645	64.2983	82.2013	72.892	64.84	47.2756	53.6207	80.4736	106.676	160.383
vanillyl alcohol 4-O-glucoside	59.8029	102.917	42.8587	171.537	77.9205	29.3184	31.6325	29.0841	135.444	138.339	172.985
19.89 171 307 469 204	25.9025	4.43835	2.1874	59.3611	65.3201	7.75044	22.8613	0	61.5531	2.87025	112.307
2-methoxyhydroquinone-4-O-glucoside	59.5439	62.5749	58.2124	93.4351	77.1229	30.769	58.4829	43.1757	154.063	135.212	132.597
22.94 373 trichocarpin conjugate	78.0484	93.0687	28.097	92.9923	117.252	19.8771	53.3085	0	121.514	12.1292	158.943
17.90 219 375 597	9.15043	24.6415	24.5877	54.874	97.1252	40.5555	53.1	23.0704	0	152.022	66.1185
3-O-caffeoyl-quinic acid	241.021	120.572	114.382	91.8398	79.1785	101.01	70.9123	44.9102	78.6883	155.192	225.497
mannitol	14.7166	35.78	41.0042	32.5797	39.3086	53.3563	31.2417	45.437	41.3761	47.6645	21.6938
15.91 297 guaiacyl lignan	32.3324	20.1203	23.7553	66.1839	52.3779	6.79391	23.2122	12.0366	43.6207	20.8458	125.743
epi-catechin	13.3794	102.765	62.9765	289.464	22.7846	75.0374	9.87679	47.0314	26.5893	47.2828	63.4878
gallocatechin	201.792	331.957	317.292	124.437	0	1.60783	18.7693	734.687	0	1352.99	32.4815
lactic acid	42.1331	41.904	34.2477	44.1482	46.3578	27.974	28.3013	29.909	91.8652	80.8018	121.457
13.96 261 glycoside	90.3132	119.236	59.3184	99.7802	132.827	24.9977	49.357	63.8075	80.3452	147.419	89.3574
13.89 261 glycoside	39.9052	63.6304	58.6382	94.1041	49.7386	16.7304	46.885	26.9582	63.8512	79.5601	105.466
17.26 219 171 331	149.951	145.119	55.9774	57.9549	199.856	15.5544	54.9138	2.87923	44.8669	110.433	365.446
5-hydroxyferulic acid glucoside	57.5051	12.4159	23.5691	198.061	50.2668	49.5172	25.0959	16.9208	48.3309	26.4289	178.811
14.21 321 glycoside	54.3113	68.3747	60.5357	100.335	55.5965	17.1538	45.9582	36.7452	50.9077	446.699	82.7617
1-hexacosanol	31.9274	28.2541	26.2772	103.95	40.8667	11.4007	16.3569	14.8193	16.3142	17.0607	147.27
19.95 557 647 575 590	44.0781	70.3796	64.7198	171.473	3.13776	14.0742	8.47386	11.0245	18.6104	69.1279	8.65437
13.78 157 glycoside	23.2699	38.1691	16.665	37.0647	64.173	11.456	17.3423	46.0167	30.069	63.0597	62.1869
17.21 219 171 331	182.037	165.87	74.4289	79.9868	233.297	29.319	76.5575	0.991327	25.6271	57.6283	533.322
16.39 547 457 flavonoid	14.7614	4.61934	10.0688	22.2074	5.3908	0.45794	5.27956	2.35593	41.8761	5.20251	29.8603
18.05 219 171 331	193.163	143.649	82.3452	61.1314	173.263	18.3982	69.4845	13.7544	36.3041	41.633	514.567
14.86 287 glycoside	6.84656	8.91523	2.18919	38.0734	22.8919	3.73262	21.7174	4.06294	17.7381	4.85768	47.6541
18.94 219 91	46.6795	33.8265	20.3928	14.3476	52.9919	11.4871	27.1511	12.0223	21.1176	9.3362	259.628
18.25 219 171 331	159.445	119.586	57.6251	37.2169	135.6	17.1714	52.1325	7.40876	14.5064	53.642	439.565
GABA	15.2485	35.816	15.22	27.1473	63.7928	40.6911	22.8223	12.0894	124.202	50.5551	31.6397
17.93 219 375 597	99.4516	39.9942	16.6883	15.3895	14.5829	9.99272	13.9337	4.31346	0	0	168.915
18.97 249 171	18.8729	5.04438	12.3636	11.7864	64.8068	9.04161	26.073	2.26117	15.6998	13.756	89.1888
16.46 547 457 flavonoid	13.2523	11.8181	25.2705	38.2305	8.07135	2.10544	9.72153	4.50225	22.0828	8.68946	53.2161
18.91 307 171	76.6984	33.3116	15.9294	13.0728	88.7997	7.01679	49.5296	0	5.84651	9.07721	510.819
dihydromyricetin	29.9667	121.607	615.516	18.9345	0	0.667804	1.74441	329.585	0	940.103	3.29612
isorhamnetin	0	0.980566	0	2.11437	0	0	0	0	0	0	0
